# Supplementary material for: Deciphering the HLA-E immunopeptidome with mass spectrometry: an opportunity for universal mRNA vaccines and T-cell-directed immunotherapies
Source: Front Immunol. 2024 Sep 5;15:1442783. doi: 10.3389/fimmu.2024.1442783 (PMC11410602; doi:10.3389/fimmu.2024.1442783)
Supplement: Supplementary file 1 [file Table1.xlsx]

## Sheet: Joosten et al. non-MS
																						Sequence
#	Peptide sequence	Derived from	Accession number	HLA-E motif score	Discrimination score	Diversity ranking	Binding (in uM)															SMADRAENL
1	SMADRAENL	Rv1286	Q10600	268			>50															SMAGRAGQL
2	SMAGRAGQL	Rv3282	P96887	268			>50															IMANRAQVL
3	IMANRAQVL	Rv3532	Q6MWW4	268			0,4															KMNAKAATL
4	KMNAKAATL	Rv2911	Q7D6F2	263			15															QMKFYAVAL
5	QMKFYAVAL	Rv2119	33254	260			1,5															PMKRTALAL
6	PMKRTALAL	Rv0959	P0A5D7	259			18															GMNVTAPAL
7	GMNVTAPAL	Rv1617	6134	257			8															VMADRTRHL
8	VMADRTRHL	Rv0418	P96264	255			5															WMCDRAVDL
9	WMCDRAVDL	Rv2954c	Q50461	254			>50															LMVVRALFL
10	LMVVRALFL	Rv3101c	P96293	254			nt															EMVLRADQL
11	EMVLRADQL	Rv0191	7435	253			>50															DMLGRAGGL
12	DMLGRAGGL	Rv3015c	53262	253			>50															MMKYLAFGL
13	MMKYLAFGL	Rv0206c	53657	246			0,4															RMAATAQVL
14	RMAATAQVL	Rv2932	Q10978	237			2															FLAADALVL
15	FLAADALVL	Rv1047	P96354	185			>50															VEAFRTRPL
16	VEAFRTRPL	Rv1047	P96354	189			>50															LMGAEADAL
17	LMGAEADAL	Rv1047	P96354	210			>50															GLDSRAYRL
18	GLDSRAYRL	Rv0146	86321	212			>50															GLDARAYRL
19	GLDARAYRL	Rv0145	P96356	212			>50															PMAPLAPLL
20	PMAPLAPLL	Rv3871	69736	226			3															EMKTDAATL
21	EMKTDAATL	Rv3874	P0A566	246			>50															PMQQLTQPL
22	PMQQLTQPL	Rv3873	Q79F92	205			>50															PMADIAAAL
23	PMADIAAAL	Rv1253	Q11039	225			>50															ALPPRAFEL
24	ALPPRAFEL	Rv3428c	Q50700	212			0,27															AMVNTTTRL
25	AMVNTTTRL	Rv2074	Q10682	209			20															LMGALAVVL
26	LMGALAVVL	Rv2075c	Q10683	211			21															VSNLRTGKL
27	VSNLRTGKL	Rv1967	53968	208			>50															TSADRAVVL
28	TSADRAVVL	Rv1973	53974	203			39															LMHYRGELL
29	LMHYRGELL	Rv1965	53966	201			20															NMMARGMDL
30	NMMARGMDL	Rv0221	P96403	201			>50															LPAERAHEL
31	LPAERAHEL	Rv0222	P96404	202			>50															VMMSEIAGL
32	VMMSEIAGL	Rv1813c	P64889	348			13															TMITFRLRL
33	TMITFRLRL	Rv1733c	P71991	373			2,4															VMTTVLATL
34	VMTTVLATL	Rv1734c	P71992	348			1,8															GMGMVGTAL
35	GMGMVGTAL	Rv1737c	P71995	348			>50															AMAGSIDLL
36	AMAGSIDLL	Rv2006	Q10850	367			34															EMLTSRGLL
37	EMLTSRGLL	Rv1997	P63687	352			>50															QMRACARRL
38	QMRACARRL	Rv2004c	P0A5F9	210			1,5															AMEYFRQVL
39	AMEYFRQVL	Rv2006	Q10850	348			28															SMFAAVQAL
40	SMFAAVQAL	Rv2030c	53475	375			5															HMAQTLGSL
41	HMAQTLGSL	Rv2030c	53475	185			>50															EMGRAPLDL
42	SMFAAVQAL	Rv2030c	53475	357			2,5															RLPAKAPLL
43	EMGRAPLDL	Rv2627c	6185	373			>50															VMAPLGPIL
44	RLPAKAPLL	Rv1484	P0A5Y6		1347		0,03															QLAPGLQLI
45	VMAPLGPIL	Rv1405c	P64841	NA			0,8															RLAPGGTTI
46	QLAPGLQLI	Rv1563c	Q10768		1248		>50															RLANLLPLI
47	RLAPGGTTI	Rv0068	53613		1238		>50															ILPSDAPVL
48	RLANLLPLI	Rv3189	53335		1231		32															VLLPGLPYL
49	ILPSDAPVL	Rv3823c	7800	NA			0,2															REPRRGPRL
50	VLLPGLPYL	Rv3847	P96230		1208		8															RLRPELAGL
51	REPRRGPRL	Rv0142	P96819		1169	1	>50															RELPGRVLL
52	RLRPELAGL	Rv3772	P72039		0,755	3	46															FLLPRGLAI
53	RELPGRVLL	Rv3094c	5773		0,759	4	>50															VMATRRNVL
54	FLLPRGLAI	Rv0056	P66315		0,867	5	>50															RLGRLLNRI
55	VMATRRNVL	Rv1518	Q50590		0,924	6	16															IEPRGAQAL
56	RLGRLLNRI	Rv3737	69704		0,825	7	>50															DLPSRLGKI
57	IEPRGAQAL	Rv0171	7415		0,985	8	>50															RPANLAFFL
58	DLPSRLGKI	Rv3087	53304		0,802	9	>50															FMTRLGPLL
59	RPANLAFFL	Rv1188	50444	NA			1,3															RLASCRDAL
60	FMTRLGPLL	Rv0035	Q7DAJ8		0,829	11	37															RMPPLGHEL
61	RLASCRDAL	Rv2761c	33303		0,775	12	>50															VMAPDAVRI
62	RMPPLGHEL	Rv2997	53244		1,19	13	4															RSCPRLTIL
63	VMAPDAVRI	Rv0324	8446		1014	14	31															RLARRARNI
64	RSCPRLTIL	Rv0894	P64749		0,895	15	>50															RLGLCALAL
65	RLARRARNI	Rv1513	P71792		0,773	16	>50															VLPACLGIL
66	RLGLCALAL	Rv3370c	50399	NA			14															VLRPGGHFL
67	VLPACLGIL	Rv0206c	53657		0,878	18	12															WLPPLLTNL
68	VLRPGGHFL	Rv1523	Q50584		0,767	19	1,8
69	WLPPLLTNL	Rv0249c	53671		0,963	20	39

## Sheet: Lampen et al.
Peptide sequence	Length	Accesion number	Protein name
AAAAALAAA	9	IPI00150057	Isoform 2 of SWI/SNF complex subunit SMARCC2
AAAAPARGL	9	IPI00642734	13 kDa protein
AAAAPLQR	8	IPI00938114	Hypothetical protein XP_002342673
AAAPGSRSL	9	IPI00921415	Zinc finger protein 286B
AAAPPAKEI	9	IPI00021248	Serine/threonine-protein kinase PLK1
AAFAGRATA	9	IPI00027851	cDNA FLJ53927, highly similar to Beta-hexosaminidase alpha chain
AAGAYVHMV	9	IPI00022748	Bax inhibitor 1
AAMEFLQEL	9	IPI00018968	NEDD8-activating enzyme E1 regulatory subunit
AASPSGSQL	9	IPI00239815	Isoform 1 of Cirhin
AAVDAGMAM	9	IPI00179964	Isoform 1 of Polypyrimidine tract-binding protein 1
AAWDKFLSV	9	IPI00217473	Hemoglobin subunit zeta
AGEDPGLAR	9	IPI00027547	Dermcidin
AGYSGQNSM	9	IPI00003881	Heterogeneous nuclear ribonucleoprotein F
AIASGIYLL	9	IPI00024034	Cadherin-4
AIIGGMFTV	9	IPI00006438	Isoform 1 of Endoplasmic reticulum-Golgi intermediate compartment protein 3
AIVDKVPSV	9	IPI00783982	Coatomer subunit gamma
ALADFAELLRA	11	IPI00296141	Dipeptidyl peptidase 2
ALADGVQKV	9	IPI00186903	Isoform 2 of Apolipoprotein L1
ALAPGVRAV	9	IPI00032955	Isoform 1 of RING finger protein 114
ALASLIRSV	9	IPI00007664	Plasma glutamate carboxypeptidase
ALATLIHQV	9	IPI00301419	COP9 signalosome complex subunit 7a
ALDDMISTL	9	IPI00290770	T-complex protein 1 subunit gamma isoform b
ALDNGLFTL	9	IPI00004655	Protein FRG1
ALDPFIPIL	9	IPI00018120	28S ribosomal protein S29, mitochondrial
ALDSTNVEA	9	IPI00429190	cDNA FLJ61136, highly similar to Ras-related protein Rab-11A
ALEPIDITV	9	IPI00006715	Double-strand-break repair protein rad21 homolog
ALESFLKQV	9	IPI00296337	Isoform 1 of DNA-dependent protein kinase catalytic subunit
ALFPAPLAQI	10	IPI00742996	RING finger protein 214
ALFPGVALL	9	IPI00025252	Protein disulfide-isomerase A3
ALGPTGRGV	9	IPI00005751	Serine palmitoyltransferase 2
ALIDRMVNL	9	IPI00019956	DNA damage-inducible transcript 3
ALIEKLVEL	9	IPI00290272	DNA polymerase alpha subunit B
ALIEVPDGFTA	11	IPI00642211	Aminopeptidase B
ALILEPSLYTV	11	IPI00032851	Coatomer subunit zeta-1
ALKDLINEA	9	IPI00021700	Proliferating cell nuclear antigen
ALLDKLYAL	9	IPI00019488	U3 small nucleolar ribonucleoprotein protein IMP3
ALLDRIVSV	9	IPI00783781	Nuclear pore complex protein Nup205
ALLEMDARL	9	IPI00745613	Exosome complex exonuclease RRP41
ALLERGYSL	9	IPI00002520	Serine hydroxymethyltransferase, mitochondrial
ALLLDNMLL	9	IPI00016759	Synaptic vesicular amine transporter
ALLTFMEQV	9	IPI00745313	Isoform 1 of Adipocyte enhancer-binding protein 1
ALMDEVVKA	9	IPI00169383	Phosphoglycerate kinase 1
ALMPKQATV	9	IPI00333696	Isoform 3 of HEAT repeat-containing protein 5B
ALMYESEKV	9	IPI00032831	Synaptosomal-associated protein 29
ALNEKLVNL	9	IPI00654777	cDNA FLJ36192 fis, clone TESTI2027450, highly similar to Eukaryotic translation initiation factor 3 subunit 5
ALNELLQHV	9	IPI00298994	Talin-1
ALPDQGIAKA	10	IPI00019148	Immunoglobulin-binding protein 1
ALPEIFTEL	9	IPI00297982	Eukaryotic translation initiation factor 2 subunit 3
ALPFTKSLSL	10	IPI00382815	Isoform 2 of Protein GPR107
ALQEMVHQV	9	IPI00031407	Enhancer of filamentation 1
ALSDGVHKI	9	IPI00018733	Isoform 1 of Fas apoptotic inhibitory molecule 1
ALSEELVQL	9	IPI00012837	Kinesin-1 heavy chain
ALTGHLEEV	9	IPI00218918	Annexin A1
ALTNAVAHV	9	IPI00410714	Hemoglobin subunit alpha
ALVSAALLL	9	IPI00938337	Hypothetical protein XP_002348164
ALVVQVAEA	9	IPI00012585	Beta-hexosaminidase subunit beta
ALWDIETGQQTV	12	IPI00003348	Guanine nucleotide-binding protein G (I)/G (S)/G (T) subunit beta-2
ALYDENTKL	9	IPI00784013	Tyrosine-protein kinase JAK1
AMADLEQKV	9	IPI00030278	Isoform 1 of TNF receptor-associated factor 2
AMASHLTST	9	IPI00003704	Isoform 1 of RNA-binding protein 4
AMEQSIKSV	9	IPI00069750	Isoform 1 of Poly(U)-binding-splicing factor PUF60
AMFENFVSV	9	IPI00019380	Nuclear cap-binding protein subunit 1
AMFNGGMATT	10	IPI00022826	Isoform 1 of BTB/POZ domain-containing protein 2
AMFNGNYMEA	10	IPI00007132	Rho-related BTB domain-containing protein 3
AMIELVERL	9	IPI00294754	Tripartite motif-containing protein 44
AMLERLLSL	9	IPI00000769	Kinesin-like protein KIF22
AMLGQAEEV	9	IPI00290566	T-complex protein 1 subunit alpha
AMPDSPAEV	9	IPI00021473	Putative uncharacterized protein CBFA2T3
AMPPPPPQGV	10	IPI00006715	Double-strand-break repair protein rad21 homolog
AMPQSGTGV	9	IPI00024821	26S proteasome non-ATPase regulatory subunit 14
AMQDRYMEV	9	IPI00029764	Splicing factor 3A subunit 3
AMTKDNNLL	9	IPI00003865	Isoform 1 of Heat shock cognate 71 kDa protein
AMVDYLQKA	9	IPI00171407	Isoform 1 of Syntaxin-binding protein 5
APPPPPPPP	9	IPI00069084	Isoform 1 of Transformation/transcription domain-associated protein
ARVLSLLEV	9	IPI00383061	Isoform 4 of Protein NLRC5
ASSPEHPEL	9	IPI00062321	OTU domain-containing protein 5 isoform c
ATDPTIHTV	9	IPI00234857	CDNA FLJ58308, highly similar to Alpha-1, 2-mannosyltransferase ALG9
AVALRPAEA	9	IPI00056357	UPF0556 protein C19orf10
AVDGKEMVTM	10	IPI00045946	Isoform 1 of ATP-dependent metalloprotease YME1L1
AVHETLVAV	9	IPI00029337	Isoform 1 of Zinc transporter ZIP3
AVIDVGINRV	10	IPI00011307	Bifunctional methylenetetrahydrofolate dehydrogenase/cyclohydrolase, mitochondrial
CVRPDQCECAPGW	13	IPI00012710	Epidermal growth factor-like protein 8
DDLALLKNL	9	IPI00328715	Protein LYRIC
DINTDGAVNF	10	IPI00007047	Protein S100-A8
DTNADKQL	8	IPI00027462	Protein S100-A9
DTNADKQLS	9	IPI00027462	Protein S100-A9
DTNADKQLSF	10	IPI00027462	Protein S100-A9
EAQEVKTV	8	IPI00008203	F-box only protein 40
EDLMKLII	8	IPI00026466	Isoform 2 of Nipped-B-like protein
EGKLEQTV	8	IPI00386136	Ig lambda chain V-VI region WLT
EGLKFVEGV	9	IPI00002307	Isoform 1 of Neuroligin-3
ENAGEDPGLAR	11	IPI00027547	Dermcidin
FAEGQGRAL	9	IPI00915811	133 kDa protein
FANGRSTGL	9	IPI00003627	Isoform 1 of Actin-like protein 6A
FASHVSPEV	9	IPI00299263	ADP-ribosylation factor GTPase-activating protein 3
FGEMGGKFM	9	IPI00015952	CDNA FLJ59571, highly similar to Eukaryotic translation initiation factor 4gamma 2
FLAEEGFYKF	10	IPI00297492	Dolichyl-diphosphooligosaccharide--protein glycosyltransferase subunit STT3A
FLAPWATIA	9	IPI00001593	Lysosomal Pro-X carboxypeptidase
FLASESLIKQI	11	IPI00412579	60S ribosomal protein L10a
FLDEPTNHL	9	IPI00005045	ATP-binding cassette sub-family F member 2
FLDSEVSEL	9	IPI00106495	Condensin complex subunit 3
FLFDTQHFI	9	IPI00024279	HEAT repeat-containing protein 1
FLFPRSIDV	9	IPI00395903	Transmembrane protein 106B
FLGENISNFL	10	IPI00186903	Isoform 2 of Apolipoprotein L1
FLLDGFPRTV	10	IPI00172460	Isoform 3 of Adenylate kinase 2, mitochondrial
FLLGPRLVLA	10	IPI00028055	Transmembrane emp24 domain-containing protein 10
FLLLPGPSAA	10	IPI00646304	Peptidyl-prolyl cis-trans isomerase B
FLMDFIHQV	9	IPI00291200	Nuclear pore complex protein Nup133
FLQEGDLISA	10	IPI00015905	Exosome complex exonuclease RRP4
FLSEHPNVTL	10	IPI00005531	Isoform 1 of Probable DNA dC->dU-editing enzyme APOBEC-3B
FLSKQQASQV	10	IPI00294004	Vitamin K-dependent protein S
FLSKQQASQVLV	12	IPI00294004	Vitamin K-dependent protein S
FLWKEPATM	9	IPI00007320	Transcription factor 25
FLYPFPLAL	9	IPI00555703	Isoform 1 of Transmembrane protein 41B
FNDPNAKEM	9	IPI00748303	Putative uncharacterized protein ZFR
FQDPVPLTV	9	IPI00005184	Isoform Long of Transcription intermediary factor 1-alpha
FQSMLHPVM	9	IPI00099831	Isoform 1 of Carbohydrate sulfotransferase 11
FVDDYTVRV	9	IPI00024821	26S proteasome non-ATPase regulatory subunit 14
FVFPGELLL	9	IPI00019472	Neutral amino acid transporter B (0)
FVLPELPSV	9	IPI00024660	Isoform 1 of IST1 homolog
GADGVMRTM	9	IPI00006612	Isoform 1 of Clathrin coat assembly protein AP180
GALTPVQA	8	IPI00893857	Isoform 2 of NADH dehydrogenase [ubiquinone] 1 alpha subcomplex subunit 11
GILGIQPPSV	10	IPI00829652	Putative RNA-binding protein 16
GLAARMSQV	9	IPI00782992	Isoform 1 of Serine/arginine repetitive matrix protein 2
GLADKVYFL	9	IPI00301263	CAD protein
GLAEDSPKM	9	IPI00828098	Protein ALO17 isoform 1
GLATDVQTV	9	IPI00028004	Proteasome subunit beta type-3
GLDELFVQV	9	IPI00027035	GPN-loop GTPase 1 isoform a
GLDRLNVTV	9	IPI00018246	Isoform 1 of Hexokinase-1
GLGPPGRSV	9	IPI00396008,	Isoform 1 of Protein SPT2 homolog
GLIDRQVTV	9	IPI00432363	Microtubule-actin cross-linking factor 1, isoform 4
GLIEILKKV	9	IPI00023640	Programmed cell death protein 5
GLIEKNIEL	9	IPI00031519	Isoform 1 of DNA (cytosine-5)-methyltransferase 1
GLMADPMKV	9	IPI00001735	Isoform 1 of Nuclear receptor corepressor 2
GLMEDLLKL	9	IPI00170594	Protein ELYS
GLQEGTHEL	9	IPI00215888	Signal recognition particle 72 kDa protein
GLVDQLVKA	9	IPI00220637	Seryl-tRNA synthetase, cytoplasmic
GMLDGLVNV	9	IPI00293260	Isoform 1 of DnaJ homolog subfamily C member 10
GMMSTVTEV	9	IPI00157790	Proteasome-associated protein ECM29 homolog
GMPDFLEKL	9	IPI00853224	StAR-related lipid transfer protein 7, mitochondrial
GMWGGAMLGV	10	IPI00013419	Isoform 3 of Cysteine and histidine-rich protein 1
GQLLLLSEV	9	IPI00796520	23 kDa protein
GVGPVPARA	9	IPI00006547	T-cell immunomodulatory protein
GVLPNIQAV	9	IPI00014165	Histone H2A
GVYDGEEHSV	10	IPI00006726	Melanoma-associated antigen B2
GVYGDVHRV	9	IPI00159072	Regulator of differentiation 1 isoform 2
GVYGDVQRV	9	IPI00179964	Isoform 1 of Polypyrimidine tract-binding protein 1
GVYGGSVHEA	10	IPI00165579	Isoform 2 of Cytosolic non-specific dipeptidase
HIIENIVAV	9	IPI00008708	Ribosomal L1 domain-containing protein 1
HLDDLKGTFA	10	IPI00554676	Hemoglobin subunit gamma-2
HLIDFMSEI	9	IPI00299507	Condensin complex subunit 2
HLLGDPMANV	10	IPI00007607	Protein YIF1A
HLLNESPML	9	IPI00783781	Nuclear pore complex protein Nup205
HLSNIPPSV	9	IPI00179964	Isoform 1 of Polypyrimidine tract-binding protein 1
HPPPPPPPP	9	IPI00008481	Homeobox protein Hox-D8
HYVTGPAEA	9	IPI00935711	Hypothetical protein XP_002347965
IDAIRIPVL	9	IPI00604795	Abhydrolase domain-containing protein 1
ILDAGGHNV	9	IPI00299608	Isoform 1 of 26S proteasome non-ATPase regulatory subunit 1
ILDESDHITM	10	IPI00306406	Serine/threonine-protein kinase RIO2
ILDESHERV	9	IPI00219871	N-alpha-acetyltransferase 38, NatC auxiliary subunit
ILDPHVVLL	9	IPI00001738	Nuclear pore complex protein Nup88
ILDQKINEV	9	IPI00008497	Ornithine decarboxylase
ILENPPEEMKL	11	IPI00411710	Eukaryotic translation initiation factor 4 gamma, 3
ILLDNDHYAM	10	IPI00410584	Peroxisomal Lon protease homolog 2
ILTDITKGV	9	IPI00186290	Elongation factor 2
IMLEALERV	9	IPI00016572	Small nuclear ribonucleoprotein G
IQVTKVTQV	9	IPI00298520	Coatomer subunit delta variant 2
ISEENFRVM	9	IPI00305289	Kinesin-like protein KIF11
ISIEGNKMPL	10	IPI00296432	Isoform 1 of Protein IWS1 homolog
ITQLNQGVTI	10	IPI00289540	Isoform 2 of Usherin
IVDPFQILV	9	IPI00217362	Isoform 3 of TP53RK-binding protein
IVPPGGHSV	9	IPI00215963	Isoform 1 of Genetic suppressor element 1
KAFTKPEEA	9	IPI00025273	Isoform Long of Trifunctional purine biosynthetic protein adenosine-3
KAHLGTAL	8	IPI00218606	40S ribosomal protein S23
KAPPAPLAA	9	IPI00032491	Inner nuclear membrane protein Man1
KAWENSPNV	9	IPI00083708	Isoform 7 of Protein BAT2-like 2
KDLEVYLQKL	10	IPI00032187	Isoform 1 of Nischarin
KIADFGWSV	9	IPI00176642	Serine/threonine-protein kinase 12
KIAPNTPQL	9	IPI00329352	Nodal modulator 1
KIAQFLESV	9	IPI00167941	Midasin
KIDPTVTMM	9	IPI00021435	26S protease regulatory subunit 7
KIFEMGPVFTL	11	IPI00017510	Cytochrome c oxidase subunit 2
KIGDFGLATV	10	IPI00915308	L-protein KIAA1549: BRAF 16_11
KIGEGTYGV	9	IPI00023503	Cell division protein kinase 3
KIIDEDGLLNL	11	IPI00375358	Isoform 1 of Replication factor C subunit 1
KIIDIQEKV	9	IPI00742682	Nucleoprotein TPR
KILPDLNTV	9	IPI00297241	Nucleolar pre-ribosomal-associated protein 1
KILPTLEAV	9	IPI00005198	Interleukin enhancer-binding factor 2
KILQELPSV	9	IPI00296432	Isoform 1 of Protein IWS1 homolog
KILSELFTV	9	IPI00479641	G2/M phase-specific E3 ubiquitin-protein ligase
KIQEILTQV	9	IPI00165467	Isoform 2 of Insulin-like growth factor 2 mRNA-binding protein 3
KISDFGLATV	10	IPI00023664	Serine/threonine-protein kinase Chk1
KIVDFSYSV	9	IPI00141933	Isoform 1 of Mitotic checkpoint serine/threonine-protein kinase BUB1 beta
KIYEGQVEV	9	IPI00000494	60S ribosomal protein L5
KLDDTYIKA	9	IPI00329629	DnaJ homolog subfamily C member 7
KLDEDVKMI	9	IPI00071697	Isoform 3 of Nuclear transcription factor Y subunit gamma
KLDQDLNEV	9	IPI00219420	Structural maintenance of chromosomes protein 3
KLDSTPLKA	9	IPI00013075	Isoform 1 of Katanin p60 ATPase-containing subunit A1
KLDVGNAEV	9	IPI00218200	B-cell receptor-associated protein 31
KLEEIIHQI	9	IPI00014235	Isoform 1 of Rab3 GTPase-activating protein catalytic subunit
KLFADAVQEL	10	IPI00299904	Isoform 1 of DNA replication licensing factor MCM7
KLFNEFIQL	9	IPI00009471	WD repeat-containing protein 3
KLFPGFEIETV	11	IPI00554777	Asparagine synthetase [glutamine-hydrolyzing]
KLGDIMGV	8	IPI00294211	Pre-mRNA-splicing factor ATP-dependent RNA helicase PRP16
KLGGVVSI	8	IPI00069084	Isoform 1 of Transformation/transcription domain-associated protein
KLGPEGELL	9	IPI00019472	Neutral amino acid transporter B (0)
KLGSVPVTV	9	IPI00006050	Isoform 1 of Protein FAM115A
KLIANNTTV	9	IPI00003627	Isoform 1 of Actin-like protein 6A
KLIDFGSGALL	11	IPI00005014	Isoform 1 of Proto-oncogene serine/threonine-protein kinase pim-1
KLLDTMVDTFL	11	IPI00178359	Isoform 3 of Polyamine-modulated factor 1
KLLEGEESRISL	12	IPI00418471	Vimentin
KLLEPVLLL	9	IPI00221092	40S ribosomal protein S16
KLLEYIEEI	9	IPI00337325	Isoform 1 of Hyaluronan mediated motility receptor
KLMDLDVEQL	10	IPI00021700	Proliferating cell nuclear antigen
KLMEEIREL	9	IPI00398725	Isoform 1 of Zinc finger protein 644
KLMQQQQEV	9	IPI00005184	Isoform Long of Transcription intermediary factor 1-alpha
KLMQVVPQET	10	IPI00008986	Large neutral amino acids transporter small subunit 1
KLNATNIEL	9	IPI00291922	Proteasome subunit alpha type-5
KLNEMSYEL	9	IPI00337544	Isoform 2 of Myomegalin
KLNPQQFEV	9	IPI00297492	Dolichyl-diphosphooligosaccharide--protein glycosyltransferase subunit STT3A
KLQEFLQTL	9	IPI00019447	Isoform 1 of Fanconi anemia group I protein
KLSEMSVTL	9	IPI00604711	Isoform 1 of Kinesin-like protein KIF1A
KLSEYEMSI	9	IPI00171445	Isoform 1 of ATPase family AAA domain-containing protein 1
KLSSLIILM	9	IPI00032140	Serpin H1
KLVEFDFLGA	10	IPI00002135	Transforming acidic coiled-coil-containing protein 3
KLWEAESKL	9	IPI00021095	Protein Mis18-alpha
KLYQEVEIASV	11	IPI00034049	Isoform 1 of Regulator of nonsense transcripts 1
KMADIEYRL	9	IPI00031514	Replication factor C subunit 5
KMAEPFTKA	9	IPI00549861	CDNA FLJ14239 fis, clone NT2RP5003512, highly similar to Exportin-5
KMANSVTDL	9	IPI00396185	N-alpha-acetyltransferase 35, NatC auxiliary subunit
KMDASLGNLFA	11	IPI00334282	Protein FAM3C
KMDPIISRV	9	IPI00020335	Protein BTG2
KMFESFIESV	10	IPI00063234	Protein kinase, cAMP-dependent, regulatory, type II, alpha, isoform CRA_b
KMIEDLQNEL	10	IPI00413265	Structural maintenance of chromosomes protein 5
KMISMDIEQV	10	IPI00021770	Isoform 1 of 3-hydroxy-3-methylglutaryl-coenzyme A reductase
KMLDEILLQL	10	IPI00025616	DNA polymerase delta subunit 2
KMLDFETFL	9	IPI00384992	Myosin light chain 4
KMLEIDPQKV	10	IPI00030363	Acetyl-CoA acetyltransferase, mitochondrial
KMVGDVTGA	9	IPI00008922	Interferon-induced transmembrane protein 2
KMVGDVTGAQA	11	IPI00008922	Interferon-induced transmembrane protein 2
KMVGTTSVV	9	IPI00328200	Glutamine-rich protein 1
KMVTGVASA	9	IPI00554676	Hemoglobin subunit gamma-2
KMYEEFLSKV	10	IPI00021831	CAMP-dependent protein kinase type I-alpha regulatory subunit
KQQASQVLV	9	IPI00294004	Vitamin K-dependent protein S
KQYGNEVFL	9	IPI00302925	59 kDa protein
KTIETSPSL	9	IPI00019447	Isoform 1 of Fanconi anemia group I protein
KTLEGEFSV	9	IPI00014513	Transcriptional repressor protein YY1
KVADALTNA	9	IPI00410714	Hemoglobin subunit alpha
KVAPAPAVV	9	IPI00299573	60S ribosomal protein L7a
KVFDPVPVGV	10	IPI00844578	ATP-dependent RNA helicase A
KVIDEIYRV	9	IPI00008542	F-box only protein 28
KVLDFEHFL	9	IPI00335168	Isoform Non-muscle of Myosin light polypeptide 6
KVLERVNAV	9	IPI00384051	Putative uncharacterized protein PSME2
LAAGPGPSLG	10	IPI00305380	Insulin-like growth factor-binding protein 4
LAAGPSAAA	9	IPI00291755	Isoform 1 of Nuclear pore membrane glycoprotein 210
LADDSVRSL	9	IPI00442171	Isoform 1 of Prolyl endopeptidase-like
LANGQTKVL	9	IPI00007956	Thioredoxin-interacting protein
LAQLLSEV	8	IPI00915308	L-protein KIAA1549: BRAF 16_11
LDTNADKQL	9	IPI00027462	Protein S100-A9
LIKALVENI	9	IPI00001458	Kinetochore-associated protein 1
LLAAARLAAA	10	IPI00025252	Protein disulfide-isomerase A3
LLAEKVEQL	9	IPI00013328	Isoform 1 of Tumor suppressor candidate 3
LLAPPSRPA	9	IPI00464990	Isoform 2 of Platelet glycoprotein Ib beta chain
LLDEPTNHL	9	IPI00005045	ATP-binding cassette sub-family F member 2
LLDHPRAEV	9	Isoform Long of Armadillo repeat protein deleted in velo-cardio-facial syndrome
LLDPSVFHV	9	Nucleolar complex protein 4 homolog
LLDPTNVFI	9	Isoform 1 of Sideroflexin-4
LLDRFLATV	9	Cyclin-I
LLDVTPLSL	9	Isoform 1 of Heat shock cognate 71 kDa protein
LLFEGEKITI	10	Isoform 2 of DNA-directed RNA polymerase II subunit RPB11-b1
LLGNVLVTV	9	Hemoglobin subunit gamma-2
LLGPAGARA	9	Isoform 1 of Proprotein convertase subtilisin/kexin type 9
LLGPRLVLA	9	Transmembrane emp24 domain-containing protein 10
LLHSGVENMQV	11	Transmembrane protein FLJ37396
LLIDDEYKV	9	Putative uncharacterized protein KIAA0090
LLLDVPTAAV	10	Gamma-interferon-inducible lysosomal thiol reductase
LLLDVPTAAVQA	12	Gamma-interferon-inducible lysosomal thiol reductase
LLLNLAPAPLNA	12	Isoform Alpha of Tissue factor pathway inhibitor
LLLNLDDSFS	10	Isoform 1 of Transmembrane channel-like protein 3
LLLPGPSAA	9	Peptidyl-prolyl cis-trans isomerase B
LLLPLPVPA	9	Perforin-1
LLLPPPPCPA	10	Plasma alpha-L-fucosidase
LLLPPQPALA	10	Isoform Somatic-1 of Angiotensin-converting enzyme
LLNSEVHML	9	DNA-directed RNA polymerase II subunit RPB4
LLPPQPALA	9	Isoform Somatic-1 of Angiotensin-converting enzyme
LLSENHSTV	9	Uncharacterized protein C16orf73
LLYQEGAKMAV	11	Junction plakoglobin
LMAEMGVHSV	10	Isoform 1 of Uridine-cytidine kinase-like 1
LMDPNSPERV	10	Protein of unknown function DUF410 family protein
LMTKEISSV	9	Isoform 1 of DNA-dependent protein kinase catalytic subunit
LMVDHVTEV	9	cDNA FLJ30398 fis, clone BRACE2008402, highly similar to Steroid receptor RNA activator 1
LNETGDEPFQYK	12	Glutamine synthetase
LPMISFLIL	9	Isoform 2 of Rho guanine nucleotide exchange factor 16
LQYSVEVQV	9	Hemicentin 2
LSDNIISGGL	10	Acidic leucine-rich nuclear phosphoprotein 32 family member E
LSLTEASLQKL	11	CDNA, FLJ79037, highly similar to Myosin-10
LVMQGVSRA	9	Interferon gamma receptor 1
LWTALLFL	8	Baculoviral IAP repeat-containing protein 6
MAPPAHKSI	9	Isoform 2 of Uncharacterized protein C10orf18
MDKAKASPL	9	Caspase recruitment domain-containing protein 14
MEGISNVIQN	10	Fasciculation and elongation protein zeta-2 isoform 2
MEMSLKVLE	9	Isoform 1 of Mirror-image polydactyly gene 1 protein
MITLLLPIL	9	Family with sequence similarity 38, member B
MLALLTQVA	9	Beta-hexosaminidase subunit beta
MLIGEIFEL	9	Isoform 1 of Autophagy-related protein 9A
MLLSVPLLLG	10	Calreticulin
MLTELEKAL	9	Protein S100-A8
MLVLCASTEL	10	29 kDa protein
MMLDDLLQL	9	T-complex protein 1 subunit eta
MNVAEVDKV	9	40S ribosomal protein S21
MTSEIHNTV	9	Centromere/kinetochore protein zw10 homolog
MVDGTLLLL	9	Major histocompatibility complex, class I, E precursor
NADPQAVTM	9	Isoform 1 of Melanoma-associated antigen D2
NIFPNPEATFV	11	FACT complex subunit SPT16
NIVEKLREV	9	Putative uncharacterized protein TRIM5
NLAEKLIGV	9	Isoform 1 of Ral GTPase-activating protein subunit beta
NLAEKPKTV	9	Proteasome-associated protein ECM29 homolog
NLAENISRV	9	Glycogen phosphorylase, brain form
NLAPAPLNA	9	Isoform Alpha of Tissue factor pathway inhibitor
NLASFIEQV	9	Pterin-4-alpha-carbinolamine dehydratase
NLDPAVHEV	9	GPN-loop GTPase 1 isoform a
NLIDLDDLYV	10	THO complex subunit 2
NLLEQFILL	9	Isoform 1 of COP9 signalosome complex subunit 7b
NLLKLIAEV	9	Kinetochore protein Spc25
NLMEQPIKV	9	Junction plakoglobin
NLYPFVKTV	9	Bifunctional purine biosynthesis protein PURH
NMFGTKFETV	10	55 kDa erythrocyte membrane protein
NMVAKVDEV	9	60S ribosomal protein L10a
NMVDIIHSV	9	Propionyl-CoA carboxylase beta chain, mitochondrial
NMYGKVVTV	9	Isoform 1 of Transcription elongation factor SPT5
NTIDPSHPM	9	Alanyl-tRNA synthetase, cytoplasmic
PHPPPPPPP	9	Homeobox protein Hox-D8
PSIPRLAK	8	Isoform 2 of Protein hairless
PSPPPPPPP	9	Putative uncharacterized protein PRR12
QILPNGPILQ	10	Cyclin-dependent kinase-like 4
QLFSEIHNL	9	Isoform 1 of CDK5 regulatory subunit-associated protein 2
QLYRGLGGQL	10	Isoform 4 of Tubulin-specific chaperone D
QMFEGPLAL	9	YrdC domain-containing protein, mitochondrial
QSPSANVL	8	Baculoviral IAP repeat-containing protein 6
QVENGGVLG	9	Isoform R-type of Pyruvate kinase isozymes R/L
RAVAPTMSL	9	Isoform 1 of Transcription cofactor vestigial-like protein 4
RFLLMMLSM	9	12 kDa protein
RIADQFLGA	9	Isoform 2 of Lysine-specific histone demethylase 1A
RIIDVVYNA	9	40S ribosomal protein S8
RLAPSMAMV	9	Isoform 1 of Histone-lysine N-methyltransferase MLL2
RLAQAMETA	9	Isoform 1 of E3 ubiquitin-protein ligase Praja-2
RLDELGGVYL	10	Dolichyl-diphosphooligosaccharide--protein glycosyltransferase subunit 2
RLDSTGVNV	9	Isoform 2 of Protein FAM72A
RLFADILNDV	10	Isoform 1 of UPF0420 protein C16orf58
RLFNDPVAMV	10	Dolichyl-P-Man:Man(5)GlcNAc(2)-PP-dolichyl mannosyltransferase
RLIEEENML	9	Gamma-tubulin complex component 4
RLLENMTEV	9	Isoform 1 of Pyridoxal-dependent decarboxylase domain-containing protein 1
RLMDPPSNEA	10	Isoform 1 of Probable ATP-dependent RNA helicase DHX36
RLMDPPSNEAV	11	Isoform 1 of Probable ATP-dependent RNA helicase DHX36
RLMNDMTAV	9	Isoform Beta of Heat shock protein 105 kDa
RLPDDDPTAV	10	Coatomer subunit gamma-2
RLPPDFFGV	9	Isoform 2 of WD repeat-containing protein 24
RLQDELVTL	9	Isoform 2 of Microtubule-actin cross-linking factor 1, isoforms 1/2/3/5
RLQEELEKL	9	Isoform 3 of Ribosome-binding protein 1
RLWGEPVNL	9	Probable ubiquitin carboxyl-terminal hydrolase FAF-X isoform 4
RLWPKIQGL	9	DNA damage-inducible transcript 4 protein
RLYDPASGTISL	12	ATP-binding cassette sub-family B member 10, mitochondrial
RLYQGINQL	9	cDNA FLJ51069, highly similar to DNA mismatch repair protein Msh2
RMAPALSGA	9	Isoform 1 of Serine/arginine repetitive matrix protein 2
RMAVLNEQV	9	Isoform 1 of Nuclear autoantigenic sperm protein
RMDGAVTSV	9	Isoform 1 of Nuclear receptor coactivator 1
RMWEDPMGA	9	A-kinase anchor protein 8-like
RTFDETVSTYV	11	Targeting protein for Xklp2
RVIGTLEEV	9	Ran GTPase-activating protein 1
RVLPPSALQSV	11	Serine/threonine-protein kinase 12
RVMELFFTV	9	Exportin-4
RVPPPPPIA	9	Heterogeneous nuclear ribonucleoprotein C-like 1
RVPPPPQSV	9	SHC-transforming protein 1 isoform 3
RVSDINFTL	9	Isoform 4 of Serine/threonine-protein phosphatase 6 regulatory subunit 3
SADDVIKM	8	Isoform 2 of Kinesin-like protein KIF2C
SADEPMTTF	9	DNA-directed RNA polymerase III subunit RPC10
SADFETVRM	9	Actin-related protein 2
SADKPLSNM	9	Poly [ADP-ribose] polymerase 1
SAIASTKVM	9	Armadillo repeat-containing protein 1
SAIDRIFTL	9	Isoform 1 of SET domain-containing protein 3
SAQGKPLAL	9	Ran GTPase-activating protein 1
SATSLPQTV	9	Cyclic AMP-dependent transcription factor ATF-1
SAYDNVNKV	9	Mitogen-activated protein kinase 1
SFLVACVIL	9	Isoform 1 of Transmembrane protein C15orf27
SIADKIQQI	9	Probable dimethyladenosine transferase
SIAEVVHQL	9	Cyclin-G-associated kinase
SIAQIISSV	9	166 kDa protein
SIIGRLLEV	9	Serine/threonine-protein phosphatase PP1-alpha catalytic subunit
SIIQRLLEV	9	Isoform Gamma-1 of Serine/threonine-protein phosphatase PP1-gamma catalytic subunit
SILEDPPSI	9	cDNA FLJ10360 fis, clone NT2RM2001247
SIMTFIKEL	9	Isoform 1 of Uncharacterized protein C7orf58
SIYNGDMEKI	10	BCL2/adenovirus E1B 19 kDa protein-interacting protein 3
SLADDSVLERL	11	Midasin
SLADFMQEV	9	Isoform 1 of CCR4-NOT transcription complex subunit 1
SLAEFVQSL	9	Ubiquitin carboxyl-terminal hydrolase 7
SLAEVLQQL	9	Isoform 1 of All-trans-retinol 13,14-reductase
SLAEYIDMI	9	Intraflagellar transport protein IFT46 isoform 1
SLAKIYTEA	9	Histone H1x
SLAQMVSGL	9	Isoform 1 of Large proline-rich protein BAT3
SLAQYLINA	9	Poly (rC)-binding protein 1
SLAQYLINV	9	Poly (rC) binding protein 2 isoform b
SLDALLSQV	9	Isoform 2 of Mediator of RNA polymerase II transcription subunit 8
SLDKFLASV	9	Hemoglobin subunit alpha
SLDKTSPEM	9	Isoform 1 of Telomere-associated protein RIF1
SLDQPTQTV	9	Eukaryotic translation initiation factor 3 subunit C
SLEELLHYV	9	cDNA FLJ36746 fis, clone UTERU2016757
SLFAGGMLRV	10	Transmembrane emp24 domain-containing protein 9
SLFDIISKI	9	Tubulin epsilon chain
SLFERLVVL	9	Isoform 1 of Regulator of nonsense transcripts 1
SLFPGQVVI	9	DNA polymerase alpha subunit B
SLHDMKTVV	9	Isoform 1 of Transformation/transcription domain-associated protein
SLIEDLILL	9	Isoform 1 of SET and MYND domain-containing protein 3
SLINVGLISV	10	Isoform 1 of Acidic leucine-rich nuclear phosphoprotein 32 family member B
SLITRLLEV	9	Serine/threonine-protein phosphatase PP1-beta catalytic subunit
SLLDEFYKL	9	Isoform 1 of Caprin-1
SLLDIIEKV	9	Isoform 1 of Tuberin
SLLDKIIGA	9	Isoform 1 of Polymerase I and transcript release factor
SLLDLEQKL	9	Peroxisomal biogenesis factor 3
SLLDLPLSL	9	N-acetylglucosaminyl-phosphatidylinositol de-N-acetylase
SLLDRFLATV	10	Cyclin-I
SLLEKSLGL	9	Eukaryotic translation elongation factor 1 epsilon-1
SLLENLEKI	9	Heterogeneous nuclear ribonucleoprotein C-like 1
SLLHLGALYGI	11	Acyl-CoA desaturase
SLLPFLKAV	9	Splicing factor 3B subunit 1
SLLPPDALVGL	11	Protein transport protein Sec23B
SLLQHLIGL	9	Melanoma antigen preferentially expressed in tumors
SLLSHVEQL	9	Mitotic spindle assembly checkpoint protein MAD2B
SLMDPDTKL	9	Actin-related protein 2/3 complex subunit 3
SLMTKEISSV	10	Isoform 1 of DNA-dependent protein kinase catalytic subunit
SLNGRIINV	9	Uncharacterized protein C16orf73
SLQDMASRV	9	COP9 signalosome complex subunit 3
SLQEEIAFL	9	Vimentin
SLQSTILGV	9	Peroxisomal Lon protease homolog 2
SLSEKTVLL	9	CD59 glycoprotein
SLTGHISTV	9	Isoform 1 of Pleiotropic regulator 1
SLTGRLDEV	9	Isoform 1 of Signal transducer and activator of transcription 6
SLYEMVSRV	9	FACT complex subunit SSRP1
SMADIPLGFGV	11	Isoform 1 of 60S ribosome subunit biogenesis protein NIP7 homolog
SMAEVDAAMAA	11	Isoform B1 of Heterogeneous nuclear ribonucleoproteins A2/B1
SMAKAITGV	9	Serine/threonine-protein kinase TBK1
SMFGKLIDL	9	CDNA FLJ55475
SMLEDVQRA	9	RNA-binding protein 28
SMLPTLREA	9	Peroxisomal biogenesis factor 3
SMMDPNHFL	9	Isoform 4 of E3 ubiquitin-protein ligase UBR2
SMMDVDHQI	9	T-complex protein 1 subunit epsilon
SMTNFISGL	9	RING finger and WD repeat domain-containing protein 3
SMVDVVMLL	9	Isoform 1 of Large proline-rich protein BAT3
SMYGVDLHHA	10	Band 4.1-like protein 2
SMYGVDLHKA	10	Isoform 1 of Protein 4.1
SPPPPPPPP	9	Isoform 1 of Protein virilizer homolog
SQDPTMIGV	9	26S proteasome non-ATPase regulatory subunit 5
SQYPEIIFL	9	Isoform 1 of Zinc phosphodiesterase ELAC protein 2
SVDSKPPVI	9	Isoform 1 of Rho guanine nucleotide exchange factor 18
SVHPSIPASVHA	12	HCG1778991, isoform CRA_b
SVIEQLFFV	9	COUP transcription factor 1
SVLGKVNEI	9	Dynactin subunit 2
SVLKSIQEV	9	Superkiller viralicidic activity 2-like 2
TIDPNTRTL	9	Nucleolar GTP-binding protein 1
TIIDKSKSV	9	Hydroxymethylglutaryl-CoA synthase, cytoplasmic
TLADIIARL	9	Isoform 1 of Protein NYNRIN
TLADVLYHV	9	Isoform 1 of Set1/Ash2 histone methyltransferase complex subunit ASH2
TLAETLVNL	9	Serine/threonine-protein phosphatase 6 regulatory ankyrin repeat subunit C
TLAGVIDLA	9	H (+)/Cl(-) exchange transporter 4
TLAKYLMEL	9	G2/mitotic-specific cyclin-B2
TLAQRVKEV	9	Isoform Long of Ancient ubiquitous protein 1
TLDEKIEKV	9	Probable ATP-dependent RNA helicase DDX27
TLIDLPGITKV	11	Isoform 1 of Dynamin-2
TLISELVQA	9	Cullin-7
TLITDGMRSV	10	Cleavage and polyadenylation specificity factor subunit 1
TLLEDGTFKV	10	NmrA-like family protein
TLLHAGGLARA	11	Extracellular leucine-rich repeat and fibronectin type-III domain-containing protein 1
TLNDIMTRV	9	Isoform 2 of Nuclear factor related to kappa-B-binding protein
TLPPESTQV	9	Isoform Long of Deoxyhypusine synthase
TLQEFLERI	9	Isoform 2 of SAM domain-containing protein SAMSN-1
TLSDIMVSL	9	Testis-expressed sequence 10 protein
TLTEEGVIKV	10	Nucleolar GTP-binding protein 1
TLVDEVFRI	9	Isoform 1 of Replication protein A 32 kDa subunit
TLVDFPLHL	9	Isoform 1 of MAP kinase-activating death domain protein
TLVDNISTMAL	11	Acyl-coenzyme A thioesterase 13
TLVQSTLTLQL	11	Similar to Olfactory receptor Olfr1361
TLVYHVVGV	9	Isoform 2 of Splicing factor 3B subunit 3
TLYEAVREV	9	60S ribosomal protein L10a
TMAKESSIIGV	11	Quinone oxidoreductase
TMIDFPQMV	9	Serine/threonine-protein kinase RIO2
TQPAEKDTV	9	Matrix-remodeling-associated protein 5
TSDMPGTTL	9	HSPC185
TVMDSKIVQV	10	Importin subunit alpha-1
TVMGKIFAV	9	Kelch-like protein 8
TVSTVGISII	10	Isoform 1 of Protein VPRBP
VADPETRTV	9	Bifunctional polynucleotide phosphatase/kinase
VAEENTRVL	9	Isoform 1 of Ubiquitin carboxyl-terminal hydrolase 16
VAIDAGHESFL	11	Cathepsin L1
VASEKESVM	9	Neutral amino acid transporter B (0)
VEDAAALKA	9	Isoform 1 of Protein unc-45 homolog A
VGDPGQRTL	9	Isoform 2 of AT-rich interactive domain-containing protein 1A
VGDPSVHLL	9	Isoform 2 of F-box/LRR-repeat protein 19
VGSAVGHVM	9	Coiled-coil-helix-coiled-coil-helix domain-containing protein 10, mitochondrial
VIAEILRGV	9	Nucleolar protein 56
VIANEIEKV	9	Isoform 1 of Apolipoprotein L4
VLDDKLVFV	9	Anoctamin-6
VLESSNPKM	9	Isoform 3 of Kinase suppressor of Ras 1
VLFENTDSVHL	11	Isoform 1 of RNA-binding protein 34
VLFSSPPVILL	11	Isoform 1 of Major prion protein
VLGKVNEI	8	Dynactin subunit 2
VLIDDLTTL	9	Isoform 3 of Protein MTO1 homolog, mitochondrial
VLIDYQRNV	9	Exportin-1
VLIGEFLEKV	10	Isoform 2 of mRNA cap guanine-N7 methyltransferase
VLIPKLPQL	9	Isoform 1 of ORM1-like protein 3
VLLAAGPSAA	10	Isoform 1 of Nuclear pore membrane glycoprotein 210
VLLPKVVNT	9	UPF0480 protein C15orf24
VLLQVVPSSA	10	Tumor necrosis factor receptor superfamily member 10A
VLMKDVQEI	9	Protein LLP homolog
VLMTEDIKL	9	87 kDa protein
VLSDIIQNL	9	Nck-associated protein 1-like
VLVNDFFLV	9	Eukaryotic translation initiation factor 3 subunit E
VLWDRTFSL	9	Isoform Alpha of Signal transducer and activator of transcription 1-alpha/beta
VMDPKQMNV	9	Plasma glutamate carboxypeptidase
VMDSKIVQV	9	Importin subunit alpha-1
VMFKEPVEV	9	Isoform 1 of BTB/POZ domain-containing protein 2
VMKALFDL	8	cDNA FLJ27040 fis, clone SLV08542
VMLEYVERA	9	cDNA FLJ56037, highly similar to Cullin-2
VMQETIRNL	9	Zinc finger protein 823
VMQGVSRAEM	10	Interferon gamma receptor 1
VNLGGSKSISIS	12	Keratin, type II cytoskeletal 1
VQGLAAAA	8	Protein FAM83E
VQIEEVRQV	9	Interleukin enhancer-binding factor 2
VRIASLEVE	9	Isoform 1 of Elongation factor 1-delta
VSDDGTLHM	9	RNA-binding protein NOB1
VSQVGKEL	8	DNA damage-inducible transcript 4 protein
VTVPPGPSL	9	Isoform Rpn10A of 26S proteasome non-ATPase regulatory subunit 4
WLIEDGKVVTV	11	Nuclear migration protein nudC
YAEMGTRTF	9	UDP-glucose: glycoprotein glucosyltransferase 2
YAYDGKDYI	9	HLA class I histocompatibility antigen, A-23 alpha chain
YAYDGKDYIA	10	HLA class I histocompatibility antigen, A-23 alpha chain
YIKDGITRV	9	Isoform 1 of Kinesin-like protein KIF1A
YLADIFTKL	9	Zinc finger BED domain-containing protein 5
YLANGQTKV	9	Thioredoxin-interacting protein
YLDEYIARM	9	Isoform 1 of Tuberin
YLDPAQQNL	9	Similar to hCG1725380
YLDPAQRGV	9	Isoform 2 of UPF0585 protein C16orf13
YLDPNQRDL	9	zinc finger protein 573 isoform 3
YLGQVAIL	8	Dynein light chain 1, cytoplasmic
YLLPAIVHI	9	Probable ATP-dependent RNA helicase DDX5
YLVSEIFKA	9	Ammonium transporter Rh type A
YLYPDITRL	9	Sodium- and chloride-dependent taurine transporter
YMAELIERL	9	Geminin
YMDQWVPVI	9	Growth arrest and DNA damage-inducible protein GADD45 alpha
YMIAHITGL	9	Thymidylate synthetase, isoform CRA_a
YQIPRTFTL	9	Isoform 1 of GRB2-associated-binding protein 2
YSDDIPHAL	9	Eukaryotic translation initiation factor 3 subunit E
YSLDHISSL	9	Isoform 1 of Nuclear pore complex protein Nup160
YSVSAQSSM	9	Diphosphoinositol polyphosphate phosphohydrolase 1

## Sheet: Kraemer et al.
Peptide sequence	Length
TLQASNQSEIIQKQVV	16
ILDLSSMAPQALVQFW	16
TRIFGDALASIKQQAQ	16
RMGLAKVSLSPVITEM	16
GGIVTLSQAAGDVDAR	16
IKDDEKEAEEGEDDRD	16
VPRLGSTFSLDTSMS	15
HLIGIHFTGCSMNPA	15
VVTGNMGSNDKVGDF	15
LVDSGAQVSVVHPNL	15
LGHPDTLNQGEFKEL	15
GRCIQMWFDSAQGN	14
MSFLWPVHAEPNPD	14
APIVGGEMAVLALL	14
GQGSNGQGSSSHSS	14
LTPFPGPGPRRPPW	14
YRSGGGFSSGSAGI	14
SLINNHIPCLISG	13
PKKTESHHKAKGK	13
DVHDGKVVSTHEQ	13
ASGYVSSADLVFT	13
LDGKVISFEGCAV	13
VSEKGTVQQADE	12
PRVMTPPSDEPD	12
AVTFSSLPAAIT	12
GPQRCGWPDGLG	12
PSLTSVTTTFV	11
SKGKIYPVGY	10
PGHCEDVLVL	10
APPPPEPAL	9
QPHPGDQSE	9
ILNFPPPP	8
IVESRPVP	8
IIAIFGPG	8
MKAAPGVE	8
AAVLEYL	7

## Sheet: McMurtrey et al.
Peptide sequence	Length
VMAPRTLVL	9
VMAPRTLVL	9
VMAPRTLV	8
VMAPRTLV	8
MAPRTLVL	8
MAVMAPRTLVL	11
MAPRTLVL	8
VMAPRTLV	8
APRTLVL	7
VMAPRTL	7
VMAPRTLVLLL	11
VTAPRTLLL	9
RVTAPRTLLL	10
VMAPRTLIL	9
VMAPRTLIL	9
VMAPRTLIL	9
VMAPRTLI	8
VMAPRTLI	8
RVMAPRTLIL	10
RVMAPRTLIL	10
RVMAPRTLIL	10
MAPRTLIL	8
VMAPRTLI	8

## Sheet: Hogan et al.
Peptide sequence	Length
ASNENMETM	9
IYSTVASSL	9
TYQRTRALV	9
MSLLGKTQIL	10
MSLLERIPIL	10
MYLLERIPIL	10
VSLQERTQIL	10
MSLQGRTLIL	10
SSLENFRAYV	10

## Sheet: Almazán et al. 
Peptide sequence	Length
TSGSDSDEELVTTER	15
KAESTVAPEEDTDED	15
SEVENVSVNVHNPTG	15
TGGGAMAGASTSAGR	15
TPRVTGGGAMAGAST	15
TVAPEEDTDEDSDNE	15
ARNLVPMVATVQGQN	15
EEDTDEDSDNEIHNP	15
TLGSDVEEDLTMTRN	15
TGGGAMAGASTSAGR	15
DSDEELVTTERICTPR	16

## Sheet: Summary
																Four-way Venn in Figure 2D
		Non-MS	Length		MS-based	Length		Non-MS by others than Joosten et al.		Seq Length	Non-MS	Non-MS%	MS-based	MS-based%		4 IDs	1 ID	16 IDs	67 IDs
		VMAPRTLVL	9		VMAPRTLVL	9		VMAPRTLVL		7	0	0	3	0.475436		VMAPRTLIL	RLPAKAPLL	SQAPLPCVL	SMADRAENL
		VMAPRTLIL	9		VMAPRTLLL	9		VMAPRTLIL		8	0	0	27	4.27892		VMAPRTLLL		SQAQLPCLV	SMAGRAGQL
		VMAPRTLLL	9		VMAPRTLFL	9		VMAPRTLLL		9	87	98.8636	424	67.1949		VMAPRTLFL		YLLPRRGPRL	IMANRAQVL
		SQAPLPCVL	9		VTAPRTLLL	9		SQAPLPCVL		10	1	1.13636	91	14.4216		VMAPRTLVL		PEIVIYDYM	KMNAKAATL
		SQAQLPCLV	9		VMAPRTLIL	9		SQAQLPCLV		11	0	0	39	6.18067				AISPRTLNA	QMKFYAVAL
		VMAPRTLFL	9		VTAPRTVLL	9		VMAPRTLFL		12	0	0	14	2.2187				VMAPRALLL	PMKRTALAL
		YLLPRRGPRL	10		VMAPRTVLL	9		YLLPRRGPRL		13	0	0	6	0.950872				QMRPVSRVL	GMNVTAPAL
		PEIVIYDYM	9		PELAKSAPAPK	11		PEIVIYDYM		14	0	0	6	0.950872				SQQPYLQLQ	VMADRTRHL
		AISPRTLNA	9		VGGTSDVEVNEK	12		AISPRTLNA		15	0	0	14	2.2187				GMQFDRGYL	WMCDRAVDL
		VMAPRALLL	9		ALALVRMLI	9		VMAPRALLL		16	0	0	7	1.10935				AMLQDIATL	LMVVRALFL
		QMRPVSRVL	9		GMKFDRGYI	9		QMRPVSRVL										KMLRGVNVL	EMVLRADQL
		SQQPYLQLQ	9		AMAPRTLLL	9		SQQPYLQLQ										VEGEALATL	DMLGRAGGL
		RLPAKAPLL	9		RRYQKSTEL	9		RLPAKAPLL										AAVEELKAL	MMKYLAFGL
		GMQFDRGYL	9		TLQASNQSEIIQKQVV	16		GMQFDRGYL										AVAKAGKPL	RMAATAQVL
		AMLQDIATL	9		ILDLSSMAPQALVQFW	16		AMLQDIATL										KLQERVAKL	FLAADALVL
		KMLRGVNVL	9		TRIFGDALASIKQQAQ	16		KMLRGVNVL										LLPRRGPRL	VEAFRTRPL
		VEGEALATL	9		RMGLAKVSLSPVITEM	16		VEGEALATL											LMGAEADAL
		AAVEELKAL	9		GGIVTLSQAAGDVDAR	16		AAVEELKAL											GLDSRAYRL
		AVAKAGKPL	9		IKDDEKEAEEGEDDRD	16		AVAKAGKPL											GLDARAYRL
		KLQERVAKL	9		VPRLGSTFSLDTSMS	15		KLQERVAKL											PMAPLAPLL
		LLPRRGPRL	9		HLIGIHFTGCSMNPA	15		LLPRRGPRL											EMKTDAATL
		SMADRAENL	9		VVTGNMGSNDKVGDF	15													PMQQLTQPL
		SMAGRAGQL	9		LVDSGAQVSVVHPNL	15													PMADIAAAL
		IMANRAQVL	9		LGHPDTLNQGEFKEL	15													ALPPRAFEL
		KMNAKAATL	9		GRCIQMWFDSAQGN	14													AMVNTTTRL
		QMKFYAVAL	9		MSFLWPVHAEPNPD	14													LMGALAVVL
		PMKRTALAL	9		APIVGGEMAVLALL	14													VSNLRTGKL
		GMNVTAPAL	9		GQGSNGQGSSSHSS	14													TSADRAVVL
		VMADRTRHL	9		LTPFPGPGPRRPPW	14													LMHYRGELL
		WMCDRAVDL	9		YRSGGGFSSGSAGI	14													NMMARGMDL
		LMVVRALFL	9		SLINNHIPCLISG	13													LPAERAHEL
		EMVLRADQL	9		PKKTESHHKAKGK	13													VMMSEIAGL
		DMLGRAGGL	9		DVHDGKVVSTHEQ	13													TMITFRLRL
		MMKYLAFGL	9		ASGYVSSADLVFT	13													VMTTVLATL
		RMAATAQVL	9		LDGKVISFEGCAV	13													GMGMVGTAL
		FLAADALVL	9		VSEKGTVQQADE	12													AMAGSIDLL
		VEAFRTRPL	9		PRVMTPPSDEPD	12													EMLTSRGLL
		LMGAEADAL	9		AVTFSSLPAAIT	12													QMRACARRL
		GLDSRAYRL	9		GPQRCGWPDGLG	12													AMEYFRQVL
		GLDARAYRL	9		PSLTSVTTTFV	11													SMFAAVQAL
		PMAPLAPLL	9		SKGKIYPVGY	10													HMAQTLGSL
		EMKTDAATL	9		PGHCEDVLVL	10													EMGRAPLDL
		PMQQLTQPL	9		APPPPEPAL	9													VMAPLGPIL
		PMADIAAAL	9		QPHPGDQSE	9													QLAPGLQLI
		ALPPRAFEL	9		ILNFPPPP	8													RLAPGGTTI
		AMVNTTTRL	9		IVESRPVP	8													RLANLLPLI
		LMGALAVVL	9		IIAIFGPG	8													ILPSDAPVL
		VSNLRTGKL	9		MKAAPGVE	8													VLLPGLPYL
		TSADRAVVL	9		AAVLEYL	7													REPRRGPRL
		LMHYRGELL	9		SLQGRTLIL	9													RLRPELAGL
		NMMARGMDL	9		ASNENMETM	9													RELPGRVLL
		LPAERAHEL	9		IYSTVASSL	9													FLLPRGLAI
		VMMSEIAGL	9		TYQRTRALV	9													VMATRRNVL
		TMITFRLRL	9		MSLLGKTQIL	10													RLGRLLNRI
		VMTTVLATL	9		MSLLERIPIL	10													IEPRGAQAL
		GMGMVGTAL	9		MYLLERIPIL	10													DLPSRLGKI
		AMAGSIDLL	9		VSLQERTQIL	10													RPANLAFFL
		EMLTSRGLL	9		MSLQGRTLIL	10													FMTRLGPLL
		QMRACARRL	9		SSLENFRAYV	10													RLASCRDAL
		AMEYFRQVL	9		AAAAALAAA	9													RMPPLGHEL
		SMFAAVQAL	9		AAAAPARGL	9													VMAPDAVRI
		HMAQTLGSL	9		AAAAPLQR	8													RSCPRLTIL
		EMGRAPLDL	9		AAAPGSRSL	9													RLARRARNI
		VMAPLGPIL	9		AAAPPAKEI	9													RLGLCALAL
		QLAPGLQLI	9		AAFAGRATA	9													VLPACLGIL
		RLAPGGTTI	9		AAGAYVHMV	9													VLRPGGHFL
		RLANLLPLI	9		AAMEFLQEL	9													WLPPLLTNL
		ILPSDAPVL	9		AASPSGSQL	9
		VLLPGLPYL	9		AAVDAGMAM	9
		REPRRGPRL	9		AAWDKFLSV	9
		RLRPELAGL	9		AGEDPGLAR	9
		RELPGRVLL	9		AGYSGQNSM	9
		FLLPRGLAI	9		AIASGIYLL	9
		VMATRRNVL	9		AIIGGMFTV	9
		RLGRLLNRI	9		AIVDKVPSV	9
		IEPRGAQAL	9		ALADFAELLRA	11
		DLPSRLGKI	9		ALADGVQKV	9
		RPANLAFFL	9		ALAPGVRAV	9
		FMTRLGPLL	9		ALASLIRSV	9
		RLASCRDAL	9		ALATLIHQV	9
		RMPPLGHEL	9		ALDDMISTL	9
		VMAPDAVRI	9		ALDNGLFTL	9
		RSCPRLTIL	9		ALDPFIPIL	9
		RLARRARNI	9		ALDSTNVEA	9
		RLGLCALAL	9		ALEPIDITV	9
		VLPACLGIL	9		ALESFLKQV	9
		VLRPGGHFL	9		ALFPAPLAQI	10
		WLPPLLTNL	9		ALFPGVALL	9
					ALGPTGRGV	9
					ALIDRMVNL	9
					ALIEKLVEL	9
					ALIEVPDGFTA	11
					ALILEPSLYTV	11
					ALKDLINEA	9
					ALLDKLYAL	9
					ALLDRIVSV	9
					ALLEMDARL	9
					ALLERGYSL	9
					ALLLDNMLL	9
					ALLTFMEQV	9
					ALMDEVVKA	9
					ALMPKQATV	9
					ALMYESEKV	9
					ALNEKLVNL	9
					ALNELLQHV	9
					ALPDQGIAKA	10
					ALPEIFTEL	9
					ALPFTKSLSL	10
					ALQEMVHQV	9
					ALSDGVHKI	9
					ALSEELVQL	9
					ALTGHLEEV	9
					ALTNAVAHV	9
					ALVSAALLL	9
					ALVVQVAEA	9
					ALWDIETGQQTV	12
					ALYDENTKL	9
					AMADLEQKV	9
					AMASHLTST	9
					AMEQSIKSV	9
					AMFENFVSV	9
					AMFNGGMATT	10
					AMFNGNYMEA	10
					AMIELVERL	9
					AMLERLLSL	9
					AMLGQAEEV	9
					AMPDSPAEV	9
					AMPPPPPQGV	10
					AMPQSGTGV	9
					AMQDRYMEV	9
					AMTKDNNLL	9
					AMVDYLQKA	9
					APPPPPPPP	9
					ARVLSLLEV	9
					ASSPEHPEL	9
					ATDPTIHTV	9
					AVALRPAEA	9
					AVDGKEMVTM	10
					AVHETLVAV	9
					AVIDVGINRV	10
					CVRPDQCECAPGW	13
					DDLALLKNL	9
					DINTDGAVNF	10
					DTNADKQL	8
					DTNADKQLS	9
					DTNADKQLSF	10
					EAQEVKTV	8
					EDLMKLII	8
					EGKLEQTV	8
					EGLKFVEGV	9
					ENAGEDPGLAR	11
					FAEGQGRAL	9
					FANGRSTGL	9
					FASHVSPEV	9
					FGEMGGKFM	9
					FLAEEGFYKF	10
					FLAPWATIA	9
					FLASESLIKQI	11
					FLDEPTNHL	9
					FLDSEVSEL	9
					FLFDTQHFI	9
					FLFPRSIDV	9
					FLGENISNFL	10
					FLLDGFPRTV	10
					FLLGPRLVLA	10
					FLLLPGPSAA	10
					FLMDFIHQV	9
					FLQEGDLISA	10
					FLSEHPNVTL	10
					FLSKQQASQV	10
					FLSKQQASQVLV	12
					FLWKEPATM	9
					FLYPFPLAL	9
					FNDPNAKEM	9
					FQDPVPLTV	9
					FQSMLHPVM	9
					FVDDYTVRV	9
					FVFPGELLL	9
					FVLPELPSV	9
					GADGVMRTM	9
					GALTPVQA	8
					GILGIQPPSV	10
					GLAARMSQV	9
					GLADKVYFL	9
					GLAEDSPKM	9
					GLATDVQTV	9
					GLDELFVQV	9
					GLDRLNVTV	9
					GLGPPGRSV	9
					GLIDRQVTV	9
					GLIEILKKV	9
					GLIEKNIEL	9
					GLMADPMKV	9
					GLMEDLLKL	9
					GLQEGTHEL	9
					GLVDQLVKA	9
					GMLDGLVNV	9
					GMMSTVTEV	9
					GMPDFLEKL	9
					GMWGGAMLGV	10
					GQLLLLSEV	9
					GVGPVPARA	9
					GVLPNIQAV	9
					GVYDGEEHSV	10
					GVYGDVHRV	9
					GVYGDVQRV	9
					GVYGGSVHEA	10
					HIIENIVAV	9
					HLDDLKGTFA	10
					HLIDFMSEI	9
					HLLGDPMANV	10
					HLLNESPML	9
					HLSNIPPSV	9
					HPPPPPPPP	9
					HYVTGPAEA	9
					IDAIRIPVL	9
					ILDAGGHNV	9
					ILDESDHITM	10
					ILDESHERV	9
					ILDPHVVLL	9
					ILDQKINEV	9
					ILENPPEEMKL	11
					ILLDNDHYAM	10
					ILTDITKGV	9
					IMLEALERV	9
					IQVTKVTQV	9
					ISEENFRVM	9
					ISIEGNKMPL	10
					ITQLNQGVTI	10
					IVDPFQILV	9
					IVPPGGHSV	9
					KAFTKPEEA	9
					KAHLGTAL	8
					KAPPAPLAA	9
					KAWENSPNV	9
					KDLEVYLQKL	10
					KIADFGWSV	9
					KIAPNTPQL	9
					KIAQFLESV	9
					KIDPTVTMM	9
					KIFEMGPVFTL	11
					KIGDFGLATV	10
					KIGEGTYGV	9
					KIIDEDGLLNL	11
					KIIDIQEKV	9
					KILPDLNTV	9
					KILPTLEAV	9
					KILQELPSV	9
					KILSELFTV	9
					KIQEILTQV	9
					KISDFGLATV	10
					KIVDFSYSV	9
					KIYEGQVEV	9
					KLDDTYIKA	9
					KLDEDVKMI	9
					KLDQDLNEV	9
					KLDSTPLKA	9
					KLDVGNAEV	9
					KLEEIIHQI	9
					KLFADAVQEL	10
					KLFNEFIQL	9
					KLFPGFEIETV	11
					KLGDIMGV	8
					KLGGVVSI	8
					KLGPEGELL	9
					KLGSVPVTV	9
					KLIANNTTV	9
					KLIDFGSGALL	11
					KLLDTMVDTFL	11
					KLLEGEESRISL	12
					KLLEPVLLL	9
					KLLEYIEEI	9
					KLMDLDVEQL	10
					KLMEEIREL	9
					KLMQQQQEV	9
					KLMQVVPQET	10
					KLNATNIEL	9
					KLNEMSYEL	9
					KLNPQQFEV	9
					KLQEFLQTL	9
					KLSEMSVTL	9
					KLSEYEMSI	9
					KLSSLIILM	9
					KLVEFDFLGA	10
					KLWEAESKL	9
					KLYQEVEIASV	11
					KMADIEYRL	9
					KMAEPFTKA	9
					KMANSVTDL	9
					KMDASLGNLFA	11
					KMDPIISRV	9
					KMFESFIESV	10
					KMIEDLQNEL	10
					KMISMDIEQV	10
					KMLDEILLQL	10
					KMLDFETFL	9
					KMLEIDPQKV	10
					KMVGDVTGA	9
					KMVGDVTGAQA	11
					KMVGTTSVV	9
					KMVTGVASA	9
					KMYEEFLSKV	10
					KQQASQVLV	9
					KQYGNEVFL	9
					KTIETSPSL	9
					KTLEGEFSV	9
					KVADALTNA	9
					KVAPAPAVV	9
					KVFDPVPVGV	10
					KVIDEIYRV	9
					KVLDFEHFL	9
					KVLERVNAV	9
					LAAGPGPSLG	10
					LAAGPSAAA	9
					LADDSVRSL	9
					LANGQTKVL	9
					LAQLLSEV	8
					LDTNADKQL	9
					LIKALVENI	9
					LLAAARLAAA	10
					LLAEKVEQL	9
					LLAPPSRPA	9
					LLDEPTNHL	9
					LLDHPRAEV	9
					LLDPSVFHV	9
					LLDPTNVFI	9
					LLDRFLATV	9
					LLDVTPLSL	9
					LLFEGEKITI	10
					LLGNVLVTV	9
					LLGPAGARA	9
					LLGPRLVLA	9
					LLHSGVENMQV	11
					LLIDDEYKV	9
					LLLDVPTAAV	10
					LLLDVPTAAVQA	12
					LLLNLAPAPLNA	12
					LLLNLDDSFS	10
					LLLPGPSAA	9
					LLLPLPVPA	9
					LLLPPPPCPA	10
					LLLPPQPALA	10
					LLNSEVHML	9
					LLPPQPALA	9
					LLSENHSTV	9
					LLYQEGAKMAV	11
					LMAEMGVHSV	10
					LMDPNSPERV	10
					LMTKEISSV	9
					LMVDHVTEV	9
					LNETGDEPFQYK	12
					LPMISFLIL	9
					LQYSVEVQV	9
					LSDNIISGGL	10
					LSLTEASLQKL	11
					LVMQGVSRA	9
					LWTALLFL	8
					MAPPAHKSI	9
					MDKAKASPL	9
					MEGISNVIQN	10
					MEMSLKVLE	9
					MITLLLPIL	9
					MLALLTQVA	9
					MLIGEIFEL	9
					MLLSVPLLLG	10
					MLTELEKAL	9
					MLVLCASTEL	10
					MMLDDLLQL	9
					MNVAEVDKV	9
					MTSEIHNTV	9
					MVDGTLLLL	9
					NADPQAVTM	9
					NIFPNPEATFV	11
					NIVEKLREV	9
					NLAEKLIGV	9
					NLAEKPKTV	9
					NLAENISRV	9
					NLAPAPLNA	9
					NLASFIEQV	9
					NLDPAVHEV	9
					NLIDLDDLYV	10
					NLLEQFILL	9
					NLLKLIAEV	9
					NLMEQPIKV	9
					NLYPFVKTV	9
					NMFGTKFETV	10
					NMVAKVDEV	9
					NMVDIIHSV	9
					NMYGKVVTV	9
					NTIDPSHPM	9
					PHPPPPPPP	9
					PSIPRLAK	8
					PSPPPPPPP	9
					QILPNGPILQ	10
					QLFSEIHNL	9
					QLYRGLGGQL	10
					QMFEGPLAL	9
					QSPSANVL	8
					QVENGGVLG	9
					RAVAPTMSL	9
					RFLLMMLSM	9
					RIADQFLGA	9
					RIIDVVYNA	9
					RLAPSMAMV	9
					RLAQAMETA	9
					RLDELGGVYL	10
					RLDSTGVNV	9
					RLFADILNDV	10
					RLFNDPVAMV	10
					RLIEEENML	9
					RLLENMTEV	9
					RLMDPPSNEA	10
					RLMDPPSNEAV	11
					RLMNDMTAV	9
					RLPDDDPTAV	10
					RLPPDFFGV	9
					RLQDELVTL	9
					RLQEELEKL	9
					RLWGEPVNL	9
					RLWPKIQGL	9
					RLYDPASGTISL	12
					RLYQGINQL	9
					RMAPALSGA	9
					RMAVLNEQV	9
					RMDGAVTSV	9
					RMWEDPMGA	9
					RTFDETVSTYV	11
					RVIGTLEEV	9
					RVLPPSALQSV	11
					RVMELFFTV	9
					RVPPPPPIA	9
					RVPPPPQSV	9
					RVSDINFTL	9
					SADDVIKM	8
					SADEPMTTF	9
					SADFETVRM	9
					SADKPLSNM	9
					SAIASTKVM	9
					SAIDRIFTL	9
					SAQGKPLAL	9
					SATSLPQTV	9
					SAYDNVNKV	9
					SFLVACVIL	9
					SIADKIQQI	9
					SIAEVVHQL	9
					SIAQIISSV	9
					SIIGRLLEV	9
					SIIQRLLEV	9
					SILEDPPSI	9
					SIMTFIKEL	9
					SIYNGDMEKI	10
					SLADDSVLERL	11
					SLADFMQEV	9
					SLAEFVQSL	9
					SLAEVLQQL	9
					SLAEYIDMI	9
					SLAKIYTEA	9
					SLAQMVSGL	9
					SLAQYLINA	9
					SLAQYLINV	9
					SLDALLSQV	9
					SLDKFLASV	9
					SLDKTSPEM	9
					SLDQPTQTV	9
					SLEELLHYV	9
					SLFAGGMLRV	10
					SLFDIISKI	9
					SLFERLVVL	9
					SLFPGQVVI	9
					SLHDMKTVV	9
					SLIEDLILL	9
					SLINVGLISV	10
					SLITRLLEV	9
					SLLDEFYKL	9
					SLLDIIEKV	9
					SLLDKIIGA	9
					SLLDLEQKL	9
					SLLDLPLSL	9
					SLLDRFLATV	10
					SLLEKSLGL	9
					SLLENLEKI	9
					SLLHLGALYGI	11
					SLLPFLKAV	9
					SLLPPDALVGL	11
					SLLQHLIGL	9
					SLLSHVEQL	9
					SLMDPDTKL	9
					SLMTKEISSV	10
					SLNGRIINV	9
					SLQDMASRV	9
					SLQEEIAFL	9
					SLQSTILGV	9
					SLSEKTVLL	9
					SLTGHISTV	9
					SLTGRLDEV	9
					SLYEMVSRV	9
					SMADIPLGFGV	11
					SMAEVDAAMAA	11
					SMAKAITGV	9
					SMFGKLIDL	9
					SMLEDVQRA	9
					SMLPTLREA	9
					SMMDPNHFL	9
					SMMDVDHQI	9
					SMTNFISGL	9
					SMVDVVMLL	9
					SMYGVDLHHA	10
					SMYGVDLHKA	10
					SPPPPPPPP	9
					SQDPTMIGV	9
					SQYPEIIFL	9
					SVDSKPPVI	9
					SVHPSIPASVHA	12
					SVIEQLFFV	9
					SVLGKVNEI	9
					SVLKSIQEV	9
					TIDPNTRTL	9
					TIIDKSKSV	9
					TLADIIARL	9
					TLADVLYHV	9
					TLAETLVNL	9
					TLAGVIDLA	9
					TLAKYLMEL	9
					TLAQRVKEV	9
					TLDEKIEKV	9
					TLIDLPGITKV	11
					TLISELVQA	9
					TLITDGMRSV	10
					TLLEDGTFKV	10
					TLLHAGGLARA	11
					TLNDIMTRV	9
					TLPPESTQV	9
					TLQEFLERI	9
					TLSDIMVSL	9
					TLTEEGVIKV	10
					TLVDEVFRI	9
					TLVDFPLHL	9
					TLVDNISTMAL	11
					TLVQSTLTLQL	11
					TLVYHVVGV	9
					TLYEAVREV	9
					TMAKESSIIGV	11
					TMIDFPQMV	9
					TQPAEKDTV	9
					TSDMPGTTL	9
					TVMDSKIVQV	10
					TVMGKIFAV	9
					TVSTVGISII	10
					VADPETRTV	9
					VAEENTRVL	9
					VAIDAGHESFL	11
					VASEKESVM	9
					VEDAAALKA	9
					VGDPGQRTL	9
					VGDPSVHLL	9
					VGSAVGHVM	9
					VIAEILRGV	9
					VIANEIEKV	9
					VLDDKLVFV	9
					VLESSNPKM	9
					VLFENTDSVHL	11
					VLFSSPPVILL	11
					VLGKVNEI	8
					VLIDDLTTL	9
					VLIDYQRNV	9
					VLIGEFLEKV	10
					VLIPKLPQL	9
					VLLAAGPSAA	10
					VLLPKVVNT	9
					VLLQVVPSSA	10
					VLMKDVQEI	9
					VLMTEDIKL	9
					VLSDIIQNL	9
					VLVNDFFLV	9
					VLWDRTFSL	9
					VMDPKQMNV	9
					VMDSKIVQV	9
					VMFKEPVEV	9
					VMKALFDL	8
					VMLEYVERA	9
					VMQETIRNL	9
					VMQGVSRAEM	10
					VNLGGSKSISIS	12
					VQGLAAAA	8
					VQIEEVRQV	9
					VRIASLEVE	9
					VSDDGTLHM	9
					VSQVGKEL	8
					VTVPPGPSL	9
					WLIEDGKVVTV	11
					YAEMGTRTF	9
					YAYDGKDYI	9
					YAYDGKDYIA	10
					YIKDGITRV	9
					YLADIFTKL	9
					YLANGQTKV	9
					YLDEYIARM	9
					YLDPAQQNL	9
					YLDPAQRGV	9
					YLDPNQRDL	9
					YLGQVAIL	8
					YLLPAIVHI	9
					YLVSEIFKA	9
					YLYPDITRL	9
					YMAELIERL	9
					YMDQWVPVI	9
					YMIAHITGL	9
					YQIPRTFTL	9
					YSDDIPHAL	9
					YSLDHISSL	9
					YSVSAQSSM	9
					TSGSDSDEELVTTER	15
					KAESTVAPEEDTDED	15
					SEVENVSVNVHNPTG	15
					TGGGAMAGASTSAGR	15
					TPRVTGGGAMAGAST	15
					TVAPEEDTDEDSDNE	15
					ARNLVPMVATVQGQN	15
					EEDTDEDSDNEIHNP	15
					TLGSDVEEDLTMTRN	15
					DSDEELVTTERICTPR	16
					VMAPRTLV	8
					MAPRTLVL	8
					MAVMAPRTLVL	11
					APRTLVL	7
					VMAPRTL	7
					VMAPRTLVLLL	11
					RVTAPRTLLL	10
					VMAPRTLI	8
					RVMAPRTLIL	10
					MAPRTLIL	8

## Sheet: Non-MS NetMHCpan
# NetMHCpan version 4.1b
	Pos	MHC	Peptide	Core	Of	Gp	Gl	Ip	Il	Icore	Identity	Score_EL	%Rank_EL	Score_BA	%Rank_BA	Aff(nM)		Bind Level		Pos	MHC	Peptide	Core	Of	Gp	Gl	Ip	Il	Icore	Identity	Score_EL	%Rank_EL	Score_BA	%Rank_BA	Aff(nM)		Bind Level
	1	HLA-E*01:01	VMAPRTLVL	VMAPRTLVL	0	0	0	0	0	VMAPRTLVL	PEPLIST	0.826261	0.003	0.603616	0.006	72.88	<=	SB		1	HLA-E*01:03	VMAPRTLVL	VMAPRTLVL	0	0	0	0	0	VMAPRTLVL	PEPLIST	0.826261	0.003	0.603616	0.006	72.88	<=	SB
	1	HLA-E*01:01	VMAPRTLIL	VMAPRTLIL	0	0	0	0	0	VMAPRTLIL	PEPLIST	0.788666	0.004	0.586388	0.006	87.81	<=	SB		1	HLA-E*01:03	VMAPRTLIL	VMAPRTLIL	0	0	0	0	0	VMAPRTLIL	PEPLIST	0.788666	0.004	0.586388	0.006	87.81	<=	SB
	1	HLA-E*01:01	VMAPRTLLL	VMAPRTLLL	0	0	0	0	0	VMAPRTLLL	PEPLIST	0.839255	0.003	0.633878	0.005	52.53	<=	SB		1	HLA-E*01:03	VMAPRTLLL	VMAPRTLLL	0	0	0	0	0	VMAPRTLLL	PEPLIST	0.839255	0.003	0.633878	0.005	52.53	<=	SB
	1	HLA-E*01:01	SQAPLPCVL	SQAPLPCVL	0	0	0	0	0	SQAPLPCVL	PEPLIST	0.226275	0.06	0.14275	0.158	10670.7	<=	SB		1	HLA-E*01:03	SQAPLPCVL	SQAPLPCVL	0	0	0	0	0	SQAPLPCVL	PEPLIST	0.226275	0.06	0.14275	0.158	10670.7	<=	SB
	1	HLA-E*01:01	SQAQLPCLV	SQAQLPCLV	0	0	0	0	0	SQAQLPCLV	PEPLIST	0.037753	1.124	0.084167	0.923	20112.8	<=	WB		1	HLA-E*01:03	SQAQLPCLV	SQAQLPCLV	0	0	0	0	0	SQAQLPCLV	PEPLIST	0.037753	1.124	0.084167	0.923	20112.8	<=	WB
	1	HLA-E*01:01	VMAPRTLFL	VMAPRTLFL	0	0	0	0	0	VMAPRTLFL	PEPLIST	0.779565	0.004	0.598937	0.006	76.66	<=	SB		1	HLA-E*01:03	VMAPRTLFL	VMAPRTLFL	0	0	0	0	0	VMAPRTLFL	PEPLIST	0.779565	0.004	0.598937	0.006	76.66	<=	SB
	1	HLA-E*01:01	YLLPRRGPRL	YLPRRGPRL	0	1	1	0	0	YLLPRRGPRL	PEPLIST	0.086663	0.374	0.148576	0.138	10018.8	<=	SB		1	HLA-E*01:03	YLLPRRGPRL	YLPRRGPRL	0	1	1	0	0	YLLPRRGPRL	PEPLIST	0.086663	0.374	0.148576	0.138	10018.8	<=	SB
	1	HLA-E*01:01	PEIVIYDYM	PEIVIYDYM	0	0	0	0	0	PEIVIYDYM	PEPLIST	0.000702	17.353	0.007405	47.832	46150.3				1	HLA-E*01:03	PEIVIYDYM	PEIVIYDYM	0	0	0	0	0	PEIVIYDYM	PEPLIST	0.000702	17.353	0.007405	47.832	46150.3
	1	HLA-E*01:01	AISPRTLNA	AISPRTLNA	0	0	0	0	0	AISPRTLNA	PEPLIST	0.00524	6.173	0.034232	7.446	34523.5				1	HLA-E*01:03	AISPRTLNA	AISPRTLNA	0	0	0	0	0	AISPRTLNA	PEPLIST	0.00524	6.173	0.034232	7.446	34523.5
	1	HLA-E*01:01	VMAPRALLL	VMAPRALLL	0	0	0	0	0	VMAPRALLL	PEPLIST	0.776949	0.004	0.591186	0.006	83.37	<=	SB		1	HLA-E*01:03	VMAPRALLL	VMAPRALLL	0	0	0	0	0	VMAPRALLL	PEPLIST	0.776949	0.004	0.591186	0.006	83.37	<=	SB
	1	HLA-E*01:01	QMRPVSRVL	QMRPVSRVL	0	0	0	0	0	QMRPVSRVL	PEPLIST	0.161664	0.126	0.132155	0.198	11966.8	<=	SB		1	HLA-E*01:03	QMRPVSRVL	QMRPVSRVL	0	0	0	0	0	QMRPVSRVL	PEPLIST	0.161664	0.126	0.132155	0.198	11966.8	<=	SB
	1	HLA-E*01:01	SQQPYLQLQ	SQQPYLQLQ	0	0	0	0	0	SQQPYLQLQ	PEPLIST	0.000385	21.717	0.013628	27.41	43145.2				1	HLA-E*01:03	SQQPYLQLQ	SQQPYLQLQ	0	0	0	0	0	SQQPYLQLQ	PEPLIST	0.000385	21.717	0.013628	27.41	43145.2
	1	HLA-E*01:01	RLPAKAPLL	RLPAKAPLL	0	0	0	0	0	RLPAKAPLL	PEPLIST	0.846339	0.003	0.634674	0.005	52.08	<=	SB		1	HLA-E*01:03	RLPAKAPLL	RLPAKAPLL	0	0	0	0	0	RLPAKAPLL	PEPLIST	0.846339	0.003	0.634674	0.005	52.08	<=	SB
	1	HLA-E*01:01	GMQFDRGYL	GMQFDRGYL	0	0	0	0	0	GMQFDRGYL	PEPLIST	0.003754	7.571	0.05923	2.339	26342.1				1	HLA-E*01:03	GMQFDRGYL	GMQFDRGYL	0	0	0	0	0	GMQFDRGYL	PEPLIST	0.003754	7.571	0.05923	2.339	26342.1
	1	HLA-E*01:01	AMLQDIATL	AMLQDIATL	0	0	0	0	0	AMLQDIATL	PEPLIST	0.111508	0.243	0.107049	0.432	15701.8	<=	SB		1	HLA-E*01:03	AMLQDIATL	AMLQDIATL	0	0	0	0	0	AMLQDIATL	PEPLIST	0.111508	0.243	0.107049	0.432	15701.8	<=	SB
	1	HLA-E*01:01	KMLRGVNVL	KMLRGVNVL	0	0	0	0	0	KMLRGVNVL	PEPLIST	0.110406	0.246	0.14093	0.165	10882.9	<=	SB		1	HLA-E*01:03	KMLRGVNVL	KMLRGVNVL	0	0	0	0	0	KMLRGVNVL	PEPLIST	0.110406	0.246	0.14093	0.165	10882.9	<=	SB
	1	HLA-E*01:01	VEGEALATL	VEGEALATL	0	0	0	0	0	VEGEALATL	PEPLIST	0.013208	3.141	0.046822	3.971	30126.9				1	HLA-E*01:03	VEGEALATL	VEGEALATL	0	0	0	0	0	VEGEALATL	PEPLIST	0.013208	3.141	0.046822	3.971	30126.9
	1	HLA-E*01:01	AAVEELKAL	AAVEELKAL	0	0	0	0	0	AAVEELKAL	PEPLIST	0.024259	1.771	0.040003	5.498	32433.7	<=	WB		1	HLA-E*01:03	AAVEELKAL	AAVEELKAL	0	0	0	0	0	AAVEELKAL	PEPLIST	0.024259	1.771	0.040003	5.498	32433.7	<=	WB
	1	HLA-E*01:01	AVAKAGKPL	AVAKAGKPL	0	0	0	0	0	AVAKAGKPL	PEPLIST	0.016679	2.558	0.061723	2.114	25641				1	HLA-E*01:03	AVAKAGKPL	AVAKAGKPL	0	0	0	0	0	AVAKAGKPL	PEPLIST	0.016679	2.558	0.061723	2.114	25641
	1	HLA-E*01:01	KLQERVAKL	KLQERVAKL	0	0	0	0	0	KLQERVAKL	PEPLIST	0.281025	0.035	0.153897	0.122	9458.29	<=	SB		1	HLA-E*01:03	KLQERVAKL	KLQERVAKL	0	0	0	0	0	KLQERVAKL	PEPLIST	0.281025	0.035	0.153897	0.122	9458.29	<=	SB
	1	HLA-E*01:01	LLPRRGPRL	LLPRRGPRL	0	0	0	0	0	LLPRRGPRL	PEPLIST	0.486718	0.01	0.383956	0.009	784.82	<=	SB		1	HLA-E*01:03	LLPRRGPRL	LLPRRGPRL	0	0	0	0	0	LLPRRGPRL	PEPLIST	0.486718	0.01	0.383956	0.009	784.82	<=	SB
	1	HLA-E*01:01	SMADRAENL	SMADRAENL	0	0	0	0	0	SMADRAENL	PEPLIST	0.142409	0.161	0.146633	0.144	10231.6	<=	SB		1	HLA-E*01:03	SMADRAENL	SMADRAENL	0	0	0	0	0	SMADRAENL	PEPLIST	0.142409	0.161	0.146633	0.144	10231.6	<=	SB
	1	HLA-E*01:01	SMAGRAGQL	SMAGRAGQL	0	0	0	0	0	SMAGRAGQL	PEPLIST	0.05975	0.636	0.127673	0.228	12561.4	<=	WB		1	HLA-E*01:03	SMAGRAGQL	SMAGRAGQL	0	0	0	0	0	SMAGRAGQL	PEPLIST	0.05975	0.636	0.127673	0.228	12561.4	<=	WB
	1	HLA-E*01:01	IMANRAQVL	IMANRAQVL	0	0	0	0	0	IMANRAQVL	PEPLIST	0.303524	0.028	0.302039	0.01	1904.13	<=	SB		1	HLA-E*01:03	IMANRAQVL	IMANRAQVL	0	0	0	0	0	IMANRAQVL	PEPLIST	0.303524	0.028	0.302039	0.01	1904.13	<=	SB
	1	HLA-E*01:01	KMNAKAATL	KMNAKAATL	0	0	0	0	0	KMNAKAATL	PEPLIST	0.231893	0.058	0.209791	0.039	5166.17	<=	SB		1	HLA-E*01:03	KMNAKAATL	KMNAKAATL	0	0	0	0	0	KMNAKAATL	PEPLIST	0.231893	0.058	0.209791	0.039	5166.17	<=	SB
	1	HLA-E*01:01	QMKFYAVAL	QMKFYAVAL	0	0	0	0	0	QMKFYAVAL	PEPLIST	0.034005	1.271	0.101061	0.524	16752.8	<=	WB		1	HLA-E*01:03	QMKFYAVAL	QMKFYAVAL	0	0	0	0	0	QMKFYAVAL	PEPLIST	0.034005	1.271	0.101061	0.524	16752.8	<=	WB
	1	HLA-E*01:01	PMKRTALAL	PMKRTALAL	0	0	0	0	0	PMKRTALAL	PEPLIST	0.013444	3.091	0.058394	2.414	26581.4				1	HLA-E*01:03	PMKRTALAL	PMKRTALAL	0	0	0	0	0	PMKRTALAL	PEPLIST	0.013444	3.091	0.058394	2.414	26581.4
	1	HLA-E*01:01	GMNVTAPAL	GMNVTAPAL	0	0	0	0	0	GMNVTAPAL	PEPLIST	0.034102	1.267	0.099681	0.547	17004.8	<=	WB		1	HLA-E*01:03	GMNVTAPAL	GMNVTAPAL	0	0	0	0	0	GMNVTAPAL	PEPLIST	0.034102	1.267	0.099681	0.547	17004.8	<=	WB
	1	HLA-E*01:01	VMADRTRHL	VMADRTRHL	0	0	0	0	0	VMADRTRHL	PEPLIST	0.339025	0.02	0.196428	0.052	5969.81	<=	SB		1	HLA-E*01:03	VMADRTRHL	VMADRTRHL	0	0	0	0	0	VMADRTRHL	PEPLIST	0.339025	0.02	0.196428	0.052	5969.81	<=	SB
	1	HLA-E*01:01	WMCDRAVDL	WMCDRAVDL	0	0	0	0	0	WMCDRAVDL	PEPLIST	0.005713	5.825	0.058785	2.379	26469.2				1	HLA-E*01:03	WMCDRAVDL	WMCDRAVDL	0	0	0	0	0	WMCDRAVDL	PEPLIST	0.005713	5.825	0.058785	2.379	26469.2
	1	HLA-E*01:01	LMVVRALFL	LMVVRALFL	0	0	0	0	0	LMVVRALFL	PEPLIST	0.052695	0.748	0.150527	0.132	9809.53	<=	WB		1	HLA-E*01:03	LMVVRALFL	LMVVRALFL	0	0	0	0	0	LMVVRALFL	PEPLIST	0.052695	0.748	0.150527	0.132	9809.53	<=	WB
	1	HLA-E*01:01	EMVLRADQL	EMVLRADQL	0	0	0	0	0	EMVLRADQL	PEPLIST	0.007738	4.758	0.040626	5.328	32215.9				1	HLA-E*01:03	EMVLRADQL	EMVLRADQL	0	0	0	0	0	EMVLRADQL	PEPLIST	0.007738	4.758	0.040626	5.328	32215.9
	1	HLA-E*01:01	DMLGRAGGL	DMLGRAGGL	0	0	0	0	0	DMLGRAGGL	PEPLIST	0.001466	12.59	0.029916	9.465	36173.9				1	HLA-E*01:03	DMLGRAGGL	DMLGRAGGL	0	0	0	0	0	DMLGRAGGL	PEPLIST	0.001466	12.59	0.029916	9.465	36173.9
	1	HLA-E*01:01	MMKYLAFGL	MMKYLAFGL	0	0	0	0	0	MMKYLAFGL	PEPLIST	0.017211	2.481	0.135556	0.186	11534.4				1	HLA-E*01:03	MMKYLAFGL	MMKYLAFGL	0	0	0	0	0	MMKYLAFGL	PEPLIST	0.017211	2.481	0.135556	0.186	11534.4
	1	HLA-E*01:01	RMAATAQVL	RMAATAQVL	0	0	0	0	0	RMAATAQVL	PEPLIST	0.259209	0.047	0.297153	0.01	2007.51	<=	SB		1	HLA-E*01:03	RMAATAQVL	RMAATAQVL	0	0	0	0	0	RMAATAQVL	PEPLIST	0.259209	0.047	0.297153	0.01	2007.51	<=	SB
	1	HLA-E*01:01	FLAADALVL	FLAADALVL	0	0	0	0	0	FLAADALVL	PEPLIST	0.030111	1.424	0.0898	0.77	18923.5	<=	WB		1	HLA-E*01:03	FLAADALVL	FLAADALVL	0	0	0	0	0	FLAADALVL	PEPLIST	0.030111	1.424	0.0898	0.77	18923.5	<=	WB
	1	HLA-E*01:01	VEAFRTRPL	VEAFRTRPL	0	0	0	0	0	VEAFRTRPL	PEPLIST	0.013182	3.146	0.059372	2.326	26301.6				1	HLA-E*01:03	VEAFRTRPL	VEAFRTRPL	0	0	0	0	0	VEAFRTRPL	PEPLIST	0.013182	3.146	0.059372	2.326	26301.6
	1	HLA-E*01:01	LMGAEADAL	LMGAEADAL	0	0	0	0	0	LMGAEADAL	PEPLIST	0.002067	10.574	0.048042	3.771	29731.9				1	HLA-E*01:03	LMGAEADAL	LMGAEADAL	0	0	0	0	0	LMGAEADAL	PEPLIST	0.002067	10.574	0.048042	3.771	29731.9
	1	HLA-E*01:01	GLDSRAYRL	GLDSRAYRL	0	0	0	0	0	GLDSRAYRL	PEPLIST	0.057542	0.667	0.068602	1.614	23801.9	<=	WB		1	HLA-E*01:03	GLDSRAYRL	GLDSRAYRL	0	0	0	0	0	GLDSRAYRL	PEPLIST	0.057542	0.667	0.068602	1.614	23801.9	<=	WB
	1	HLA-E*01:01	GLDARAYRL	GLDARAYRL	0	0	0	0	0	GLDARAYRL	PEPLIST	0.046904	0.866	0.072405	1.389	22842.4	<=	WB		1	HLA-E*01:03	GLDARAYRL	GLDARAYRL	0	0	0	0	0	GLDARAYRL	PEPLIST	0.046904	0.866	0.072405	1.389	22842.4	<=	WB
	1	HLA-E*01:01	PMAPLAPLL	PMAPLAPLL	0	0	0	0	0	PMAPLAPLL	PEPLIST	0.05694	0.675	0.138412	0.175	11183.5	<=	WB		1	HLA-E*01:03	PMAPLAPLL	PMAPLAPLL	0	0	0	0	0	PMAPLAPLL	PEPLIST	0.05694	0.675	0.138412	0.175	11183.5	<=	WB
	1	HLA-E*01:01	EMKTDAATL	EMKTDAATL	0	0	0	0	0	EMKTDAATL	PEPLIST	0.014076	2.969	0.042831	4.78	31456.4				1	HLA-E*01:03	EMKTDAATL	EMKTDAATL	0	0	0	0	0	EMKTDAATL	PEPLIST	0.014076	2.969	0.042831	4.78	31456.4
	1	HLA-E*01:01	PMQQLTQPL	PMQQLTQPL	0	0	0	0	0	PMQQLTQPL	PEPLIST	0.002052	10.614	0.042854	4.775	31448.5				1	HLA-E*01:03	PMQQLTQPL	PMQQLTQPL	0	0	0	0	0	PMQQLTQPL	PEPLIST	0.002052	10.614	0.042854	4.775	31448.5
	1	HLA-E*01:01	PMADIAAAL	PMADIAAAL	0	0	0	0	0	PMADIAAAL	PEPLIST	0.004357	6.911	0.053144	3	28135.1				1	HLA-E*01:03	PMADIAAAL	PMADIAAAL	0	0	0	0	0	PMADIAAAL	PEPLIST	0.004357	6.911	0.053144	3	28135.1
	1	HLA-E*01:01	ALPPRAFEL	ALPPRAFEL	0	0	0	0	0	ALPPRAFEL	PEPLIST	0.78443	0.004	0.459572	0.008	346.3	<=	SB		1	HLA-E*01:03	ALPPRAFEL	ALPPRAFEL	0	0	0	0	0	ALPPRAFEL	PEPLIST	0.78443	0.004	0.459572	0.008	346.3	<=	SB
	1	HLA-E*01:01	AMVNTTTRL	AMVNTTTRL	0	0	0	0	0	AMVNTTTRL	PEPLIST	0.100886	0.283	0.103567	0.484	16304.7	<=	SB		1	HLA-E*01:03	AMVNTTTRL	AMVNTTTRL	0	0	0	0	0	AMVNTTTRL	PEPLIST	0.100886	0.283	0.103567	0.484	16304.7	<=	SB
	1	HLA-E*01:01	LMGALAVVL	LMGALAVVL	0	0	0	0	0	LMGALAVVL	PEPLIST	0.020297	2.134	0.095715	0.619	17750.4				1	HLA-E*01:03	LMGALAVVL	LMGALAVVL	0	0	0	0	0	LMGALAVVL	PEPLIST	0.020297	2.134	0.095715	0.619	17750.4
	1	HLA-E*01:01	VSNLRTGKL	VSNLRTGKL	0	0	0	0	0	VSNLRTGKL	PEPLIST	0.040292	1.042	0.0829	0.965	20390.4	<=	WB		1	HLA-E*01:03	VSNLRTGKL	VSNLRTGKL	0	0	0	0	0	VSNLRTGKL	PEPLIST	0.040292	1.042	0.0829	0.965	20390.4	<=	WB
	1	HLA-E*01:01	TSADRAVVL	TSADRAVVL	0	0	0	0	0	TSADRAVVL	PEPLIST	0.12063	0.212	0.117056	0.315	14090.5	<=	SB		1	HLA-E*01:03	TSADRAVVL	TSADRAVVL	0	0	0	0	0	TSADRAVVL	PEPLIST	0.12063	0.212	0.117056	0.315	14090.5	<=	SB
	1	HLA-E*01:01	LMHYRGELL	LMHYRGELL	0	0	0	0	0	LMHYRGELL	PEPLIST	0.076374	0.465	0.191934	0.054	6267.26	<=	SB		1	HLA-E*01:03	LMHYRGELL	LMHYRGELL	0	0	0	0	0	LMHYRGELL	PEPLIST	0.076374	0.465	0.191934	0.054	6267.26	<=	SB
	1	HLA-E*01:01	NMMARGMDL	NMMARGMDL	0	0	0	0	0	NMMARGMDL	PEPLIST	0.014493	2.903	0.09382	0.663	18118.1				1	HLA-E*01:03	NMMARGMDL	NMMARGMDL	0	0	0	0	0	NMMARGMDL	PEPLIST	0.014493	2.903	0.09382	0.663	18118.1
	1	HLA-E*01:01	LPAERAHEL	LPAERAHEL	0	0	0	0	0	LPAERAHEL	PEPLIST	0.039867	1.055	0.057493	2.495	26841.8	<=	WB		1	HLA-E*01:03	LPAERAHEL	LPAERAHEL	0	0	0	0	0	LPAERAHEL	PEPLIST	0.039867	1.055	0.057493	2.495	26841.8	<=	WB
	1	HLA-E*01:01	VMMSEIAGL	VMMSEIAGL	0	0	0	0	0	VMMSEIAGL	PEPLIST	0.071476	0.512	0.142786	0.158	10666.5	<=	WB		1	HLA-E*01:03	VMMSEIAGL	VMMSEIAGL	0	0	0	0	0	VMMSEIAGL	PEPLIST	0.071476	0.512	0.142786	0.158	10666.5	<=	WB
	1	HLA-E*01:01	TMITFRLRL	TMITFRLRL	0	0	0	0	0	TMITFRLRL	PEPLIST	0.134926	0.175	0.153909	0.122	9457.07	<=	SB		1	HLA-E*01:03	TMITFRLRL	TMITFRLRL	0	0	0	0	0	TMITFRLRL	PEPLIST	0.134926	0.175	0.153909	0.122	9457.07	<=	SB
	1	HLA-E*01:01	VMTTVLATL	VMTTVLATL	0	0	0	0	0	VMTTVLATL	PEPLIST	0.10883	0.252	0.156423	0.116	9203.29	<=	SB		1	HLA-E*01:03	VMTTVLATL	VMTTVLATL	0	0	0	0	0	VMTTVLATL	PEPLIST	0.10883	0.252	0.156423	0.116	9203.29	<=	SB
	1	HLA-E*01:01	GMGMVGTAL	GMGMVGTAL	0	0	0	0	0	GMGMVGTAL	PEPLIST	0.003906	7.395	0.045185	4.288	30665.3				1	HLA-E*01:03	GMGMVGTAL	GMGMVGTAL	0	0	0	0	0	GMGMVGTAL	PEPLIST	0.003906	7.395	0.045185	4.288	30665.3
	1	HLA-E*01:01	AMAGSIDLL	AMAGSIDLL	0	0	0	0	0	AMAGSIDLL	PEPLIST	0.056977	0.675	0.13048	0.209	12185.6	<=	WB		1	HLA-E*01:03	AMAGSIDLL	AMAGSIDLL	0	0	0	0	0	AMAGSIDLL	PEPLIST	0.056977	0.675	0.13048	0.209	12185.6	<=	WB
	1	HLA-E*01:01	EMLTSRGLL	EMLTSRGLL	0	0	0	0	0	EMLTSRGLL	PEPLIST	0.007699	4.774	0.050773	3.344	28866.2				1	HLA-E*01:03	EMLTSRGLL	EMLTSRGLL	0	0	0	0	0	EMLTSRGLL	PEPLIST	0.007699	4.774	0.050773	3.344	28866.2
	1	HLA-E*01:01	QMRACARRL	QMRACARRL	0	0	0	0	0	QMRACARRL	PEPLIST	0.031957	1.35	0.130913	0.206	12128.7	<=	WB		1	HLA-E*01:03	QMRACARRL	QMRACARRL	0	0	0	0	0	QMRACARRL	PEPLIST	0.031957	1.35	0.130913	0.206	12128.7	<=	WB
	1	HLA-E*01:01	AMEYFRQVL	AMEYFRQVL	0	0	0	0	0	AMEYFRQVL	PEPLIST	0.053392	0.735	0.12043	0.284	13585.4	<=	WB		1	HLA-E*01:03	AMEYFRQVL	AMEYFRQVL	0	0	0	0	0	AMEYFRQVL	PEPLIST	0.053392	0.735	0.12043	0.284	13585.4	<=	WB
	1	HLA-E*01:01	SMFAAVQAL	SMFAAVQAL	0	0	0	0	0	SMFAAVQAL	PEPLIST	0.154165	0.139	0.175382	0.076	7496.44	<=	SB		1	HLA-E*01:03	SMFAAVQAL	SMFAAVQAL	0	0	0	0	0	SMFAAVQAL	PEPLIST	0.154165	0.139	0.175382	0.076	7496.44	<=	SB
	1	HLA-E*01:01	HMAQTLGSL	HMAQTLGSL	0	0	0	0	0	HMAQTLGSL	PEPLIST	0.030528	1.405	0.086227	0.865	19669.4	<=	WB		1	HLA-E*01:03	HMAQTLGSL	HMAQTLGSL	0	0	0	0	0	HMAQTLGSL	PEPLIST	0.030528	1.405	0.086227	0.865	19669.4	<=	WB
	1	HLA-E*01:01	EMGRAPLDL	EMGRAPLDL	0	0	0	0	0	EMGRAPLDL	PEPLIST	0.003587	7.768	0.03971	5.582	32536.7				1	HLA-E*01:03	EMGRAPLDL	EMGRAPLDL	0	0	0	0	0	EMGRAPLDL	PEPLIST	0.003587	7.768	0.03971	5.582	32536.7
	1	HLA-E*01:01	VMAPLGPIL	VMAPLGPIL	0	0	0	0	0	VMAPLGPIL	PEPLIST	0.452056	0.012	0.369763	0.009	915.09	<=	SB		1	HLA-E*01:03	VMAPLGPIL	VMAPLGPIL	0	0	0	0	0	VMAPLGPIL	PEPLIST	0.452056	0.012	0.369763	0.009	915.09	<=	SB
	1	HLA-E*01:01	QLAPGLQLI	QLAPGLQLI	0	0	0	0	0	QLAPGLQLI	PEPLIST	0.050576	0.79	0.084424	0.914	20056.9	<=	WB		1	HLA-E*01:03	QLAPGLQLI	QLAPGLQLI	0	0	0	0	0	QLAPGLQLI	PEPLIST	0.050576	0.79	0.084424	0.914	20056.9	<=	WB
	1	HLA-E*01:01	RLAPGGTTI	RLAPGGTTI	0	0	0	0	0	RLAPGGTTI	PEPLIST	0.147764	0.15	0.137351	0.179	11312.6	<=	SB		1	HLA-E*01:03	RLAPGGTTI	RLAPGGTTI	0	0	0	0	0	RLAPGGTTI	PEPLIST	0.147764	0.15	0.137351	0.179	11312.6	<=	SB
	1	HLA-E*01:01	RLANLLPLI	RLANLLPLI	0	0	0	0	0	RLANLLPLI	PEPLIST	0.060667	0.624	0.133586	0.193	11782.9	<=	WB		1	HLA-E*01:03	RLANLLPLI	RLANLLPLI	0	0	0	0	0	RLANLLPLI	PEPLIST	0.060667	0.624	0.133586	0.193	11782.9	<=	WB
	1	HLA-E*01:01	ILPSDAPVL	ILPSDAPVL	0	0	0	0	0	ILPSDAPVL	PEPLIST	0.552505	0.009	0.426083	0.008	497.53	<=	SB		1	HLA-E*01:03	ILPSDAPVL	ILPSDAPVL	0	0	0	0	0	ILPSDAPVL	PEPLIST	0.552505	0.009	0.426083	0.008	497.53	<=	SB
	1	HLA-E*01:01	VLLPGLPYL	VLLPGLPYL	0	0	0	0	0	VLLPGLPYL	PEPLIST	0.281024	0.035	0.200252	0.049	5727.85	<=	SB		1	HLA-E*01:03	VLLPGLPYL	VLLPGLPYL	0	0	0	0	0	VLLPGLPYL	PEPLIST	0.281024	0.035	0.200252	0.049	5727.85	<=	SB
	1	HLA-E*01:01	REPRRGPRL	REPRRGPRL	0	0	0	0	0	REPRRGPRL	PEPLIST	0.08239	0.408	0.094003	0.659	18082.3	<=	SB		1	HLA-E*01:03	REPRRGPRL	REPRRGPRL	0	0	0	0	0	REPRRGPRL	PEPLIST	0.08239	0.408	0.094003	0.659	18082.3	<=	SB
	1	HLA-E*01:01	RLRPELAGL	RLRPELAGL	0	0	0	0	0	RLRPELAGL	PEPLIST	0.070708	0.519	0.105382	0.457	15987.6	<=	WB		1	HLA-E*01:03	RLRPELAGL	RLRPELAGL	0	0	0	0	0	RLRPELAGL	PEPLIST	0.070708	0.519	0.105382	0.457	15987.6	<=	WB
	1	HLA-E*01:01	RELPGRVLL	RELPGRVLL	0	0	0	0	0	RELPGRVLL	PEPLIST	0.056246	0.685	0.060877	2.19	25876.8	<=	WB		1	HLA-E*01:03	RELPGRVLL	RELPGRVLL	0	0	0	0	0	RELPGRVLL	PEPLIST	0.056246	0.685	0.060877	2.19	25876.8	<=	WB
	1	HLA-E*01:01	FLLPRGLAI	FLLPRGLAI	0	0	0	0	0	FLLPRGLAI	PEPLIST	0.080188	0.429	0.112203	0.368	14850.2	<=	SB		1	HLA-E*01:03	FLLPRGLAI	FLLPRGLAI	0	0	0	0	0	FLLPRGLAI	PEPLIST	0.080188	0.429	0.112203	0.368	14850.2	<=	SB
	1	HLA-E*01:01	VMATRRNVL	VMATRRNVL	0	0	0	0	0	VMATRRNVL	PEPLIST	0.130142	0.186	0.189559	0.056	6430.4	<=	SB		1	HLA-E*01:03	VMATRRNVL	VMATRRNVL	0	0	0	0	0	VMATRRNVL	PEPLIST	0.130142	0.186	0.189559	0.056	6430.4	<=	SB
	1	HLA-E*01:01	RLGRLLNRI	RLGRLLNRI	0	0	0	0	0	RLGRLLNRI	PEPLIST	0.012857	3.214	0.060422	2.231	26004.5				1	HLA-E*01:03	RLGRLLNRI	RLGRLLNRI	0	0	0	0	0	RLGRLLNRI	PEPLIST	0.012857	3.214	0.060422	2.231	26004.5
	1	HLA-E*01:01	IEPRGAQAL	IEPRGAQAL	0	0	0	0	0	IEPRGAQAL	PEPLIST	0.041575	1.004	0.063783	1.948	25075.8	<=	WB		1	HLA-E*01:03	IEPRGAQAL	IEPRGAQAL	0	0	0	0	0	IEPRGAQAL	PEPLIST	0.041575	1.004	0.063783	1.948	25075.8	<=	WB
	1	HLA-E*01:01	DLPSRLGKI	DLPSRLGKI	0	0	0	0	0	DLPSRLGKI	PEPLIST	0.008205	4.559	0.049725	3.496	29195.3				1	HLA-E*01:03	DLPSRLGKI	DLPSRLGKI	0	0	0	0	0	DLPSRLGKI	PEPLIST	0.008205	4.559	0.049725	3.496	29195.3
	1	HLA-E*01:01	RPANLAFFL	RPANLAFFL	0	0	0	0	0	RPANLAFFL	PEPLIST	0.023212	1.86	0.084544	0.91	20030.9	<=	WB		1	HLA-E*01:03	RPANLAFFL	RPANLAFFL	0	0	0	0	0	RPANLAFFL	PEPLIST	0.023212	1.86	0.084544	0.91	20030.9	<=	WB
	1	HLA-E*01:01	FMTRLGPLL	FMTRLGPLL	0	0	0	0	0	FMTRLGPLL	PEPLIST	0.089718	0.351	0.154679	0.12	9378.6	<=	SB		1	HLA-E*01:03	FMTRLGPLL	FMTRLGPLL	0	0	0	0	0	FMTRLGPLL	PEPLIST	0.089718	0.351	0.154679	0.12	9378.6	<=	SB
	1	HLA-E*01:01	RLASCRDAL	RLASCRDAL	0	0	0	0	0	RLASCRDAL	PEPLIST	0.010048	3.914	0.087285	0.838	19445.6				1	HLA-E*01:03	RLASCRDAL	RLASCRDAL	0	0	0	0	0	RLASCRDAL	PEPLIST	0.010048	3.914	0.087285	0.838	19445.6
	1	HLA-E*01:01	RMPPLGHEL	RMPPLGHEL	0	0	0	0	0	RMPPLGHEL	PEPLIST	0.786438	0.004	0.405351	0.008	622.64	<=	SB		1	HLA-E*01:03	RMPPLGHEL	RMPPLGHEL	0	0	0	0	0	RMPPLGHEL	PEPLIST	0.786438	0.004	0.405351	0.008	622.64	<=	SB
	1	HLA-E*01:01	VMAPDAVRI	VMAPDAVRI	0	0	0	0	0	VMAPDAVRI	PEPLIST	0.122923	0.204	0.153665	0.123	9482.06	<=	SB		1	HLA-E*01:03	VMAPDAVRI	VMAPDAVRI	0	0	0	0	0	VMAPDAVRI	PEPLIST	0.122923	0.204	0.153665	0.123	9482.06	<=	SB
	1	HLA-E*01:01	RSCPRLTIL	RSCPRLTIL	0	0	0	0	0	RSCPRLTIL	PEPLIST	0.073972	0.488	0.107381	0.427	15645.5	<=	SB		1	HLA-E*01:03	RSCPRLTIL	RSCPRLTIL	0	0	0	0	0	RSCPRLTIL	PEPLIST	0.073972	0.488	0.107381	0.427	15645.5	<=	SB
	1	HLA-E*01:01	RLARRARNI	RLARRARNI	0	0	0	0	0	RLARRARNI	PEPLIST	0.043936	0.937	0.114911	0.338	14421.4	<=	WB		1	HLA-E*01:03	RLARRARNI	RLARRARNI	0	0	0	0	0	RLARRARNI	PEPLIST	0.043936	0.937	0.114911	0.338	14421.4	<=	WB
	1	HLA-E*01:01	RLGLCALAL	RLGLCALAL	0	0	0	0	0	RLGLCALAL	PEPLIST	0.004336	6.929	0.066193	1.776	24430.4				1	HLA-E*01:03	RLGLCALAL	RLGLCALAL	0	0	0	0	0	RLGLCALAL	PEPLIST	0.004336	6.929	0.066193	1.776	24430.4
	1	HLA-E*01:01	VLPACLGIL	VLPACLGIL	0	0	0	0	0	VLPACLGIL	PEPLIST	0.022991	1.878	0.158621	0.111	8987	<=	WB		1	HLA-E*01:03	VLPACLGIL	VLPACLGIL	0	0	0	0	0	VLPACLGIL	PEPLIST	0.022991	1.878	0.158621	0.111	8987	<=	WB
	1	HLA-E*01:01	VLRPGGHFL	VLRPGGHFL	0	0	0	0	0	VLRPGGHFL	PEPLIST	0.266427	0.041	0.223885	0.032	4435.48	<=	SB		1	HLA-E*01:03	VLRPGGHFL	VLRPGGHFL	0	0	0	0	0	VLRPGGHFL	PEPLIST	0.266427	0.041	0.223885	0.032	4435.48	<=	SB
	1	HLA-E*01:01	WLPPLLTNL	WLPPLLTNL	0	0	0	0	0	WLPPLLTNL	PEPLIST	0.168192	0.116	0.125443	0.244	12868.2	<=	SB		1	HLA-E*01:03	WLPPLLTNL	WLPPLLTNL	0	0	0	0	0	WLPPLLTNL	PEPLIST	0.168192	0.116	0.125443	0.244	12868.2	<=	SB

## Sheet: MS-based NetMHCpan
# NetMHCpan version 4.1b
	Pos	MHC	Peptide	Core	Of	Gp	Gl	Ip	Il	Icore	Identity	Score_EL %	Rank_EL	Score_BA %	Rank_BA	Aff(nM)		Bind Level		Pos	MHC	Peptide	Core	Of	Gp	Gl	Ip	Il	Icore	Identity	Score_EL %	Rank_EL	Score_BA %	Rank_BA	Aff(nM)		Bind Level
	1	HLA-E*01:01	VMAPRTLVL	VMAPRTLVL	0	0	0	0	0	VMAPRTLVL	PEPLIST	0.826261	0.003	0.603616	0.006	72.88	<=	SB		1	HLA-E*01:03	VMAPRTLVL	VMAPRTLVL	0	0	0	0	0	VMAPRTLVL	PEPLIST	0.826261	0.003	0.603616	0.006	72.88	<=	SB
	1	HLA-E*01:01	VMAPRTLLL	VMAPRTLLL	0	0	0	0	0	VMAPRTLLL	PEPLIST	0.839255	0.003	0.633878	0.005	52.53	<=	SB		1	HLA-E*01:03	VMAPRTLLL	VMAPRTLLL	0	0	0	0	0	VMAPRTLLL	PEPLIST	0.839255	0.003	0.633878	0.005	52.53	<=	SB
	1	HLA-E*01:01	VMAPRTLFL	VMAPRTLFL	0	0	0	0	0	VMAPRTLFL	PEPLIST	0.779565	0.004	0.598937	0.006	76.66	<=	SB		1	HLA-E*01:03	VMAPRTLFL	VMAPRTLFL	0	0	0	0	0	VMAPRTLFL	PEPLIST	0.779565	0.004	0.598937	0.006	76.66	<=	SB
	1	HLA-E*01:01	VTAPRTLLL	VTAPRTLLL	0	0	0	0	0	VTAPRTLLL	PEPLIST	0.547708	0.009	0.359028	0.009	1027.8	<=	SB		1	HLA-E*01:03	VTAPRTLLL	VTAPRTLLL	0	0	0	0	0	VTAPRTLLL	PEPLIST	0.547708	0.009	0.359028	0.009	1027.8	<=	SB
	1	HLA-E*01:01	VMAPRTLIL	VMAPRTLIL	0	0	0	0	0	VMAPRTLIL	PEPLIST	0.788666	0.004	0.586388	0.006	87.81	<=	SB		1	HLA-E*01:03	VMAPRTLIL	VMAPRTLIL	0	0	0	0	0	VMAPRTLIL	PEPLIST	0.788666	0.004	0.586388	0.006	87.81	<=	SB
	1	HLA-E*01:01	VTAPRTVLL	VTAPRTVLL	0	0	0	0	0	VTAPRTVLL	PEPLIST	0.531195	0.009	0.327841	0.01	1440.31	<=	SB		1	HLA-E*01:03	VTAPRTVLL	VTAPRTVLL	0	0	0	0	0	VTAPRTVLL	PEPLIST	0.531195	0.009	0.327841	0.01	1440.31	<=	SB
	1	HLA-E*01:01	VMAPRTVLL	VMAPRTVLL	0	0	0	0	0	VMAPRTVLL	PEPLIST	0.823266	0.003	0.58555	0.006	88.61	<=	SB		1	HLA-E*01:03	VMAPRTVLL	VMAPRTVLL	0	0	0	0	0	VMAPRTVLL	PEPLIST	0.823266	0.003	0.58555	0.006	88.61	<=	SB
	1	HLA-E*01:01	PELAKSAPAPK	PEKSAPAPK	0	2	2	0	0	PELAKSAPAPK	PEPLIST	3e-06	80	0.002956	85.634	48426.2				1	HLA-E*01:03	PELAKSAPAPK	PEKSAPAPK	0	2	2	0	0	PELAKSAPAPK	PEPLIST	3e-06	80	0.002956	85.634	48426.2
	1	HLA-E*01:01	VGGTSDVEVNEK	VSDVEVNEK	0	1	3	0	0	VGGTSDVEVNEK	PEPLIST	1e-06	90	0.003179	83.224	48309.4				1	HLA-E*01:03	VGGTSDVEVNEK	VSDVEVNEK	0	1	3	0	0	VGGTSDVEVNEK	PEPLIST	1e-06	90	0.003179	83.224	48309.4
	1	HLA-E*01:01	ALALVRMLI	ALALVRMLI	0	0	0	0	0	ALALVRMLI	PEPLIST	0.01162	3.473	0.064937	1.869	24764.7				1	HLA-E*01:03	ALALVRMLI	ALALVRMLI	0	0	0	0	0	ALALVRMLI	PEPLIST	0.01162	3.473	0.064937	1.869	24764.7
	1	HLA-E*01:01	GMKFDRGYI	GMKFDRGYI	0	0	0	0	0	GMKFDRGYI	PEPLIST	0.001115	14.306	0.041487	5.094	31917.1				1	HLA-E*01:03	GMKFDRGYI	GMKFDRGYI	0	0	0	0	0	GMKFDRGYI	PEPLIST	0.001115	14.306	0.041487	5.094	31917.1
	1	HLA-E*01:01	AMAPRTLLL	AMAPRTLLL	0	0	0	0	0	AMAPRTLLL	PEPLIST	0.747838	0.005	0.515106	0.007	189.89	<=	SB		1	HLA-E*01:03	AMAPRTLLL	AMAPRTLLL	0	0	0	0	0	AMAPRTLLL	PEPLIST	0.747838	0.005	0.515106	0.007	189.89	<=	SB
	1	HLA-E*01:01	RRYQKSTEL	RRYQKSTEL	0	0	0	0	0	RRYQKSTEL	PEPLIST	0.12389	0.201	0.08773	0.826	19352.2	<=	SB		1	HLA-E*01:03	RRYQKSTEL	RRYQKSTEL	0	0	0	0	0	RRYQKSTEL	PEPLIST	0.12389	0.201	0.08773	0.826	19352.2	<=	SB
	1	HLA-E*01:01	GRCIQMWFDSAQGN	GRFDSAQGN	0	2	5	0	0	GRCIQMWFDSAQGN	PEPLI	ST 0.0000000	100	00 0.001582	96	25 49151.	43			1	HLA-E*01:03	GRCIQMWFDSAQGN	GRFDSAQGN	0	2	5	0	0	GRCIQMWFDSAQGN	PEPLI	ST 0.0000000	100	00 0.001582	96	25 49151.	43
	1	HLA-E*01:01	MSFLWPVHAEPNPD	MSFPVHAEP	0	3	2	0	0	MSFLWPVHAEP	PEPLIST	0	100	0.00354	79.283	48121.1				1	HLA-E*01:03	MSFLWPVHAEPNPD	MSFPVHAEP	0	3	2	0	0	MSFLWPVHAEP	PEPLIST	0	100	0.00354	79.283	48121.1
	1	HLA-E*01:01	APIVGGEMAVLALL	APIVGGALL	0	6	5	0	0	APIVGGEMAVLALL	PEPLI	ST 0.0000200	52.5	00 0.010985	33.8	83 44396.	81			1	HLA-E*01:03	APIVGGEMAVLALL	APIVGGALL	0	6	5	0	0	APIVGGEMAVLALL	PEPLI	ST 0.0000200	52.5	00 0.010985	33.8	83 44396.	81
	1	HLA-E*01:01	GQGSNGQGSSSHSS	GQGSNSHSS	0	5	5	0	0	GQGSNGQGSSSHSS	PEPLI	ST 0.0000000	100	00 0.001382	96.5	28 49257.	92			1	HLA-E*01:03	GQGSNGQGSSSHSS	GQGSNSHSS	0	5	5	0	0	GQGSNGQGSSSHSS	PEPLI	ST 0.0000000	100	00 0.001382	96.5	28 49257.	92
	1	HLA-E*01:01	LTPFPGPGPRRPPW	LTPFPGPGW	0	8	5	0	0	LTPFPGPGPRRPPW	PEPLI	ST 0.0000830	35.4	29 0.020556	16.9	04 40029.	31			1	HLA-E*01:03	LTPFPGPGPRRPPW	LTPFPGPGW	0	8	5	0	0	LTPFPGPGPRRPPW	PEPLI	ST 0.0000830	35.4	29 0.020556	16.9	04 40029.	31
	1	HLA-E*01:01	YRSGGGFSSGSAGI	YRSGGGFSI	0	8	5	0	0	YRSGGGFSSGSAGI	PEPLI	ST 0.0000200	52.5	00 0.010792	34.4	30 44489.	61			1	HLA-E*01:03	YRSGGGFSSGSAGI	YRSGGGFSI	0	8	5	0	0	YRSGGGFSSGSAGI	PEPLI	ST 0.0000200	52.5	00 0.010792	34.4	30 44489.	61
	1	HLA-E*01:01	SLINNHIPCLISG	SLINNLISG	0	5	4	0	0	SLINNHIPCLISG	PEPLIS	T 0.0000030	80	0 0.007632	46.62	8 46037.0	4			1	HLA-E*01:03	SLINNHIPCLISG	SLINNLISG	0	5	4	0	0	SLINNHIPCLISG	PEPLIS	T 0.0000030	80	0 0.007632	46.62	8 46037.0	4
	1	HLA-E*01:01	PKKTESHHKAKGK	KTESHHKGK	2	6	2	0	0	KTESHHKAKGK	PEPLIST	1e-06	90	0.001551	96.103	49167.9				1	HLA-E*01:03	PKKTESHHKAKGK	KTESHHKGK	2	6	2	0	0	KTESHHKAKGK	PEPLIST	1e-06	90	0.001551	96.103	49167.9
	1	HLA-E*01:01	DVHDGKVVSTHEQ	DVHDGKVEQ	0	7	4	0	0	DVHDGKVVSTHEQ	PEPLIS	T 0.0000000	100	0 0.001442	96.37	7 49225.9	4			1	HLA-E*01:03	DVHDGKVVSTHEQ	DVHDGKVEQ	0	7	4	0	0	DVHDGKVVSTHEQ	PEPLIS	T 0.0000000	100	0 0.001442	96.37	7 49225.9	4
	1	HLA-E*01:01	ASGYVSSADLVFT	ASSADLVFT	0	1	4	0	0	ASGYVSSADLVFT	PEPLIS	T 0.0000010	90	0 0.006160	55.54	9 46776.1	2			1	HLA-E*01:03	ASGYVSSADLVFT	ASSADLVFT	0	1	4	0	0	ASGYVSSADLVFT	PEPLIS	T 0.0000010	90	0 0.006160	55.54	9 46776.1	2
	1	HLA-E*01:01	LDGKVISFEGCAV	LDGKVISAV	0	7	4	0	0	LDGKVISFEGCAV	PEPLIS	T 0.0000010	90	0 0.006492	53.35	0 46608.4	0			1	HLA-E*01:03	LDGKVISFEGCAV	LDGKVISAV	0	7	4	0	0	LDGKVISFEGCAV	PEPLIS	T 0.0000010	90	0 0.006492	53.35	0 46608.4	0
	1	HLA-E*01:01	VSEKGTVQQADE	VSEKGTVQE	0	8	3	0	0	VSEKGTVQQADE	PEPLIST	2e-06	85	0.002393	91.31	48722				1	HLA-E*01:03	VSEKGTVQQADE	VSEKGTVQE	0	8	3	0	0	VSEKGTVQQADE	PEPLIST	2e-06	85	0.002393	91.31	48722
	1	HLA-E*01:01	PRVMTPPSDEPD	RVTPPSDEP	1	2	1	0	0	RVMTPPSDEP	PEPLIST	0	100	0.002632	89.002	48596.2				1	HLA-E*01:03	PRVMTPPSDEPD	RVTPPSDEP	1	2	1	0	0	RVMTPPSDEP	PEPLIST	0	100	0.002632	89.002	48596.2
	1	HLA-E*01:01	AVTFSSLPAAIT	ASSLPAAIT	0	1	3	0	0	AVTFSSLPAAIT	PEPLIST	4e-06	75	0.008443	42.806	45634.8				1	HLA-E*01:03	AVTFSSLPAAIT	ASSLPAAIT	0	1	3	0	0	AVTFSSLPAAIT	PEPLIST	4e-06	75	0.008443	42.806	45634.8
	1	HLA-E*01:01	GPQRCGWPDGLG	GPQRPDGLG	0	4	3	0	0	GPQRCGWPDGLG	PEPLIST	0	100	0.003671	77.88	48053				1	HLA-E*01:03	GPQRCGWPDGLG	GPQRPDGLG	0	4	3	0	0	GPQRCGWPDGLG	PEPLIST	0	100	0.003671	77.88	48053
	1	HLA-E*01:01	PSLTSVTTTFV	PSLTSVTTV	0	8	2	0	0	PSLTSVTTTFV	PEPLIST	2.4e-05	50	0.011484	32.512	44157.8				1	HLA-E*01:03	PSLTSVTTTFV	PSLTSVTTV	0	8	2	0	0	PSLTSVTTTFV	PEPLIST	2.4e-05	50	0.011484	32.512	44157.8
	1	HLA-E*01:01	SKGKIYPVGY	SGKIYPVGY	0	1	1	0	0	SKGKIYPVGY	PEPLIST	0.000258	24.875	0.008126	44.251	45791.6				1	HLA-E*01:03	SKGKIYPVGY	SGKIYPVGY	0	1	1	0	0	SKGKIYPVGY	PEPLIST	0.000258	24.875	0.008126	44.251	45791.6
	1	HLA-E*01:01	PGHCEDVLVL	PGHEDVLVL	0	3	1	0	0	PGHCEDVLVL	PEPLIST	0.000128	31.083	0.010713	34.655	44527.7				1	HLA-E*01:03	PGHCEDVLVL	PGHEDVLVL	0	3	1	0	0	PGHCEDVLVL	PEPLIST	0.000128	31.083	0.010713	34.655	44527.7
	1	HLA-E*01:01	APPPPEPAL	APPPPEPAL	0	0	0	0	0	APPPPEPAL	PEPLIST	0.116592	0.226	0.0619	2.098	25592	<=	SB		1	HLA-E*01:03	APPPPEPAL	APPPPEPAL	0	0	0	0	0	APPPPEPAL	PEPLIST	0.116592	0.226	0.0619	2.098	25592	<=	SB
	1	HLA-E*01:01	QPHPGDQSE	QPHPGDQSE	0	0	0	0	0	QPHPGDQSE	PEPLIST	4.5e-05	42	0.001975	95.038	48942.9				1	HLA-E*01:03	QPHPGDQSE	QPHPGDQSE	0	0	0	0	0	QPHPGDQSE	PEPLIST	4.5e-05	42	0.001975	95.038	48942.9
	1	HLA-E*01:01	ILNFPPPP	ILN-FPPPP	0	0	0	3	1	ILNFPPPP	PEPLIST	0.000118	31.917	0.009697	37.92	45019.8				1	HLA-E*01:03	ILNFPPPP	ILN-FPPPP	0	0	0	3	1	ILNFPPPP	PEPLIST	0.000118	31.917	0.009697	37.92	45019.8
	1	HLA-E*01:01	IVESRPVP	IVESRPVP-	0	0	0	8	1	IVESRPVP	PEPLIST	2.5e-05	49.5	0.004262	71.714	47746.7				1	HLA-E*01:03	IVESRPVP	IVESRPVP-	0	0	0	8	1	IVESRPVP	PEPLIST	2.5e-05	49.5	0.004262	71.714	47746.7
	1	HLA-E*01:01	IIAIFGPG	IIAIFGPG-	0	0	0	8	1	IIAIFGPG	PEPLIST	3e-06	80	0.005279	62.283	47224.2				1	HLA-E*01:03	IIAIFGPG	IIAIFGPG-	0	0	0	8	1	IIAIFGPG	PEPLIST	3e-06	80	0.005279	62.283	47224.2
	1	HLA-E*01:01	MKAAPGVE	MKAAPGVE-	0	0	0	8	1	MKAAPGVE	PEPLIST	7e-06	66.667	0.004013	74.255	47875.5				1	HLA-E*01:03	MKAAPGVE	MKAAPGVE-	0	0	0	8	1	MKAAPGVE	PEPLIST	7e-06	66.667	0.004013	74.255	47875.5
	1	HLA-E*01:01	SLQGRTLIL	SLQGRTLIL	0	0	0	0	0	SLQGRTLIL	PEPLIST	0.194388	0.08	0.177158	0.072	7353.77	<=	SB		1	HLA-E*01:03	SLQGRTLIL	SLQGRTLIL	0	0	0	0	0	SLQGRTLIL	PEPLIST	0.194388	0.08	0.177158	0.072	7353.77	<=	SB
	1	HLA-E*01:01	ASNENMETM	ASNENMETM	0	0	0	0	0	ASNENMETM	PEPLIST	0.039467	1.067	0.064602	1.894	24854.6	<=	WB		1	HLA-E*01:03	ASNENMETM	ASNENMETM	0	0	0	0	0	ASNENMETM	PEPLIST	0.039467	1.067	0.064602	1.894	24854.6	<=	WB
	1	HLA-E*01:01	IYSTVASSL	IYSTVASSL	0	0	0	0	0	IYSTVASSL	PEPLIST	0.077496	0.455	0.110412	0.387	15140.8	<=	SB		1	HLA-E*01:03	IYSTVASSL	IYSTVASSL	0	0	0	0	0	IYSTVASSL	PEPLIST	0.077496	0.455	0.110412	0.387	15140.8	<=	SB
	1	HLA-E*01:01	TYQRTRALV	TYQRTRALV	0	0	0	0	0	TYQRTRALV	PEPLIST	0.008053	4.624	0.056567	2.602	27112.1				1	HLA-E*01:03	TYQRTRALV	TYQRTRALV	0	0	0	0	0	TYQRTRALV	PEPLIST	0.008053	4.624	0.056567	2.602	27112.1
	1	HLA-E*01:01	MSLLGKTQIL	MSLGKTQIL	0	2	1	0	0	MSLLGKTQIL	PEPLIST	0.006807	5.186	0.05455	2.836	27710.3				1	HLA-E*01:03	MSLLGKTQIL	MSLGKTQIL	0	2	1	0	0	MSLLGKTQIL	PEPLIST	0.006807	5.186	0.05455	2.836	27710.3
	1	HLA-E*01:01	MSLLERIPIL	MLLERIPIL	0	1	1	0	0	MSLLERIPIL	PEPLIST	0.008161	4.578	0.0732	1.35	22646.7				1	HLA-E*01:03	MSLLERIPIL	MLLERIPIL	0	1	1	0	0	MSLLERIPIL	PEPLIST	0.008161	4.578	0.0732	1.35	22646.7
	1	HLA-E*01:01	MYLLERIPIL	MLLERIPIL	0	1	1	0	0	MYLLERIPIL	PEPLIST	0.00866	4.388	0.069224	1.572	23642.2				1	HLA-E*01:03	MYLLERIPIL	MLLERIPIL	0	1	1	0	0	MYLLERIPIL	PEPLIST	0.00866	4.388	0.069224	1.572	23642.2
	1	HLA-E*01:01	VSLQERTQIL	VLQERTQIL	0	1	1	0	0	VSLQERTQIL	PEPLIST	0.023531	1.833	0.068399	1.627	23854.2	<=	WB		1	HLA-E*01:03	VSLQERTQIL	VLQERTQIL	0	1	1	0	0	VSLQERTQIL	PEPLIST	0.023531	1.833	0.068399	1.627	23854.2	<=	WB
	1	HLA-E*01:01	MSLQGRTLIL	MLQGRTLIL	0	1	1	0	0	MSLQGRTLIL	PEPLIST	0.01054	3.773	0.085125	0.893	19905.4				1	HLA-E*01:03	MSLQGRTLIL	MLQGRTLIL	0	1	1	0	0	MSLQGRTLIL	PEPLIST	0.01054	3.773	0.085125	0.893	19905.4
	1	HLA-E*01:01	SSLENFRAYV	SSLENFRYV	0	7	1	0	0	SSLENFRAYV	PEPLIST	0.00767	4.787	0.072455	1.387	22830				1	HLA-E*01:03	SSLENFRAYV	SSLENFRYV	0	7	1	0	0	SSLENFRAYV	PEPLIST	0.00767	4.787	0.072455	1.387	22830
	1	HLA-E*01:01	AAAAALAAA	AAAAALAAA	0	0	0	0	0	AAAAALAAA	PEPLIST	0.000589	18.573	0.022205	15.138	39321.4				1	HLA-E*01:03	AAAAALAAA	AAAAALAAA	0	0	0	0	0	AAAAALAAA	PEPLIST	0.000589	18.573	0.022205	15.138	39321.4
	1	HLA-E*01:01	AAAAPARGL	AAAAPARGL	0	0	0	0	0	AAAAPARGL	PEPLIST	0.037341	1.14	0.070452	1.492	23330.2	<=	WB		1	HLA-E*01:03	AAAAPARGL	AAAAPARGL	0	0	0	0	0	AAAAPARGL	PEPLIST	0.037341	1.14	0.070452	1.492	23330.2	<=	WB
	1	HLA-E*01:01	AAAAPLQR	AAA-APLQR	0	0	0	3	1	AAAAPLQR	PEPLIST	5e-05	41	0.00469	67.519	47526.1				1	HLA-E*01:03	AAAAPLQR	AAA-APLQR	0	0	0	3	1	AAAAPLQR	PEPLIST	5e-05	41	0.00469	67.519	47526.1
	1	HLA-E*01:01	AAAPGSRSL	AAAPGSRSL	0	0	0	0	0	AAAPGSRSL	PEPLIST	0.126445	0.195	0.085964	0.871	19725.5	<=	SB		1	HLA-E*01:03	AAAPGSRSL	AAAPGSRSL	0	0	0	0	0	AAAPGSRSL	PEPLIST	0.126445	0.195	0.085964	0.871	19725.5	<=	SB
	1	HLA-E*01:01	AAAPPAKEI	AAAPPAKEI	0	0	0	0	0	AAAPPAKEI	PEPLIST	0.06487	0.576	0.063009	1.999	25286.7	<=	WB		1	HLA-E*01:03	AAAPPAKEI	AAAPPAKEI	0	0	0	0	0	AAAPPAKEI	PEPLIST	0.06487	0.576	0.063009	1.999	25286.7	<=	WB
	1	HLA-E*01:01	AAFAGRATA	AAFAGRATA	0	0	0	0	0	AAFAGRATA	PEPLIST	0.00203	10.673	0.027662	10.807	37067				1	HLA-E*01:03	AAFAGRATA	AAFAGRATA	0	0	0	0	0	AAFAGRATA	PEPLIST	0.00203	10.673	0.027662	10.807	37067
	1	HLA-E*01:01	AAGAYVHMV	AAGAYVHMV	0	0	0	0	0	AAGAYVHMV	PEPLIST	0.008291	4.523	0.043699	4.59	31162.3				1	HLA-E*01:03	AAGAYVHMV	AAGAYVHMV	0	0	0	0	0	AAGAYVHMV	PEPLIST	0.008291	4.523	0.043699	4.59	31162.3
	1	HLA-E*01:01	AAMEFLQEL	AAMEFLQEL	0	0	0	0	0	AAMEFLQEL	PEPLIST	0.156137	0.135	0.112881	0.36	14741.6	<=	SB		1	HLA-E*01:03	AAMEFLQEL	AAMEFLQEL	0	0	0	0	0	AAMEFLQEL	PEPLIST	0.156137	0.135	0.112881	0.36	14741.6	<=	SB
	1	HLA-E*01:01	AASPSGSQL	AASPSGSQL	0	0	0	0	0	AASPSGSQL	PEPLIST	0.111002	0.244	0.085903	0.873	19738.5	<=	SB		1	HLA-E*01:03	AASPSGSQL	AASPSGSQL	0	0	0	0	0	AASPSGSQL	PEPLIST	0.111002	0.244	0.085903	0.873	19738.5	<=	SB
	1	HLA-E*01:01	AAVDAGMAM	AAVDAGMAM	0	0	0	0	0	AAVDAGMAM	PEPLIST	0.005775	5.783	0.038247	6.002	33055.9				1	HLA-E*01:03	AAVDAGMAM	AAVDAGMAM	0	0	0	0	0	AAVDAGMAM	PEPLIST	0.005775	5.783	0.038247	6.002	33055.9
	1	HLA-E*01:01	AAWDKFLSV	AAWDKFLSV	0	0	0	0	0	AAWDKFLSV	PEPLIST	0.093317	0.324	0.078241	1.131	21444.6	<=	SB		1	HLA-E*01:03	AAWDKFLSV	AAWDKFLSV	0	0	0	0	0	AAWDKFLSV	PEPLIST	0.093317	0.324	0.078241	1.131	21444.6	<=	SB
	1	HLA-E*01:01	AGEDPGLAR	AGEDPGLAR	0	0	0	0	0	AGEDPGLAR	PEPLIST	0.000126	31.25	0.006056	56.31	46828.8				1	HLA-E*01:03	AGEDPGLAR	AGEDPGLAR	0	0	0	0	0	AGEDPGLAR	PEPLIST	0.000126	31.25	0.006056	56.31	46828.8
	1	HLA-E*01:01	AGYSGQNSM	AGYSGQNSM	0	0	0	0	0	AGYSGQNSM	PEPLIST	0.039461	1.067	0.059247	2.337	26337.2	<=	WB		1	HLA-E*01:03	AGYSGQNSM	AGYSGQNSM	0	0	0	0	0	AGYSGQNSM	PEPLIST	0.039461	1.067	0.059247	2.337	26337.2	<=	WB
	1	HLA-E*01:01	AIASGIYLL	AIASGIYLL	0	0	0	0	0	AIASGIYLL	PEPLIST	0.057411	0.669	0.089584	0.776	18967.8	<=	WB		1	HLA-E*01:03	AIASGIYLL	AIASGIYLL	0	0	0	0	0	AIASGIYLL	PEPLIST	0.057411	0.669	0.089584	0.776	18967.8	<=	WB
	1	HLA-E*01:01	AIIGGMFTV	AIIGGMFTV	0	0	0	0	0	AIIGGMFTV	PEPLIST	0.005218	6.19	0.038496	5.93	32966.9				1	HLA-E*01:03	AIIGGMFTV	AIIGGMFTV	0	0	0	0	0	AIIGGMFTV	PEPLIST	0.005218	6.19	0.038496	5.93	32966.9
	1	HLA-E*01:01	AIVDKVPSV	AIVDKVPSV	0	0	0	0	0	AIVDKVPSV	PEPLIST	0.062118	0.604	0.05628	2.635	27196.4	<=	WB		1	HLA-E*01:03	AIVDKVPSV	AIVDKVPSV	0	0	0	0	0	AIVDKVPSV	PEPLIST	0.062118	0.604	0.05628	2.635	27196.4	<=	WB
	1	HLA-E*01:01	ALADFAELLRA	ALADFLLRA	0	5	2	0	0	ALADFAELLRA	PEPLIST	0.0001	33.556	0.009697	37.92	45019.8				1	HLA-E*01:03	ALADFAELLRA	ALADFLLRA	0	5	2	0	0	ALADFAELLRA	PEPLIST	0.0001	33.556	0.009697	37.92	45019.8
	1	HLA-E*01:01	ALADGVQKV	ALADGVQKV	0	0	0	0	0	ALADGVQKV	PEPLIST	0.018939	2.287	0.039803	5.555	32504				1	HLA-E*01:03	ALADGVQKV	ALADGVQKV	0	0	0	0	0	ALADGVQKV	PEPLIST	0.018939	2.287	0.039803	5.555	32504
	1	HLA-E*01:01	ALAPGVRAV	ALAPGVRAV	0	0	0	0	0	ALAPGVRAV	PEPLIST	0.034347	1.257	0.062813	2.016	25340.4	<=	WB		1	HLA-E*01:03	ALAPGVRAV	ALAPGVRAV	0	0	0	0	0	ALAPGVRAV	PEPLIST	0.034347	1.257	0.062813	2.016	25340.4	<=	WB
	1	HLA-E*01:01	ALASLIRSV	ALASLIRSV	0	0	0	0	0	ALASLIRSV	PEPLIST	0.02765	1.547	0.054148	2.883	27831.1	<=	WB		1	HLA-E*01:03	ALASLIRSV	ALASLIRSV	0	0	0	0	0	ALASLIRSV	PEPLIST	0.02765	1.547	0.054148	2.883	27831.1	<=	WB
	1	HLA-E*01:01	ALATLIHQV	ALATLIHQV	0	0	0	0	0	ALATLIHQV	PEPLIST	0.034458	1.253	0.048865	3.636	29468.3	<=	WB		1	HLA-E*01:03	ALATLIHQV	ALATLIHQV	0	0	0	0	0	ALATLIHQV	PEPLIST	0.034458	1.253	0.048865	3.636	29468.3	<=	WB
	1	HLA-E*01:01	ALDDMISTL	ALDDMISTL	0	0	0	0	0	ALDDMISTL	PEPLIST	0.244453	0.054	0.13406	0.191	11722.6	<=	SB		1	HLA-E*01:03	ALDDMISTL	ALDDMISTL	0	0	0	0	0	ALDDMISTL	PEPLIST	0.244453	0.054	0.13406	0.191	11722.6	<=	SB
	1	HLA-E*01:01	ALDNGLFTL	ALDNGLFTL	0	0	0	0	0	ALDNGLFTL	PEPLIST	0.121297	0.21	0.113693	0.352	14612.7	<=	SB		1	HLA-E*01:03	ALDNGLFTL	ALDNGLFTL	0	0	0	0	0	ALDNGLFTL	PEPLIST	0.121297	0.21	0.113693	0.352	14612.7	<=	SB
	1	HLA-E*01:01	ALDPFIPIL	ALDPFIPIL	0	0	0	0	0	ALDPFIPIL	PEPLIST	0.363763	0.018	0.200052	0.049	5740.26	<=	SB		1	HLA-E*01:03	ALDPFIPIL	ALDPFIPIL	0	0	0	0	0	ALDPFIPIL	PEPLIST	0.363763	0.018	0.200052	0.049	5740.26	<=	SB
	1	HLA-E*01:01	ALDSTNVEA	ALDSTNVEA	0	0	0	0	0	ALDSTNVEA	PEPLIST	0.001375	12.979	0.021947	15.405	39431.3				1	HLA-E*01:03	ALDSTNVEA	ALDSTNVEA	0	0	0	0	0	ALDSTNVEA	PEPLIST	0.001375	12.979	0.021947	15.405	39431.3
	1	HLA-E*01:01	ALEPIDITV	ALEPIDITV	0	0	0	0	0	ALEPIDITV	PEPLIST	0.015699	2.712	0.043136	4.713	31352.7				1	HLA-E*01:03	ALEPIDITV	ALEPIDITV	0	0	0	0	0	ALEPIDITV	PEPLIST	0.015699	2.712	0.043136	4.713	31352.7
	1	HLA-E*01:01	ALESFLKQV	ALESFLKQV	0	0	0	0	0	ALESFLKQV	PEPLIST	0.002708	9.13	0.023688	13.745	38695.5				1	HLA-E*01:03	ALESFLKQV	ALESFLKQV	0	0	0	0	0	ALESFLKQV	PEPLIST	0.002708	9.13	0.023688	13.745	38695.5
	1	HLA-E*01:01	ALFPAPLAQI	ALPAPLAQI	0	2	1	0	0	ALFPAPLAQI	PEPLIST	0.033954	1.273	0.092889	0.685	18301.5	<=	WB		1	HLA-E*01:03	ALFPAPLAQI	ALPAPLAQI	0	2	1	0	0	ALFPAPLAQI	PEPLIST	0.033954	1.273	0.092889	0.685	18301.5	<=	WB
	1	HLA-E*01:01	ALFPGVALL	ALFPGVALL	0	0	0	0	0	ALFPGVALL	PEPLIST	0.222086	0.062	0.151637	0.128	9692.42	<=	SB		1	HLA-E*01:03	ALFPGVALL	ALFPGVALL	0	0	0	0	0	ALFPGVALL	PEPLIST	0.222086	0.062	0.151637	0.128	9692.42	<=	SB
	1	HLA-E*01:01	ALGPTGRGV	ALGPTGRGV	0	0	0	0	0	ALGPTGRGV	PEPLIST	0.007725	4.763	0.033728	7.651	34712.3				1	HLA-E*01:03	ALGPTGRGV	ALGPTGRGV	0	0	0	0	0	ALGPTGRGV	PEPLIST	0.007725	4.763	0.033728	7.651	34712.3
	1	HLA-E*01:01	ALIDRMVNL	ALIDRMVNL	0	0	0	0	0	ALIDRMVNL	PEPLIST	0.188783	0.086	0.121846	0.272	13378.9	<=	SB		1	HLA-E*01:03	ALIDRMVNL	ALIDRMVNL	0	0	0	0	0	ALIDRMVNL	PEPLIST	0.188783	0.086	0.121846	0.272	13378.9	<=	SB
	1	HLA-E*01:01	ALIEKLVEL	ALIEKLVEL	0	0	0	0	0	ALIEKLVEL	PEPLIST	0.358727	0.018	0.159207	0.11	8930.2	<=	SB		1	HLA-E*01:03	ALIEKLVEL	ALIEKLVEL	0	0	0	0	0	ALIEKLVEL	PEPLIST	0.358727	0.018	0.159207	0.11	8930.2	<=	SB
	1	HLA-E*01:01	ALIEVPDGFTA	ALIPDGFTA	0	3	2	0	0	ALIEVPDGFTA	PEPLIST	0.000131	30.867	0.008416	42.928	45648.2				1	HLA-E*01:03	ALIEVPDGFTA	ALIPDGFTA	0	3	2	0	0	ALIEVPDGFTA	PEPLIST	0.000131	30.867	0.008416	42.928	45648.2
	1	HLA-E*01:01	ALILEPSLYTV	ALIPSLYTV	0	3	2	0	0	ALILEPSLYTV	PEPLIST	0.000761	16.802	0.020207	17.305	40180.7				1	HLA-E*01:03	ALILEPSLYTV	ALIPSLYTV	0	3	2	0	0	ALILEPSLYTV	PEPLIST	0.000761	16.802	0.020207	17.305	40180.7
	1	HLA-E*01:01	ALKDLINEA	ALKDLINEA	0	0	0	0	0	ALKDLINEA	PEPLIST	0.004541	6.753	0.021141	16.254	39776.7				1	HLA-E*01:03	ALKDLINEA	ALKDLINEA	0	0	0	0	0	ALKDLINEA	PEPLIST	0.004541	6.753	0.021141	16.254	39776.7
	1	HLA-E*01:01	ALLDKLYAL	ALLDKLYAL	0	0	0	0	0	ALLDKLYAL	PEPLIST	0.147626	0.15	0.101015	0.525	16761.1	<=	SB		1	HLA-E*01:03	ALLDKLYAL	ALLDKLYAL	0	0	0	0	0	ALLDKLYAL	PEPLIST	0.147626	0.15	0.101015	0.525	16761.1	<=	SB
	1	HLA-E*01:01	ALLDRIVSV	ALLDRIVSV	0	0	0	0	0	ALLDRIVSV	PEPLIST	0.078819	0.442	0.074098	1.306	22427.8	<=	SB		1	HLA-E*01:03	ALLDRIVSV	ALLDRIVSV	0	0	0	0	0	ALLDRIVSV	PEPLIST	0.078819	0.442	0.074098	1.306	22427.8	<=	SB
	1	HLA-E*01:01	ALLEMDARL	ALLEMDARL	0	0	0	0	0	ALLEMDARL	PEPLIST	0.042566	0.976	0.066227	1.774	24421.4	<=	WB		1	HLA-E*01:03	ALLEMDARL	ALLEMDARL	0	0	0	0	0	ALLEMDARL	PEPLIST	0.042566	0.976	0.066227	1.774	24421.4	<=	WB
	1	HLA-E*01:01	ALLERGYSL	ALLERGYSL	0	0	0	0	0	ALLERGYSL	PEPLIST	0.219218	0.063	0.151992	0.127	9655.27	<=	SB		1	HLA-E*01:03	ALLERGYSL	ALLERGYSL	0	0	0	0	0	ALLERGYSL	PEPLIST	0.219218	0.063	0.151992	0.127	9655.27	<=	SB
	1	HLA-E*01:01	ALLLDNMLL	ALLLDNMLL	0	0	0	0	0	ALLLDNMLL	PEPLIST	0.01394	2.991	0.057283	2.518	26902.9				1	HLA-E*01:03	ALLLDNMLL	ALLLDNMLL	0	0	0	0	0	ALLLDNMLL	PEPLIST	0.01394	2.991	0.057283	2.518	26902.9
	1	HLA-E*01:01	ALLTFMEQV	ALLTFMEQV	0	0	0	0	0	ALLTFMEQV	PEPLIST	0.003509	7.861	0.027431	10.947	37159.7				1	HLA-E*01:03	ALLTFMEQV	ALLTFMEQV	0	0	0	0	0	ALLTFMEQV	PEPLIST	0.003509	7.861	0.027431	10.947	37159.7
	1	HLA-E*01:01	ALMDEVVKA	ALMDEVVKA	0	0	0	0	0	ALMDEVVKA	PEPLIST	0.001642	11.875	0.019191	18.525	40624.9				1	HLA-E*01:03	ALMDEVVKA	ALMDEVVKA	0	0	0	0	0	ALMDEVVKA	PEPLIST	0.001642	11.875	0.019191	18.525	40624.9
	1	HLA-E*01:01	ALMPKQATV	ALMPKQATV	0	0	0	0	0	ALMPKQATV	PEPLIST	0.165925	0.119	0.126517	0.236	12719.5	<=	SB		1	HLA-E*01:03	ALMPKQATV	ALMPKQATV	0	0	0	0	0	ALMPKQATV	PEPLIST	0.165925	0.119	0.126517	0.236	12719.5	<=	SB
	1	HLA-E*01:01	ALMYESEKV	ALMYESEKV	0	0	0	0	0	ALMYESEKV	PEPLIST	0.008432	4.469	0.041545	5.078	31897.1				1	HLA-E*01:03	ALMYESEKV	ALMYESEKV	0	0	0	0	0	ALMYESEKV	PEPLIST	0.008432	4.469	0.041545	5.078	31897.1
	1	HLA-E*01:01	ALNEKLVNL	ALNEKLVNL	0	0	0	0	0	ALNEKLVNL	PEPLIST	0.265643	0.042	0.134491	0.19	11668.1	<=	SB		1	HLA-E*01:03	ALNEKLVNL	ALNEKLVNL	0	0	0	0	0	ALNEKLVNL	PEPLIST	0.265643	0.042	0.134491	0.19	11668.1	<=	SB
	1	HLA-E*01:01	ALNELLQHV	ALNELLQHV	0	0	0	0	0	ALNELLQHV	PEPLIST	0.039141	1.077	0.050362	3.403	28994.8	<=	WB		1	HLA-E*01:03	ALNELLQHV	ALNELLQHV	0	0	0	0	0	ALNELLQHV	PEPLIST	0.039141	1.077	0.050362	3.403	28994.8	<=	WB
	1	HLA-E*01:01	ALPDQGIAKA	ALPDGIAKA	0	4	1	0	0	ALPDQGIAKA	PEPLIST	0.001504	12.427	0.020526	16.938	40042.3				1	HLA-E*01:03	ALPDQGIAKA	ALPDGIAKA	0	4	1	0	0	ALPDQGIAKA	PEPLIST	0.001504	12.427	0.020526	16.938	40042.3
	1	HLA-E*01:01	ALPEIFTEL	ALPEIFTEL	0	0	0	0	0	ALPEIFTEL	PEPLIST	0.506183	0.01	0.255985	0.02	3134.04	<=	SB		1	HLA-E*01:03	ALPEIFTEL	ALPEIFTEL	0	0	0	0	0	ALPEIFTEL	PEPLIST	0.506183	0.01	0.255985	0.02	3134.04	<=	SB
	1	HLA-E*01:01	ALPFTKSLSL	ALPTKSLSL	0	3	1	0	0	ALPFTKSLSL	PEPLIST	0.147592	0.15	0.17618	0.075	7432	<=	SB		1	HLA-E*01:03	ALPFTKSLSL	ALPTKSLSL	0	3	1	0	0	ALPFTKSLSL	PEPLIST	0.147592	0.15	0.17618	0.075	7432	<=	SB
	1	HLA-E*01:01	ALQEMVHQV	ALQEMVHQV	0	0	0	0	0	ALQEMVHQV	PEPLIST	0.05957	0.639	0.058325	2.42	26601.3	<=	WB		1	HLA-E*01:03	ALQEMVHQV	ALQEMVHQV	0	0	0	0	0	ALQEMVHQV	PEPLIST	0.05957	0.639	0.058325	2.42	26601.3	<=	WB
	1	HLA-E*01:01	ALSDGVHKI	ALSDGVHKI	0	0	0	0	0	ALSDGVHKI	PEPLIST	0.062787	0.596	0.063264	1.982	25217	<=	WB		1	HLA-E*01:03	ALSDGVHKI	ALSDGVHKI	0	0	0	0	0	ALSDGVHKI	PEPLIST	0.062787	0.596	0.063264	1.982	25217	<=	WB
	1	HLA-E*01:01	ALSEELVQL	ALSEELVQL	0	0	0	0	0	ALSEELVQL	PEPLIST	0.121374	0.21	0.091462	0.722	18586.3	<=	SB		1	HLA-E*01:03	ALSEELVQL	ALSEELVQL	0	0	0	0	0	ALSEELVQL	PEPLIST	0.121374	0.21	0.091462	0.722	18586.3	<=	SB
	1	HLA-E*01:01	ALTGHLEEV	ALTGHLEEV	0	0	0	0	0	ALTGHLEEV	PEPLIST	0.008597	4.41	0.043678	4.594	31169.4				1	HLA-E*01:03	ALTGHLEEV	ALTGHLEEV	0	0	0	0	0	ALTGHLEEV	PEPLIST	0.008597	4.41	0.043678	4.594	31169.4
	1	HLA-E*01:01	ALTNAVAHV	ALTNAVAHV	0	0	0	0	0	ALTNAVAHV	PEPLIST	0.007182	4.994	0.0447	4.383	30826.6				1	HLA-E*01:03	ALTNAVAHV	ALTNAVAHV	0	0	0	0	0	ALTNAVAHV	PEPLIST	0.007182	4.994	0.0447	4.383	30826.6
	1	HLA-E*01:01	ALVSAALLL	ALVSAALLL	0	0	0	0	0	ALVSAALLL	PEPLIST	0.045025	0.906	0.099694	0.547	17002.4	<=	WB		1	HLA-E*01:03	ALVSAALLL	ALVSAALLL	0	0	0	0	0	ALVSAALLL	PEPLIST	0.045025	0.906	0.099694	0.547	17002.4	<=	WB
	1	HLA-E*01:01	ALVVQVAEA	ALVVQVAEA	0	0	0	0	0	ALVVQVAEA	PEPLIST	0.000318	23.179	0.013564	27.538	43175.1				1	HLA-E*01:03	ALVVQVAEA	ALVVQVAEA	0	0	0	0	0	ALVVQVAEA	PEPLIST	0.000318	23.179	0.013564	27.538	43175.1
	1	HLA-E*01:01	ALWDIETGQQTV	ALWDGQQTV	0	4	3	0	0	ALWDIETGQQTV	PEPLIST	0.000208	26.708	0.012747	29.309	43558.4				1	HLA-E*01:03	ALWDIETGQQTV	ALWDGQQTV	0	4	3	0	0	ALWDIETGQQTV	PEPLIST	0.000208	26.708	0.012747	29.309	43558.4
	1	HLA-E*01:01	ALYDENTKL	ALYDENTKL	0	0	0	0	0	ALYDENTKL	PEPLIST	0.101871	0.279	0.074258	1.299	22389	<=	SB		1	HLA-E*01:03	ALYDENTKL	ALYDENTKL	0	0	0	0	0	ALYDENTKL	PEPLIST	0.101871	0.279	0.074258	1.299	22389	<=	SB
	1	HLA-E*01:01	AMADLEQKV	AMADLEQKV	0	0	0	0	0	AMADLEQKV	PEPLIST	0.026789	1.593	0.045781	4.171	30468.2	<=	WB		1	HLA-E*01:03	AMADLEQKV	AMADLEQKV	0	0	0	0	0	AMADLEQKV	PEPLIST	0.026789	1.593	0.045781	4.171	30468.2	<=	WB
	1	HLA-E*01:01	AMASHLTST	AMASHLTST	0	0	0	0	0	AMASHLTST	PEPLIST	0.002251	10.085	0.033306	7.826	34871.1				1	HLA-E*01:03	AMASHLTST	AMASHLTST	0	0	0	0	0	AMASHLTST	PEPLIST	0.002251	10.085	0.033306	7.826	34871.1
	1	HLA-E*01:01	AMEQSIKSV	AMEQSIKSV	0	0	0	0	0	AMEQSIKSV	PEPLIST	0.016089	2.651	0.040854	5.266	32136.5				1	HLA-E*01:03	AMEQSIKSV	AMEQSIKSV	0	0	0	0	0	AMEQSIKSV	PEPLIST	0.016089	2.651	0.040854	5.266	32136.5
	1	HLA-E*01:01	AMFENFVSV	AMFENFVSV	0	0	0	0	0	AMFENFVSV	PEPLIST	0.143182	0.159	0.130281	0.21	12211.9	<=	SB		1	HLA-E*01:03	AMFENFVSV	AMFENFVSV	0	0	0	0	0	AMFENFVSV	PEPLIST	0.143182	0.159	0.130281	0.21	12211.9	<=	SB
	1	HLA-E*01:01	AMFNGGMATT	AMFNGGMTT	0	7	1	0	0	AMFNGGMATT	PEPLIST	0.000212	26.542	0.016231	22.583	41947				1	HLA-E*01:03	AMFNGGMATT	AMFNGGMTT	0	7	1	0	0	AMFNGGMATT	PEPLIST	0.000212	26.542	0.016231	22.583	41947
	1	HLA-E*01:01	AMFNGNYMEA	AMFNGYMEA	0	5	1	0	0	AMFNGNYMEA	PEPLIST	0.000248	25.207	0.02317	14.199	38913				1	HLA-E*01:03	AMFNGNYMEA	AMFNGYMEA	0	5	1	0	0	AMFNGNYMEA	PEPLIST	0.000248	25.207	0.02317	14.199	38913
	1	HLA-E*01:01	AMIELVERL	AMIELVERL	0	0	0	0	0	AMIELVERL	PEPLIST	0.162491	0.124	0.108673	0.408	15428.3	<=	SB		1	HLA-E*01:03	AMIELVERL	AMIELVERL	0	0	0	0	0	AMIELVERL	PEPLIST	0.162491	0.124	0.108673	0.408	15428.3	<=	SB
	1	HLA-E*01:01	AMLERLLSL	AMLERLLSL	0	0	0	0	0	AMLERLLSL	PEPLIST	0.373019	0.017	0.22493	0.031	4385.62	<=	SB		1	HLA-E*01:03	AMLERLLSL	AMLERLLSL	0	0	0	0	0	AMLERLLSL	PEPLIST	0.373019	0.017	0.22493	0.031	4385.62	<=	SB
	1	HLA-E*01:01	AMLGQAEEV	AMLGQAEEV	0	0	0	0	0	AMLGQAEEV	PEPLIST	0.007956	4.665	0.046434	4.042	30253.7				1	HLA-E*01:03	AMLGQAEEV	AMLGQAEEV	0	0	0	0	0	AMLGQAEEV	PEPLIST	0.007956	4.665	0.046434	4.042	30253.7
	1	HLA-E*01:01	AMPDSPAEV	AMPDSPAEV	0	0	0	0	0	AMPDSPAEV	PEPLIST	0.204111	0.072	0.16107	0.106	8751.99	<=	SB		1	HLA-E*01:03	AMPDSPAEV	AMPDSPAEV	0	0	0	0	0	AMPDSPAEV	PEPLIST	0.204111	0.072	0.16107	0.106	8751.99	<=	SB
	1	HLA-E*01:01	AMPPPPPQGV	AMPPPPPQV	0	8	1	0	0	AMPPPPPQGV	PEPLIST	0.179388	0.099	0.106628	0.439	15773.5	<=	SB		1	HLA-E*01:03	AMPPPPPQGV	AMPPPPPQV	0	8	1	0	0	AMPPPPPQGV	PEPLIST	0.179388	0.099	0.106628	0.439	15773.5	<=	SB
	1	HLA-E*01:01	AMPQSGTGV	AMPQSGTGV	0	0	0	0	0	AMPQSGTGV	PEPLIST	0.081478	0.417	0.128946	0.219	12389.6	<=	SB		1	HLA-E*01:03	AMPQSGTGV	AMPQSGTGV	0	0	0	0	0	AMPQSGTGV	PEPLIST	0.081478	0.417	0.128946	0.219	12389.6	<=	SB
	1	HLA-E*01:01	AMQDRYMEV	AMQDRYMEV	0	0	0	0	0	AMQDRYMEV	PEPLIST	0.081914	0.413	0.117854	0.307	13969.4	<=	SB		1	HLA-E*01:03	AMQDRYMEV	AMQDRYMEV	0	0	0	0	0	AMQDRYMEV	PEPLIST	0.081914	0.413	0.117854	0.307	13969.4	<=	SB
	1	HLA-E*01:01	AMTKDNNLL	AMTKDNNLL	0	0	0	0	0	AMTKDNNLL	PEPLIST	0.034057	1.269	0.086754	0.851	19557.6	<=	WB		1	HLA-E*01:03	AMTKDNNLL	AMTKDNNLL	0	0	0	0	0	AMTKDNNLL	PEPLIST	0.034057	1.269	0.086754	0.851	19557.6	<=	WB
	1	HLA-E*01:01	AMVDYLQKA	AMVDYLQKA	0	0	0	0	0	AMVDYLQKA	PEPLIST	0.002027	10.681	0.022803	14.553	39067.8				1	HLA-E*01:03	AMVDYLQKA	AMVDYLQKA	0	0	0	0	0	AMVDYLQKA	PEPLIST	0.002027	10.681	0.022803	14.553	39067.8
	1	HLA-E*01:01	APPPPPPPP	APPPPPPPP	0	0	0	0	0	APPPPPPPP	PEPLIST	0.002975	8.663	0.013247	28.19	43323.4				1	HLA-E*01:03	APPPPPPPP	APPPPPPPP	0	0	0	0	0	APPPPPPPP	PEPLIST	0.002975	8.663	0.013247	28.19	43323.4
	1	HLA-E*01:01	ARVLSLLEV	ARVLSLLEV	0	0	0	0	0	ARVLSLLEV	PEPLIST	0.00465	6.66	0.021759	15.599	39511.7				1	HLA-E*01:03	ARVLSLLEV	ARVLSLLEV	0	0	0	0	0	ARVLSLLEV	PEPLIST	0.00465	6.66	0.021759	15.599	39511.7
	1	HLA-E*01:01	ASSPEHPEL	ASSPEHPEL	0	0	0	0	0	ASSPEHPEL	PEPLIST	0.206243	0.07	0.132983	0.195	11860.1	<=	SB		1	HLA-E*01:03	ASSPEHPEL	ASSPEHPEL	0	0	0	0	0	ASSPEHPEL	PEPLIST	0.206243	0.07	0.132983	0.195	11860.1	<=	SB
	1	HLA-E*01:01	ATDPTIHTV	ATDPTIHTV	0	0	0	0	0	ATDPTIHTV	PEPLIST	0.217171	0.064	0.105076	0.462	16040.6	<=	SB		1	HLA-E*01:03	ATDPTIHTV	ATDPTIHTV	0	0	0	0	0	ATDPTIHTV	PEPLIST	0.217171	0.064	0.105076	0.462	16040.6	<=	SB
	1	HLA-E*01:01	AVALRPAEA	AVALRPAEA	0	0	0	0	0	AVALRPAEA	PEPLIST	0.004305	6.955	0.028187	10.49	36857				1	HLA-E*01:03	AVALRPAEA	AVALRPAEA	0	0	0	0	0	AVALRPAEA	PEPLIST	0.004305	6.955	0.028187	10.49	36857
	1	HLA-E*01:01	AVDGKEMVTM	AVDGKMVTM	0	5	1	0	0	AVDGKEMVTM	PEPLIST	0.00778	4.74	0.029943	9.45	36163.4				1	HLA-E*01:03	AVDGKEMVTM	AVDGKMVTM	0	5	1	0	0	AVDGKEMVTM	PEPLIST	0.00778	4.74	0.029943	9.45	36163.4
	1	HLA-E*01:01	AVHETLVAV	AVHETLVAV	0	0	0	0	0	AVHETLVAV	PEPLIST	0.016882	2.525	0.043925	4.54	31086.2				1	HLA-E*01:03	AVHETLVAV	AVHETLVAV	0	0	0	0	0	AVHETLVAV	PEPLIST	0.016882	2.525	0.043925	4.54	31086.2
	1	HLA-E*01:01	AVIDVGINRV	AVIDGINRV	0	4	1	0	0	AVIDVGINRV	PEPLIST	0.000802	16.448	0.019132	18.599	40650.8				1	HLA-E*01:03	AVIDVGINRV	AVIDGINRV	0	4	1	0	0	AVIDVGINRV	PEPLIST	0.000802	16.448	0.019132	18.599	40650.8
	1	HLA-E*01:01	CVRPDQCECAPGW	CVRPDQPGW	0	6	4	0	0	CVRPDQCECAPGW	PEPLIS	T 0.0000050	70	0 0.007851	45.53	6 45928.0	9			1	HLA-E*01:03	CVRPDQCECAPGW	CVRPDQPGW	0	6	4	0	0	CVRPDQCECAPGW	PEPLIS	T 0.0000050	70	0 0.007851	45.53	6 45928.0	9
	1	HLA-E*01:01	DDLALLKNL	DDLALLKNL	0	0	0	0	0	DDLALLKNL	PEPLIST	0.001599	12.021	0.012083	30.91	43872.5				1	HLA-E*01:03	DDLALLKNL	DDLALLKNL	0	0	0	0	0	DDLALLKNL	PEPLIST	0.001599	12.021	0.012083	30.91	43872.5
	1	HLA-E*01:01	DINTDGAVNF	DINDGAVNF	0	3	1	0	0	DINTDGAVNF	PEPLIST	0.000303	23.564	0.009922	37.133	44910.4				1	HLA-E*01:03	DINTDGAVNF	DINDGAVNF	0	3	1	0	0	DINTDGAVNF	PEPLIST	0.000303	23.564	0.009922	37.133	44910.4
	1	HLA-E*01:01	DTNADKQL	DTNADK-QL	0	0	0	6	1	DTNADKQL	PEPLIST	0.00027	24.5	0.004497	69.361	47625.4				1	HLA-E*01:03	DTNADKQL	DTNADK-QL	0	0	0	6	1	DTNADKQL	PEPLIST	0.00027	24.5	0.004497	69.361	47625.4
	1	HLA-E*01:01	DTNADKQLS	DTNADKQLS	0	0	0	0	0	DTNADKQLS	PEPLIST	3e-06	80	0.002207	93.013	48820.2				1	HLA-E*01:03	DTNADKQLS	DTNADKQLS	0	0	0	0	0	DTNADKQLS	PEPLIST	3e-06	80	0.002207	93.013	48820.2
	1	HLA-E*01:01	DTNADKQLSF	DTNAKQLSF	0	4	1	0	0	DTNADKQLSF	PEPLIST	0.001124	14.254	0.013375	27.918	43263.5				1	HLA-E*01:03	DTNADKQLSF	DTNAKQLSF	0	4	1	0	0	DTNADKQLSF	PEPLIST	0.001124	14.254	0.013375	27.918	43263.5
	1	HLA-E*01:01	EAQEVKTV	EAQEVK-TV	0	0	0	6	1	EAQEVKTV	PEPLIST	0.001133	14.202	0.006449	53.626	46630.1				1	HLA-E*01:03	EAQEVKTV	EAQEVK-TV	0	0	0	6	1	EAQEVKTV	PEPLIST	0.001133	14.202	0.006449	53.626	46630.1
	1	HLA-E*01:01	EDLMKLII	EDLMK-LII	0	0	0	5	1	EDLMKLII	PEPLIST	0.000184	27.739	0.010161	36.35	44794.4				1	HLA-E*01:03	EDLMKLII	EDLMK-LII	0	0	0	5	1	EDLMKLII	PEPLIST	0.000184	27.739	0.010161	36.35	44794.4
	1	HLA-E*01:01	EGKLEQTV	EGK-LEQTV	0	0	0	3	1	EGKLEQTV	PEPLIST	0.000167	28.611	0.00759	46.842	46058				1	HLA-E*01:03	EGKLEQTV	EGK-LEQTV	0	0	0	3	1	EGKLEQTV	PEPLIST	0.000167	28.611	0.00759	46.842	46058
	1	HLA-E*01:01	EGLKFVEGV	EGLKFVEGV	0	0	0	0	0	EGLKFVEGV	PEPLIST	0.00161	11.98	0.015952	23.012	42073.8				1	HLA-E*01:03	EGLKFVEGV	EGLKFVEGV	0	0	0	0	0	EGLKFVEGV	PEPLIST	0.00161	11.98	0.015952	23.012	42073.8
	1	HLA-E*01:01	ENAGEDPGLAR	ENADPGLAR	0	3	2	0	0	ENAGEDPGLAR	PEPLIST	5e-06	70	0.002118	93.828	48867.2				1	HLA-E*01:03	ENAGEDPGLAR	ENADPGLAR	0	3	2	0	0	ENAGEDPGLAR	PEPLIST	5e-06	70	0.002118	93.828	48867.2
	1	HLA-E*01:01	FAEGQGRAL	FAEGQGRAL	0	0	0	0	0	FAEGQGRAL	PEPLIST	0.011534	3.491	0.035316	7.03	34121				1	HLA-E*01:03	FAEGQGRAL	FAEGQGRAL	0	0	0	0	0	FAEGQGRAL	PEPLIST	0.011534	3.491	0.035316	7.03	34121
	1	HLA-E*01:01	FANGRSTGL	FANGRSTGL	0	0	0	0	0	FANGRSTGL	PEPLIST	0.030517	1.405	0.057987	2.451	26698.8	<=	WB		1	HLA-E*01:03	FANGRSTGL	FANGRSTGL	0	0	0	0	0	FANGRSTGL	PEPLIST	0.030517	1.405	0.057987	2.451	26698.8	<=	WB
	1	HLA-E*01:01	FASHVSPEV	FASHVSPEV	0	0	0	0	0	FASHVSPEV	PEPLIST	0.018088	2.382	0.057224	2.525	26920.1				1	HLA-E*01:03	FASHVSPEV	FASHVSPEV	0	0	0	0	0	FASHVSPEV	PEPLIST	0.018088	2.382	0.057224	2.525	26920.1
	1	HLA-E*01:01	FGEMGGKFM	FGEMGGKFM	0	0	0	0	0	FGEMGGKFM	PEPLIST	0.001265	13.52	0.023738	13.704	38674.6				1	HLA-E*01:03	FGEMGGKFM	FGEMGGKFM	0	0	0	0	0	FGEMGGKFM	PEPLIST	0.001265	13.52	0.023738	13.704	38674.6
	1	HLA-E*01:01	FLAEEGFYKF	FLAEEFYKF	0	5	1	0	0	FLAEEGFYKF	PEPLIST	0.003628	7.72	0.03604	6.777	33854.7				1	HLA-E*01:03	FLAEEGFYKF	FLAEEFYKF	0	5	1	0	0	FLAEEGFYKF	PEPLIST	0.003628	7.72	0.03604	6.777	33854.7
	1	HLA-E*01:01	FLAPWATIA	FLAPWATIA	0	0	0	0	0	FLAPWATIA	PEPLIST	0.000296	23.744	0.021583	15.78	39586.9				1	HLA-E*01:03	FLAPWATIA	FLAPWATIA	0	0	0	0	0	FLAPWATIA	PEPLIST	0.000296	23.744	0.021583	15.78	39586.9
	1	HLA-E*01:01	FLASESLIKQI	FLASESLQI	0	7	2	0	0	FLASESLIKQI	PEPLIST	0.001361	13.045	0.019601	18.009	40445.1				1	HLA-E*01:03	FLASESLIKQI	FLASESLQI	0	7	2	0	0	FLASESLIKQI	PEPLIST	0.001361	13.045	0.019601	18.009	40445.1
	1	HLA-E*01:01	FLDEPTNHL	FLDEPTNHL	0	0	0	0	0	FLDEPTNHL	PEPLIST	0.309582	0.026	0.13215	0.198	11967.4	<=	SB		1	HLA-E*01:03	FLDEPTNHL	FLDEPTNHL	0	0	0	0	0	FLDEPTNHL	PEPLIST	0.309582	0.026	0.13215	0.198	11967.4	<=	SB
	1	HLA-E*01:01	FLDSEVSEL	FLDSEVSEL	0	0	0	0	0	FLDSEVSEL	PEPLIST	0.11348	0.236	0.102339	0.503	16522.7	<=	SB		1	HLA-E*01:03	FLDSEVSEL	FLDSEVSEL	0	0	0	0	0	FLDSEVSEL	PEPLIST	0.11348	0.236	0.102339	0.503	16522.7	<=	SB
	1	HLA-E*01:01	FLFDTQHFI	FLFDTQHFI	0	0	0	0	0	FLFDTQHFI	PEPLIST	0.081175	0.42	0.106178	0.445	15850.5	<=	SB		1	HLA-E*01:03	FLFDTQHFI	FLFDTQHFI	0	0	0	0	0	FLFDTQHFI	PEPLIST	0.081175	0.42	0.106178	0.445	15850.5	<=	SB
	1	HLA-E*01:01	FLFPRSIDV	FLFPRSIDV	0	0	0	0	0	FLFPRSIDV	PEPLIST	0.031373	1.372	0.084688	0.905	19999.7	<=	WB		1	HLA-E*01:03	FLFPRSIDV	FLFPRSIDV	0	0	0	0	0	FLFPRSIDV	PEPLIST	0.031373	1.372	0.084688	0.905	19999.7	<=	WB
	1	HLA-E*01:01	FLGENISNFL	FLENISNFL	0	2	1	0	0	FLGENISNFL	PEPLIST	0.006411	5.389	0.050171	3.431	29054.8				1	HLA-E*01:03	FLGENISNFL	FLENISNFL	0	2	1	0	0	FLGENISNFL	PEPLIST	0.006411	5.389	0.050171	3.431	29054.8
	1	HLA-E*01:01	FLLDGFPRTV	FLDGFPRTV	0	1	1	0	0	FLLDGFPRTV	PEPLIST	0.00327	8.19	0.0368	6.515	33577.5				1	HLA-E*01:03	FLLDGFPRTV	FLDGFPRTV	0	1	1	0	0	FLLDGFPRTV	PEPLIST	0.00327	8.19	0.0368	6.515	33577.5
	1	HLA-E*01:01	FLLGPRLVLA	FLLPRLVLA	0	3	1	0	0	FLLGPRLVLA	PEPLIST	0.000444	20.644	0.018754	19.074	40817.4				1	HLA-E*01:03	FLLGPRLVLA	FLLPRLVLA	0	3	1	0	0	FLLGPRLVLA	PEPLIST	0.000444	20.644	0.018754	19.074	40817.4
	1	HLA-E*01:01	FLLLPGPSAA	FLLLPPSAA	0	5	1	0	0	FLLLPGPSAA	PEPLIST	0.00021	26.625	0.011319	32.954	44236.7				1	HLA-E*01:03	FLLLPGPSAA	FLLLPPSAA	0	5	1	0	0	FLLLPGPSAA	PEPLIST	0.00021	26.625	0.011319	32.954	44236.7
	1	HLA-E*01:01	FLMDFIHQV	FLMDFIHQV	0	0	0	0	0	FLMDFIHQV	PEPLIST	0.092908	0.327	0.082216	0.989	20541.8	<=	SB		1	HLA-E*01:03	FLMDFIHQV	FLMDFIHQV	0	0	0	0	0	FLMDFIHQV	PEPLIST	0.092908	0.327	0.082216	0.989	20541.8	<=	SB
	1	HLA-E*01:01	FLQEGDLISA	FLQEGLISA	0	5	1	0	0	FLQEGDLISA	PEPLIST	0.00014	30.267	0.009365	39.094	45181.9				1	HLA-E*01:03	FLQEGDLISA	FLQEGLISA	0	5	1	0	0	FLQEGDLISA	PEPLIST	0.00014	30.267	0.009365	39.094	45181.9
	1	HLA-E*01:01	FLSEHPNVTL	FLSEHPVTL	0	6	1	0	0	FLSEHPNVTL	PEPLIST	0.06725	0.553	0.10064	0.531	16829.3	<=	WB		1	HLA-E*01:03	FLSEHPNVTL	FLSEHPVTL	0	6	1	0	0	FLSEHPNVTL	PEPLIST	0.06725	0.553	0.10064	0.531	16829.3	<=	WB
	1	HLA-E*01:01	FLSKQQASQV	FLSKQQAQV	0	7	1	0	0	FLSKQQASQV	PEPLIST	0.000785	16.595	0.021922	15.43	39442				1	HLA-E*01:03	FLSKQQASQV	FLSKQQAQV	0	7	1	0	0	FLSKQQASQV	PEPLIST	0.000785	16.595	0.021922	15.43	39442
	1	HLA-E*01:01	FLSKQQASQVLV	FQQASQVLV	0	1	3	0	0	FLSKQQASQVLV	PEPLIST	0.000156	29.25	0.02219	15.154	39327.8				1	HLA-E*01:03	FLSKQQASQVLV	FQQASQVLV	0	1	3	0	0	FLSKQQASQVLV	PEPLIST	0.000156	29.25	0.02219	15.154	39327.8
	1	HLA-E*01:01	FLWKEPATM	FLWKEPATM	0	0	0	0	0	FLWKEPATM	PEPLIST	0.048304	0.836	0.067679	1.673	24040.8	<=	WB		1	HLA-E*01:03	FLWKEPATM	FLWKEPATM	0	0	0	0	0	FLWKEPATM	PEPLIST	0.048304	0.836	0.067679	1.673	24040.8	<=	WB
	1	HLA-E*01:01	FLYPFPLAL	FLYPFPLAL	0	0	0	0	0	FLYPFPLAL	PEPLIST	0.323027	0.023	0.185825	0.058	6695.51	<=	SB		1	HLA-E*01:03	FLYPFPLAL	FLYPFPLAL	0	0	0	0	0	FLYPFPLAL	PEPLIST	0.323027	0.023	0.185825	0.058	6695.51	<=	SB
	1	HLA-E*01:01	FNDPNAKEM	FNDPNAKEM	0	0	0	0	0	FNDPNAKEM	PEPLIST	0.028734	1.49	0.043669	4.596	31172.4	<=	WB		1	HLA-E*01:03	FNDPNAKEM	FNDPNAKEM	0	0	0	0	0	FNDPNAKEM	PEPLIST	0.028734	1.49	0.043669	4.596	31172.4	<=	WB
	1	HLA-E*01:01	FQDPVPLTV	FQDPVPLTV	0	0	0	0	0	FQDPVPLTV	PEPLIST	0.351787	0.019	0.134761	0.189	11634.1	<=	SB		1	HLA-E*01:03	FQDPVPLTV	FQDPVPLTV	0	0	0	0	0	FQDPVPLTV	PEPLIST	0.351787	0.019	0.134761	0.189	11634.1	<=	SB
	1	HLA-E*01:01	FQSMLHPVM	FQSMLHPVM	0	0	0	0	0	FQSMLHPVM	PEPLIST	0.050988	0.782	0.100415	0.535	16870.3	<=	WB		1	HLA-E*01:03	FQSMLHPVM	FQSMLHPVM	0	0	0	0	0	FQSMLHPVM	PEPLIST	0.050988	0.782	0.100415	0.535	16870.3	<=	WB
	1	HLA-E*01:01	FVDDYTVRV	FVDDYTVRV	0	0	0	0	0	FVDDYTVRV	PEPLIST	0.042074	0.99	0.055581	2.716	27402.9	<=	WB		1	HLA-E*01:03	FVDDYTVRV	FVDDYTVRV	0	0	0	0	0	FVDDYTVRV	PEPLIST	0.042074	0.99	0.055581	2.716	27402.9	<=	WB
	1	HLA-E*01:01	FVFPGELLL	FVFPGELLL	0	0	0	0	0	FVFPGELLL	PEPLIST	0.138492	0.168	0.117627	0.309	14003.7	<=	SB		1	HLA-E*01:03	FVFPGELLL	FVFPGELLL	0	0	0	0	0	FVFPGELLL	PEPLIST	0.138492	0.168	0.117627	0.309	14003.7	<=	SB
	1	HLA-E*01:01	FVLPELPSV	FVLPELPSV	0	0	0	0	0	FVLPELPSV	PEPLIST	0.020787	2.079	0.049481	3.535	29272.5				1	HLA-E*01:03	FVLPELPSV	FVLPELPSV	0	0	0	0	0	FVLPELPSV	PEPLIST	0.020787	2.079	0.049481	3.535	29272.5
	1	HLA-E*01:01	GADGVMRTM	GADGVMRTM	0	0	0	0	0	GADGVMRTM	PEPLIST	0.010648	3.742	0.028264	10.443	36826.3				1	HLA-E*01:03	GADGVMRTM	GADGVMRTM	0	0	0	0	0	GADGVMRTM	PEPLIST	0.010648	3.742	0.028264	10.443	36826.3
	1	HLA-E*01:01	GALTPVQA	GALT-PVQA	0	0	0	4	1	GALTPVQA	PEPLIST	3e-05	47	0.003293	81.974	48249.9				1	HLA-E*01:03	GALTPVQA	GALT-PVQA	0	0	0	4	1	GALTPVQA	PEPLIST	3e-05	47	0.003293	81.974	48249.9
	1	HLA-E*01:01	GILGIQPPSV	GILGIPPSV	0	5	1	0	0	GILGIQPPSV	PEPLIST	0.000349	22.467	0.01366	27.345	43130.2				1	HLA-E*01:03	GILGIQPPSV	GILGIPPSV	0	5	1	0	0	GILGIQPPSV	PEPLIST	0.000349	22.467	0.01366	27.345	43130.2
	1	HLA-E*01:01	GLAARMSQV	GLAARMSQV	0	0	0	0	0	GLAARMSQV	PEPLIST	0.003796	7.521	0.037638	6.218	33274.4				1	HLA-E*01:03	GLAARMSQV	GLAARMSQV	0	0	0	0	0	GLAARMSQV	PEPLIST	0.003796	7.521	0.037638	6.218	33274.4
	1	HLA-E*01:01	GLADKVYFL	GLADKVYFL	0	0	0	0	0	GLADKVYFL	PEPLIST	0.115074	0.231	0.110465	0.387	15132.1	<=	SB		1	HLA-E*01:03	GLADKVYFL	GLADKVYFL	0	0	0	0	0	GLADKVYFL	PEPLIST	0.115074	0.231	0.110465	0.387	15132.1	<=	SB
	1	HLA-E*01:01	GLAEDSPKM	GLAEDSPKM	0	0	0	0	0	GLAEDSPKM	PEPLIST	0.008668	4.385	0.035836	6.848	33929.5				1	HLA-E*01:03	GLAEDSPKM	GLAEDSPKM	0	0	0	0	0	GLAEDSPKM	PEPLIST	0.008668	4.385	0.035836	6.848	33929.5
	1	HLA-E*01:01	GLATDVQTV	GLATDVQTV	0	0	0	0	0	GLATDVQTV	PEPLIST	0.002665	9.216	0.025486	12.331	37950				1	HLA-E*01:03	GLATDVQTV	GLATDVQTV	0	0	0	0	0	GLATDVQTV	PEPLIST	0.002665	9.216	0.025486	12.331	37950
	1	HLA-E*01:01	GLDELFVQV	GLDELFVQV	0	0	0	0	0	GLDELFVQV	PEPLIST	0.030503	1.406	0.041429	5.109	31937.2	<=	WB		1	HLA-E*01:03	GLDELFVQV	GLDELFVQV	0	0	0	0	0	GLDELFVQV	PEPLIST	0.030503	1.406	0.041429	5.109	31937.2	<=	WB
	1	HLA-E*01:01	GLDRLNVTV	GLDRLNVTV	0	0	0	0	0	GLDRLNVTV	PEPLIST	0.018597	2.325	0.049696	3.5	29204.5				1	HLA-E*01:03	GLDRLNVTV	GLDRLNVTV	0	0	0	0	0	GLDRLNVTV	PEPLIST	0.018597	2.325	0.049696	3.5	29204.5
	1	HLA-E*01:01	GLGPPGRSV	GLGPPGRSV	0	0	0	0	0	GLGPPGRSV	PEPLIST	0.014936	2.833	0.032867	8.009	35037.2				1	HLA-E*01:03	GLGPPGRSV	GLGPPGRSV	0	0	0	0	0	GLGPPGRSV	PEPLIST	0.014936	2.833	0.032867	8.009	35037.2
	1	HLA-E*01:01	GLIDRQVTV	GLIDRQVTV	0	0	0	0	0	GLIDRQVTV	PEPLIST	0.047572	0.852	0.060947	2.184	25857.2	<=	WB		1	HLA-E*01:03	GLIDRQVTV	GLIDRQVTV	0	0	0	0	0	GLIDRQVTV	PEPLIST	0.047572	0.852	0.060947	2.184	25857.2	<=	WB
	1	HLA-E*01:01	GLIEILKKV	GLIEILKKV	0	0	0	0	0	GLIEILKKV	PEPLIST	0.005976	5.648	0.020336	17.155	40124.7				1	HLA-E*01:03	GLIEILKKV	GLIEILKKV	0	0	0	0	0	GLIEILKKV	PEPLIST	0.005976	5.648	0.020336	17.155	40124.7
	1	HLA-E*01:01	GLIEKNIEL	GLIEKNIEL	0	0	0	0	0	GLIEKNIEL	PEPLIST	0.151911	0.143	0.101366	0.519	16697.6	<=	SB		1	HLA-E*01:03	GLIEKNIEL	GLIEKNIEL	0	0	0	0	0	GLIEKNIEL	PEPLIST	0.151911	0.143	0.101366	0.519	16697.6	<=	SB
	1	HLA-E*01:01	GLMADPMKV	GLMADPMKV	0	0	0	0	0	GLMADPMKV	PEPLIST	0.006385	5.403	0.032556	8.151	35155.3				1	HLA-E*01:03	GLMADPMKV	GLMADPMKV	0	0	0	0	0	GLMADPMKV	PEPLIST	0.006385	5.403	0.032556	8.151	35155.3
	1	HLA-E*01:01	GLMEDLLKL	GLMEDLLKL	0	0	0	0	0	GLMEDLLKL	PEPLIST	0.046373	0.877	0.058596	2.396	26523.4	<=	WB		1	HLA-E*01:03	GLMEDLLKL	GLMEDLLKL	0	0	0	0	0	GLMEDLLKL	PEPLIST	0.046373	0.877	0.058596	2.396	26523.4	<=	WB
	1	HLA-E*01:01	GLQEGTHEL	GLQEGTHEL	0	0	0	0	0	GLQEGTHEL	PEPLIST	0.096403	0.301	0.0713	1.447	23117.1	<=	SB		1	HLA-E*01:03	GLQEGTHEL	GLQEGTHEL	0	0	0	0	0	GLQEGTHEL	PEPLIST	0.096403	0.301	0.0713	1.447	23117.1	<=	SB
	1	HLA-E*01:01	GLVDQLVKA	GLVDQLVKA	0	0	0	0	0	GLVDQLVKA	PEPLIST	0.000211	26.583	0.008955	40.656	45382.7				1	HLA-E*01:03	GLVDQLVKA	GLVDQLVKA	0	0	0	0	0	GLVDQLVKA	PEPLIST	0.000211	26.583	0.008955	40.656	45382.7
	1	HLA-E*01:01	GMLDGLVNV	GMLDGLVNV	0	0	0	0	0	GMLDGLVNV	PEPLIST	0.008775	4.347	0.035825	6.852	33933.6				1	HLA-E*01:03	GMLDGLVNV	GMLDGLVNV	0	0	0	0	0	GMLDGLVNV	PEPLIST	0.008775	4.347	0.035825	6.852	33933.6
	1	HLA-E*01:01	GMMSTVTEV	GMMSTVTEV	0	0	0	0	0	GMMSTVTEV	PEPLIST	0.023889	1.803	0.059787	2.289	26183.8	<=	WB		1	HLA-E*01:03	GMMSTVTEV	GMMSTVTEV	0	0	0	0	0	GMMSTVTEV	PEPLIST	0.023889	1.803	0.059787	2.289	26183.8	<=	WB
	1	HLA-E*01:01	GMPDFLEKL	GMPDFLEKL	0	0	0	0	0	GMPDFLEKL	PEPLIST	0.222062	0.062	0.152966	0.124	9554.04	<=	SB		1	HLA-E*01:03	GMPDFLEKL	GMPDFLEKL	0	0	0	0	0	GMPDFLEKL	PEPLIST	0.222062	0.062	0.152966	0.124	9554.04	<=	SB
	1	HLA-E*01:01	GMWGGAMLGV	GMWGGAMLV	0	8	1	0	0	GMWGGAMLGV	PEPLIST	0.000155	29.312	0.020681	16.766	39975.2				1	HLA-E*01:03	GMWGGAMLGV	GMWGGAMLV	0	8	1	0	0	GMWGGAMLGV	PEPLIST	0.000155	29.312	0.020681	16.766	39975.2
	1	HLA-E*01:01	GQLLLLSEV	GQLLLLSEV	0	0	0	0	0	GQLLLLSEV	PEPLIST	0.004365	6.904	0.026519	11.581	37528.2				1	HLA-E*01:03	GQLLLLSEV	GQLLLLSEV	0	0	0	0	0	GQLLLLSEV	PEPLIST	0.004365	6.904	0.026519	11.581	37528.2
	1	HLA-E*01:01	GVGPVPARA	GVGPVPARA	0	0	0	0	0	GVGPVPARA	PEPLIST	0.001203	13.827	0.009938	37.077	44902.6				1	HLA-E*01:03	GVGPVPARA	GVGPVPARA	0	0	0	0	0	GVGPVPARA	PEPLIST	0.001203	13.827	0.009938	37.077	44902.6
	1	HLA-E*01:01	GVLPNIQAV	GVLPNIQAV	0	0	0	0	0	GVLPNIQAV	PEPLIST	0.009381	4.131	0.028738	10.157	36637.9				1	HLA-E*01:03	GVLPNIQAV	GVLPNIQAV	0	0	0	0	0	GVLPNIQAV	PEPLIST	0.009381	4.131	0.028738	10.157	36637.9
	1	HLA-E*01:01	GVYDGEEHSV	GVYDGEHSV	0	5	1	0	0	GVYDGEEHSV	PEPLIST	0.000604	18.39	0.01411	26.423	42920.8				1	HLA-E*01:03	GVYDGEEHSV	GVYDGEHSV	0	5	1	0	0	GVYDGEEHSV	PEPLIST	0.000604	18.39	0.01411	26.423	42920.8
	1	HLA-E*01:01	GVYGDVHRV	GVYGDVHRV	0	0	0	0	0	GVYGDVHRV	PEPLIST	0.007702	4.773	0.025921	12.002	37771.8				1	HLA-E*01:03	GVYGDVHRV	GVYGDVHRV	0	0	0	0	0	GVYGDVHRV	PEPLIST	0.007702	4.773	0.025921	12.002	37771.8
	1	HLA-E*01:01	GVYGDVQRV	GVYGDVQRV	0	0	0	0	0	GVYGDVQRV	PEPLIST	0.003773	7.548	0.02137	16	39678.3				1	HLA-E*01:03	GVYGDVQRV	GVYGDVQRV	0	0	0	0	0	GVYGDVQRV	PEPLIST	0.003773	7.548	0.02137	16	39678.3
	1	HLA-E*01:01	GVYGGSVHEA	GVYGGSHEA	0	6	1	0	0	GVYGGSVHEA	PEPLIST	0.000107	32.833	0.008137	44.201	45786.2				1	HLA-E*01:03	GVYGGSVHEA	GVYGGSHEA	0	6	1	0	0	GVYGGSVHEA	PEPLIST	0.000107	32.833	0.008137	44.201	45786.2
	1	HLA-E*01:01	HIIENIVAV	HIIENIVAV	0	0	0	0	0	HIIENIVAV	PEPLIST	0.021636	1.988	0.042103	4.94	31705.1	<=	WB		1	HLA-E*01:03	HIIENIVAV	HIIENIVAV	0	0	0	0	0	HIIENIVAV	PEPLIST	0.021636	1.988	0.042103	4.94	31705.1	<=	WB
	1	HLA-E*01:01	HLDDLKGTFA	HLDDLKTFA	0	6	1	0	0	HLDDLKGTFA	PEPLIST	0.000202	26.958	0.015008	24.672	42505.8				1	HLA-E*01:03	HLDDLKGTFA	HLDDLKTFA	0	6	1	0	0	HLDDLKGTFA	PEPLIST	0.000202	26.958	0.015008	24.672	42505.8
	1	HLA-E*01:01	HLIDFMSEI	HLIDFMSEI	0	0	0	0	0	HLIDFMSEI	PEPLIST	0.020898	2.066	0.057626	2.483	26803.2				1	HLA-E*01:03	HLIDFMSEI	HLIDFMSEI	0	0	0	0	0	HLIDFMSEI	PEPLIST	0.020898	2.066	0.057626	2.483	26803.2
	1	HLA-E*01:01	HLLGDPMANV	HLLDPMANV	0	3	1	0	0	HLLGDPMANV	PEPLIST	0.000569	18.817	0.018772	19.052	40809.5				1	HLA-E*01:03	HLLGDPMANV	HLLDPMANV	0	3	1	0	0	HLLGDPMANV	PEPLIST	0.000569	18.817	0.018772	19.052	40809.5
	1	HLA-E*01:01	HLLNESPML	HLLNESPML	0	0	0	0	0	HLLNESPML	PEPLIST	0.050238	0.797	0.075271	1.254	22144.9	<=	WB		1	HLA-E*01:03	HLLNESPML	HLLNESPML	0	0	0	0	0	HLLNESPML	PEPLIST	0.050238	0.797	0.075271	1.254	22144.9	<=	WB
	1	HLA-E*01:01	HLSNIPPSV	HLSNIPPSV	0	0	0	0	0	HLSNIPPSV	PEPLIST	0.03808	1.111	0.055443	2.732	27443.8	<=	WB		1	HLA-E*01:03	HLSNIPPSV	HLSNIPPSV	0	0	0	0	0	HLSNIPPSV	PEPLIST	0.03808	1.111	0.055443	2.732	27443.8	<=	WB
	1	HLA-E*01:01	HPPPPPPPP	HPPPPPPPP	0	0	0	0	0	HPPPPPPPP	PEPLIST	0.004388	6.884	0.011787	31.698	44013.2				1	HLA-E*01:03	HPPPPPPPP	HPPPPPPPP	0	0	0	0	0	HPPPPPPPP	PEPLIST	0.004388	6.884	0.011787	31.698	44013.2
	1	HLA-E*01:01	HYVTGPAEA	HYVTGPAEA	0	0	0	0	0	HYVTGPAEA	PEPLIST	0.000524	19.417	0.011513	32.434	44143.9				1	HLA-E*01:03	HYVTGPAEA	HYVTGPAEA	0	0	0	0	0	HYVTGPAEA	PEPLIST	0.000524	19.417	0.011513	32.434	44143.9
	1	HLA-E*01:01	IDAIRIPVL	IDAIRIPVL	0	0	0	0	0	IDAIRIPVL	PEPLIST	0.048519	0.832	0.081072	1.028	20797.7	<=	WB		1	HLA-E*01:03	IDAIRIPVL	IDAIRIPVL	0	0	0	0	0	IDAIRIPVL	PEPLIST	0.048519	0.832	0.081072	1.028	20797.7	<=	WB
	1	HLA-E*01:01	ILDAGGHNV	ILDAGGHNV	0	0	0	0	0	ILDAGGHNV	PEPLIST	0.029614	1.448	0.086837	0.849	19540	<=	WB		1	HLA-E*01:03	ILDAGGHNV	ILDAGGHNV	0	0	0	0	0	ILDAGGHNV	PEPLIST	0.029614	1.448	0.086837	0.849	19540	<=	WB
	1	HLA-E*01:01	ILDESDHITM	ILDESHITM	0	5	1	0	0	ILDESDHITM	PEPLIST	0.041326	1.011	0.089417	0.781	19002.1	<=	WB		1	HLA-E*01:03	ILDESDHITM	ILDESHITM	0	5	1	0	0	ILDESDHITM	PEPLIST	0.041326	1.011	0.089417	0.781	19002.1	<=	WB
	1	HLA-E*01:01	ILDESHERV	ILDESHERV	0	0	0	0	0	ILDESHERV	PEPLIST	0.076477	0.464	0.095859	0.616	17722.8	<=	SB		1	HLA-E*01:03	ILDESHERV	ILDESHERV	0	0	0	0	0	ILDESHERV	PEPLIST	0.076477	0.464	0.095859	0.616	17722.8	<=	SB
	1	HLA-E*01:01	ILDPHVVLL	ILDPHVVLL	0	0	0	0	0	ILDPHVVLL	PEPLIST	0.684379	0.006	0.373641	0.009	877.49	<=	SB		1	HLA-E*01:03	ILDPHVVLL	ILDPHVVLL	0	0	0	0	0	ILDPHVVLL	PEPLIST	0.684379	0.006	0.373641	0.009	877.49	<=	SB
	1	HLA-E*01:01	ILDQKINEV	ILDQKINEV	0	0	0	0	0	ILDQKINEV	PEPLIST	0.121034	0.211	0.093006	0.682	18278.4	<=	SB		1	HLA-E*01:03	ILDQKINEV	ILDQKINEV	0	0	0	0	0	ILDQKINEV	PEPLIST	0.121034	0.211	0.093006	0.682	18278.4	<=	SB
	1	HLA-E*01:01	ILENPPEEMKL	ILPPEEMKL	0	2	2	0	0	ILENPPEEMKL	PEPLIST	0.062993	0.594	0.060017	2.268	26118.7	<=	WB		1	HLA-E*01:03	ILENPPEEMKL	ILPPEEMKL	0	2	2	0	0	ILENPPEEMKL	PEPLIST	0.062993	0.594	0.060017	2.268	26118.7	<=	WB
	1	HLA-E*01:01	ILLDNDHYAM	ILLDNDHYM	0	8	1	0	0	ILLDNDHYAM	PEPLIST	0.005057	6.321	0.0426	4.831	31535.1				1	HLA-E*01:03	ILLDNDHYAM	ILLDNDHYM	0	8	1	0	0	ILLDNDHYAM	PEPLIST	0.005057	6.321	0.0426	4.831	31535.1
	1	HLA-E*01:01	ILTDITKGV	ILTDITKGV	0	0	0	0	0	ILTDITKGV	PEPLIST	0.005761	5.793	0.033788	7.626	34689.7				1	HLA-E*01:03	ILTDITKGV	ILTDITKGV	0	0	0	0	0	ILTDITKGV	PEPLIST	0.005761	5.793	0.033788	7.626	34689.7
	1	HLA-E*01:01	IMLEALERV	IMLEALERV	0	0	0	0	0	IMLEALERV	PEPLIST	0.025621	1.665	0.071302	1.447	23116.6	<=	WB		1	HLA-E*01:03	IMLEALERV	IMLEALERV	0	0	0	0	0	IMLEALERV	PEPLIST	0.025621	1.665	0.071302	1.447	23116.6	<=	WB
	1	HLA-E*01:01	IQVTKVTQV	IQVTKVTQV	0	0	0	0	0	IQVTKVTQV	PEPLIST	0.112932	0.238	0.072091	1.405	22920.1	<=	SB		1	HLA-E*01:03	IQVTKVTQV	IQVTKVTQV	0	0	0	0	0	IQVTKVTQV	PEPLIST	0.112932	0.238	0.072091	1.405	22920.1	<=	SB
	1	HLA-E*01:01	ISEENFRVM	ISEENFRVM	0	0	0	0	0	ISEENFRVM	PEPLIST	0.035184	1.224	0.085401	0.886	19846	<=	WB		1	HLA-E*01:03	ISEENFRVM	ISEENFRVM	0	0	0	0	0	ISEENFRVM	PEPLIST	0.035184	1.224	0.085401	0.886	19846	<=	WB
	1	HLA-E*01:01	ISIEGNKMPL	ISIEGKMPL	0	5	1	0	0	ISIEGNKMPL	PEPLIST	0.008582	4.415	0.06652	1.753	24344.2				1	HLA-E*01:03	ISIEGNKMPL	ISIEGKMPL	0	5	1	0	0	ISIEGNKMPL	PEPLIST	0.008582	4.415	0.06652	1.753	24344.2
	1	HLA-E*01:01	ITQLNQGVTI	IQLNQGVTI	0	1	1	0	0	ITQLNQGVTI	PEPLIST	0.008036	4.631	0.058824	2.375	26458				1	HLA-E*01:03	ITQLNQGVTI	IQLNQGVTI	0	1	1	0	0	ITQLNQGVTI	PEPLIST	0.008036	4.631	0.058824	2.375	26458
	1	HLA-E*01:01	IVDPFQILV	IVDPFQILV	0	0	0	0	0	IVDPFQILV	PEPLIST	0.13102	0.184	0.127146	0.232	12633.2	<=	SB		1	HLA-E*01:03	IVDPFQILV	IVDPFQILV	0	0	0	0	0	IVDPFQILV	PEPLIST	0.13102	0.184	0.127146	0.232	12633.2	<=	SB
	1	HLA-E*01:01	IVPPGGHSV	IVPPGGHSV	0	0	0	0	0	IVPPGGHSV	PEPLIST	0.226508	0.059	0.13959	0.171	11041.8	<=	SB		1	HLA-E*01:03	IVPPGGHSV	IVPPGGHSV	0	0	0	0	0	IVPPGGHSV	PEPLIST	0.226508	0.059	0.13959	0.171	11041.8	<=	SB
	1	HLA-E*01:01	KAFTKPEEA	KAFTKPEEA	0	0	0	0	0	KAFTKPEEA	PEPLIST	0.007345	4.925	0.023728	13.712	38678.8				1	HLA-E*01:03	KAFTKPEEA	KAFTKPEEA	0	0	0	0	0	KAFTKPEEA	PEPLIST	0.007345	4.925	0.023728	13.712	38678.8
	1	HLA-E*01:01	KAHLGTAL	KAH-LGTAL	0	0	0	3	1	KAHLGTAL	PEPLIST	0.00941	4.12	0.037831	6.149	33205				1	HLA-E*01:03	KAHLGTAL	KAH-LGTAL	0	0	0	3	1	KAHLGTAL	PEPLIST	0.00941	4.12	0.037831	6.149	33205
	1	HLA-E*01:01	KAPPAPLAA	KAPPAPLAA	0	0	0	0	0	KAPPAPLAA	PEPLIST	0.03739	1.138	0.059339	2.329	26311	<=	WB		1	HLA-E*01:03	KAPPAPLAA	KAPPAPLAA	0	0	0	0	0	KAPPAPLAA	PEPLIST	0.03739	1.138	0.059339	2.329	26311	<=	WB
	1	HLA-E*01:01	KAWENSPNV	KAWENSPNV	0	0	0	0	0	KAWENSPNV	PEPLIST	0.045924	0.886	0.070808	1.473	23240.5	<=	WB		1	HLA-E*01:03	KAWENSPNV	KAWENSPNV	0	0	0	0	0	KAWENSPNV	PEPLIST	0.045924	0.886	0.070808	1.473	23240.5	<=	WB
	1	HLA-E*01:01	KDLEVYLQKL	KDLEVLQKL	0	5	1	0	0	KDLEVYLQKL	PEPLIST	0.003611	7.74	0.026581	11.537	37503.1				1	HLA-E*01:03	KDLEVYLQKL	KDLEVLQKL	0	5	1	0	0	KDLEVYLQKL	PEPLIST	0.003611	7.74	0.026581	11.537	37503.1
	1	HLA-E*01:01	KIADFGWSV	KIADFGWSV	0	0	0	0	0	KIADFGWSV	PEPLIST	0.017199	2.482	0.065471	1.829	24622				1	HLA-E*01:03	KIADFGWSV	KIADFGWSV	0	0	0	0	0	KIADFGWSV	PEPLIST	0.017199	2.482	0.065471	1.829	24622
	1	HLA-E*01:01	KIAPNTPQL	KIAPNTPQL	0	0	0	0	0	KIAPNTPQL	PEPLIST	0.38906	0.016	0.170293	0.085	7920.79	<=	SB		1	HLA-E*01:03	KIAPNTPQL	KIAPNTPQL	0	0	0	0	0	KIAPNTPQL	PEPLIST	0.38906	0.016	0.170293	0.085	7920.79	<=	SB
	1	HLA-E*01:01	KIAQFLESV	KIAQFLESV	0	0	0	0	0	KIAQFLESV	PEPLIST	0.016169	2.638	0.055498	2.726	27427.5				1	HLA-E*01:03	KIAQFLESV	KIAQFLESV	0	0	0	0	0	KIAQFLESV	PEPLIST	0.016169	2.638	0.055498	2.726	27427.5
	1	HLA-E*01:01	KIDPTVTMM	KIDPTVTMM	0	0	0	0	0	KIDPTVTMM	PEPLIST	0.176233	0.104	0.097736	0.58	17366.5	<=	SB		1	HLA-E*01:03	KIDPTVTMM	KIDPTVTMM	0	0	0	0	0	KIDPTVTMM	PEPLIST	0.176233	0.104	0.097736	0.58	17366.5	<=	SB
	1	HLA-E*01:01	KIFEMGPVFTL	KIFEPVFTL	0	4	2	0	0	KIFEMGPVFTL	PEPLIST	0.027099	1.576	0.054194	2.877	27817.2	<=	WB		1	HLA-E*01:03	KIFEMGPVFTL	KIFEPVFTL	0	4	2	0	0	KIFEMGPVFTL	PEPLIST	0.027099	1.576	0.054194	2.877	27817.2	<=	WB
	1	HLA-E*01:01	KIGDFGLATV	KGDFGLATV	0	1	1	0	0	KIGDFGLATV	PEPLIST	0.001309	13.302	0.036625	6.575	33641.1				1	HLA-E*01:03	KIGDFGLATV	KGDFGLATV	0	1	1	0	0	KIGDFGLATV	PEPLIST	0.001309	13.302	0.036625	6.575	33641.1
	1	HLA-E*01:01	KIGEGTYGV	KIGEGTYGV	0	0	0	0	0	KIGEGTYGV	PEPLIST	0.004171	7.093	0.032604	8.129	35137				1	HLA-E*01:03	KIGEGTYGV	KIGEGTYGV	0	0	0	0	0	KIGEGTYGV	PEPLIST	0.004171	7.093	0.032604	8.129	35137
	1	HLA-E*01:01	KIIDEDGLLNL	KIIDGLLNL	0	3	2	0	0	KIIDEDGLLNL	PEPLIST	0.00347	7.907	0.027036	11.216	37318.9				1	HLA-E*01:03	KIIDEDGLLNL	KIIDGLLNL	0	3	2	0	0	KIIDEDGLLNL	PEPLIST	0.00347	7.907	0.027036	11.216	37318.9
	1	HLA-E*01:01	KIIDIQEKV	KIIDIQEKV	0	0	0	0	0	KIIDIQEKV	PEPLIST	0.024888	1.716	0.038066	6.066	33120.7	<=	WB		1	HLA-E*01:03	KIIDIQEKV	KIIDIQEKV	0	0	0	0	0	KIIDIQEKV	PEPLIST	0.024888	1.716	0.038066	6.066	33120.7	<=	WB
	1	HLA-E*01:01	KILPDLNTV	KILPDLNTV	0	0	0	0	0	KILPDLNTV	PEPLIST	0.016098	2.649	0.044308	4.461	30957.7				1	HLA-E*01:03	KILPDLNTV	KILPDLNTV	0	0	0	0	0	KILPDLNTV	PEPLIST	0.016098	2.649	0.044308	4.461	30957.7
	1	HLA-E*01:01	KILPTLEAV	KILPTLEAV	0	0	0	0	0	KILPTLEAV	PEPLIST	0.011309	3.552	0.040822	5.275	32147.6				1	HLA-E*01:03	KILPTLEAV	KILPTLEAV	0	0	0	0	0	KILPTLEAV	PEPLIST	0.011309	3.552	0.040822	5.275	32147.6
	1	HLA-E*01:01	KILQELPSV	KILQELPSV	0	0	0	0	0	KILQELPSV	PEPLIST	0.021891	1.967	0.049315	3.562	29325.2	<=	WB		1	HLA-E*01:03	KILQELPSV	KILQELPSV	0	0	0	0	0	KILQELPSV	PEPLIST	0.021891	1.967	0.049315	3.562	29325.2	<=	WB
	1	HLA-E*01:01	KILSELFTV	KILSELFTV	0	0	0	0	0	KILSELFTV	PEPLIST	0.010405	3.811	0.046127	4.103	30354.3				1	HLA-E*01:03	KILSELFTV	KILSELFTV	0	0	0	0	0	KILSELFTV	PEPLIST	0.010405	3.811	0.046127	4.103	30354.3
	1	HLA-E*01:01	KIQEILTQV	KIQEILTQV	0	0	0	0	0	KIQEILTQV	PEPLIST	0.023651	1.823	0.042165	4.927	31683.9	<=	WB		1	HLA-E*01:03	KIQEILTQV	KIQEILTQV	0	0	0	0	0	KIQEILTQV	PEPLIST	0.023651	1.823	0.042165	4.927	31683.9	<=	WB
	1	HLA-E*01:01	KISDFGLATV	KISDFGLTV	0	7	1	0	0	KISDFGLATV	PEPLIST	0.002408	9.74	0.047447	3.869	29923.9				1	HLA-E*01:03	KISDFGLATV	KISDFGLTV	0	7	1	0	0	KISDFGLATV	PEPLIST	0.002408	9.74	0.047447	3.869	29923.9
	1	HLA-E*01:01	KIVDFSYSV	KIVDFSYSV	0	0	0	0	0	KIVDFSYSV	PEPLIST	0.018898	2.291	0.050566	3.374	28930.9				1	HLA-E*01:03	KIVDFSYSV	KIVDFSYSV	0	0	0	0	0	KIVDFSYSV	PEPLIST	0.018898	2.291	0.050566	3.374	28930.9
	1	HLA-E*01:01	KIYEGQVEV	KIYEGQVEV	0	0	0	0	0	KIYEGQVEV	PEPLIST	0.072485	0.502	0.075969	1.222	21978.3	<=	WB		1	HLA-E*01:03	KIYEGQVEV	KIYEGQVEV	0	0	0	0	0	KIYEGQVEV	PEPLIST	0.072485	0.502	0.075969	1.222	21978.3	<=	WB
	1	HLA-E*01:01	KLDDTYIKA	KLDDTYIKA	0	0	0	0	0	KLDDTYIKA	PEPLIST	0.007395	4.904	0.028609	10.235	36689.1				1	HLA-E*01:03	KLDDTYIKA	KLDDTYIKA	0	0	0	0	0	KLDDTYIKA	PEPLIST	0.007395	4.904	0.028609	10.235	36689.1
	1	HLA-E*01:01	KLDEDVKMI	KLDEDVKMI	0	0	0	0	0	KLDEDVKMI	PEPLIST	0.043829	0.94	0.061004	2.179	25841.3	<=	WB		1	HLA-E*01:03	KLDEDVKMI	KLDEDVKMI	0	0	0	0	0	KLDEDVKMI	PEPLIST	0.043829	0.94	0.061004	2.179	25841.3	<=	WB
	1	HLA-E*01:01	KLDQDLNEV	KLDQDLNEV	0	0	0	0	0	KLDQDLNEV	PEPLIST	0.013099	3.164	0.046195	4.089	30332				1	HLA-E*01:03	KLDQDLNEV	KLDQDLNEV	0	0	0	0	0	KLDQDLNEV	PEPLIST	0.013099	3.164	0.046195	4.089	30332
	1	HLA-E*01:01	KLDSTPLKA	KLDSTPLKA	0	0	0	0	0	KLDSTPLKA	PEPLIST	0.003173	8.343	0.022081	15.266	39374.2				1	HLA-E*01:03	KLDSTPLKA	KLDSTPLKA	0	0	0	0	0	KLDSTPLKA	PEPLIST	0.003173	8.343	0.022081	15.266	39374.2
	1	HLA-E*01:01	KLDVGNAEV	KLDVGNAEV	0	0	0	0	0	KLDVGNAEV	PEPLIST	0.012847	3.216	0.069077	1.582	23679.9				1	HLA-E*01:03	KLDVGNAEV	KLDVGNAEV	0	0	0	0	0	KLDVGNAEV	PEPLIST	0.012847	3.216	0.069077	1.582	23679.9
	1	HLA-E*01:01	KLEEIIHQI	KLEEIIHQI	0	0	0	0	0	KLEEIIHQI	PEPLIST	0.136331	0.172	0.079732	1.075	21101.4	<=	SB		1	HLA-E*01:03	KLEEIIHQI	KLEEIIHQI	0	0	0	0	0	KLEEIIHQI	PEPLIST	0.136331	0.172	0.079732	1.075	21101.4	<=	SB
	1	HLA-E*01:01	KLFADAVQEL	KLFDAVQEL	0	3	1	0	0	KLFADAVQEL	PEPLIST	0.044134	0.931	0.071944	1.413	22956.6	<=	WB		1	HLA-E*01:03	KLFADAVQEL	KLFDAVQEL	0	3	1	0	0	KLFADAVQEL	PEPLIST	0.044134	0.931	0.071944	1.413	22956.6	<=	WB
	1	HLA-E*01:01	KLFNEFIQL	KLFNEFIQL	0	0	0	0	0	KLFNEFIQL	PEPLIST	0.192337	0.082	0.126481	0.237	12724.5	<=	SB		1	HLA-E*01:03	KLFNEFIQL	KLFNEFIQL	0	0	0	0	0	KLFNEFIQL	PEPLIST	0.192337	0.082	0.126481	0.237	12724.5	<=	SB
	1	HLA-E*01:01	KLFPGFEIETV	KLFPEIETV	0	4	2	0	0	KLFPGFEIETV	PEPLIST	0.008006	4.644	0.029273	9.838	36426.5				1	HLA-E*01:03	KLFPGFEIETV	KLFPEIETV	0	4	2	0	0	KLFPGFEIETV	PEPLIST	0.008006	4.644	0.029273	9.838	36426.5
	1	HLA-E*01:01	KLGDIMGV	KLGD-IMGV	0	0	0	4	1	KLGDIMGV	PEPLIST	0.000237	25.586	0.013884	26.892	43025.8				1	HLA-E*01:03	KLGDIMGV	KLGD-IMGV	0	0	0	4	1	KLGDIMGV	PEPLIST	0.000237	25.586	0.013884	26.892	43025.8
	1	HLA-E*01:01	KLGGVVSI	KLG-GVVSI	0	0	0	3	1	KLGGVVSI	PEPLIST	0.002893	8.8	0.02219	15.154	39327.8				1	HLA-E*01:03	KLGGVVSI	KLG-GVVSI	0	0	0	3	1	KLGGVVSI	PEPLIST	0.002893	8.8	0.02219	15.154	39327.8
	1	HLA-E*01:01	KLGPEGELL	KLGPEGELL	0	0	0	0	0	KLGPEGELL	PEPLIST	0.070071	0.525	0.098904	0.56	17148.4	<=	WB		1	HLA-E*01:03	KLGPEGELL	KLGPEGELL	0	0	0	0	0	KLGPEGELL	PEPLIST	0.070071	0.525	0.098904	0.56	17148.4	<=	WB
	1	HLA-E*01:01	KLGSVPVTV	KLGSVPVTV	0	0	0	0	0	KLGSVPVTV	PEPLIST	0.059704	0.637	0.068257	1.636	23890.9	<=	WB		1	HLA-E*01:03	KLGSVPVTV	KLGSVPVTV	0	0	0	0	0	KLGSVPVTV	PEPLIST	0.059704	0.637	0.068257	1.636	23890.9	<=	WB
	1	HLA-E*01:01	KLIANNTTV	KLIANNTTV	0	0	0	0	0	KLIANNTTV	PEPLIST	0.041877	0.995	0.08322	0.955	20319.9	<=	WB		1	HLA-E*01:03	KLIANNTTV	KLIANNTTV	0	0	0	0	0	KLIANNTTV	PEPLIST	0.041877	0.995	0.08322	0.955	20319.9	<=	WB
	1	HLA-E*01:01	KLIDFGSGALL	KLIDSGALL	0	4	2	0	0	KLIDFGSGALL	PEPLIST	0.015207	2.79	0.061718	2.115	25642.4				1	HLA-E*01:03	KLIDFGSGALL	KLIDSGALL	0	4	2	0	0	KLIDFGSGALL	PEPLIST	0.015207	2.79	0.061718	2.115	25642.4
	1	HLA-E*01:01	KLLDTMVDTFL	KLLDTDTFL	0	5	2	0	0	KLLDTMVDTFL	PEPLIST	0.005702	5.832	0.03379	7.625	34689				1	HLA-E*01:03	KLLDTMVDTFL	KLLDTDTFL	0	5	2	0	0	KLLDTMVDTFL	PEPLIST	0.005702	5.832	0.03379	7.625	34689
	1	HLA-E*01:01	KLLEGEESRISL	KLLEGRISL	0	5	3	0	0	KLLEGEESRISL	PEPLIST	0.004062	7.218	0.031876	8.463	35414.9				1	HLA-E*01:03	KLLEGEESRISL	KLLEGRISL	0	5	3	0	0	KLLEGEESRISL	PEPLIST	0.004062	7.218	0.031876	8.463	35414.9
	1	HLA-E*01:01	KLLEPVLLL	KLLEPVLLL	0	0	0	0	0	KLLEPVLLL	PEPLIST	0.315808	0.025	0.164963	0.096	8391	<=	SB		1	HLA-E*01:03	KLLEPVLLL	KLLEPVLLL	0	0	0	0	0	KLLEPVLLL	PEPLIST	0.315808	0.025	0.164963	0.096	8391	<=	SB
	1	HLA-E*01:01	KLLEYIEEI	KLLEYIEEI	0	0	0	0	0	KLLEYIEEI	PEPLIST	0.07291	0.498	0.096841	0.595	17535.5	<=	SB		1	HLA-E*01:03	KLLEYIEEI	KLLEYIEEI	0	0	0	0	0	KLLEYIEEI	PEPLIST	0.07291	0.498	0.096841	0.595	17535.5	<=	SB
	1	HLA-E*01:01	KLMDLDVEQL	KLMDLDVQL	0	7	1	0	0	KLMDLDVEQL	PEPLIST	0.029138	1.471	0.06149	2.135	25705.8	<=	WB		1	HLA-E*01:03	KLMDLDVEQL	KLMDLDVQL	0	7	1	0	0	KLMDLDVEQL	PEPLIST	0.029138	1.471	0.06149	2.135	25705.8	<=	WB
	1	HLA-E*01:01	KLMEEIREL	KLMEEIREL	0	0	0	0	0	KLMEEIREL	PEPLIST	0.270059	0.039	0.149844	0.134	9882.29	<=	SB		1	HLA-E*01:03	KLMEEIREL	KLMEEIREL	0	0	0	0	0	KLMEEIREL	PEPLIST	0.270059	0.039	0.149844	0.134	9882.29	<=	SB
	1	HLA-E*01:01	KLMQQQQEV	KLMQQQQEV	0	0	0	0	0	KLMQQQQEV	PEPLIST	0.054404	0.715	0.066633	1.745	24314.4	<=	WB		1	HLA-E*01:03	KLMQQQQEV	KLMQQQQEV	0	0	0	0	0	KLMQQQQEV	PEPLIST	0.054404	0.715	0.066633	1.745	24314.4	<=	WB
	1	HLA-E*01:01	KLMQVVPQET	KLMQVPQET	0	4	1	0	0	KLMQVVPQET	PEPLIST	0.000108	32.75	0.009576	38.345	45078.8				1	HLA-E*01:03	KLMQVVPQET	KLMQVPQET	0	4	1	0	0	KLMQVVPQET	PEPLIST	0.000108	32.75	0.009576	38.345	45078.8
	1	HLA-E*01:01	KLNATNIEL	KLNATNIEL	0	0	0	0	0	KLNATNIEL	PEPLIST	0.129627	0.187	0.131666	0.2	12030.3	<=	SB		1	HLA-E*01:03	KLNATNIEL	KLNATNIEL	0	0	0	0	0	KLNATNIEL	PEPLIST	0.129627	0.187	0.131666	0.2	12030.3	<=	SB
	1	HLA-E*01:01	KLNEMSYEL	KLNEMSYEL	0	0	0	0	0	KLNEMSYEL	PEPLIST	0.212567	0.067	0.164491	0.097	8433.96	<=	SB		1	HLA-E*01:03	KLNEMSYEL	KLNEMSYEL	0	0	0	0	0	KLNEMSYEL	PEPLIST	0.212567	0.067	0.164491	0.097	8433.96	<=	SB
	1	HLA-E*01:01	KLNPQQFEV	KLNPQQFEV	0	0	0	0	0	KLNPQQFEV	PEPLIST	0.091529	0.338	0.087025	0.844	19500.3	<=	SB		1	HLA-E*01:03	KLNPQQFEV	KLNPQQFEV	0	0	0	0	0	KLNPQQFEV	PEPLIST	0.091529	0.338	0.087025	0.844	19500.3	<=	SB
	1	HLA-E*01:01	KLQEFLQTL	KLQEFLQTL	0	0	0	0	0	KLQEFLQTL	PEPLIST	0.288779	0.032	0.16706	0.091	8202.76	<=	SB		1	HLA-E*01:03	KLQEFLQTL	KLQEFLQTL	0	0	0	0	0	KLQEFLQTL	PEPLIST	0.288779	0.032	0.16706	0.091	8202.76	<=	SB
	1	HLA-E*01:01	KLSEMSVTL	KLSEMSVTL	0	0	0	0	0	KLSEMSVTL	PEPLIST	0.385211	0.016	0.231792	0.028	4071.8	<=	SB		1	HLA-E*01:03	KLSEMSVTL	KLSEMSVTL	0	0	0	0	0	KLSEMSVTL	PEPLIST	0.385211	0.016	0.231792	0.028	4071.8	<=	SB
	1	HLA-E*01:01	KLSEYEMSI	KLSEYEMSI	0	0	0	0	0	KLSEYEMSI	PEPLIST	0.070915	0.517	0.116087	0.326	14239	<=	WB		1	HLA-E*01:03	KLSEYEMSI	KLSEYEMSI	0	0	0	0	0	KLSEYEMSI	PEPLIST	0.070915	0.517	0.116087	0.326	14239	<=	WB
	1	HLA-E*01:01	KLSSLIILM	KLSSLIILM	0	0	0	0	0	KLSSLIILM	PEPLIST	0.063218	0.592	0.091673	0.716	18543.9	<=	WB		1	HLA-E*01:03	KLSSLIILM	KLSSLIILM	0	0	0	0	0	KLSSLIILM	PEPLIST	0.063218	0.592	0.091673	0.716	18543.9	<=	WB
	1	HLA-E*01:01	KLVEFDFLGA	KLVEFDFLA	0	8	1	0	0	KLVEFDFLGA	PEPLIST	4.7e-05	41.6	0.011927	31.321	43946.6				1	HLA-E*01:03	KLVEFDFLGA	KLVEFDFLA	0	8	1	0	0	KLVEFDFLGA	PEPLIST	4.7e-05	41.6	0.011927	31.321	43946.6
	1	HLA-E*01:01	KLWEAESKL	KLWEAESKL	0	0	0	0	0	KLWEAESKL	PEPLIST	0.078339	0.447	0.075247	1.255	22150.7	<=	SB		1	HLA-E*01:03	KLWEAESKL	KLWEAESKL	0	0	0	0	0	KLWEAESKL	PEPLIST	0.078339	0.447	0.075247	1.255	22150.7	<=	SB
	1	HLA-E*01:01	KLYQEVEIASV	KLYQEVESV	0	7	2	0	0	KLYQEVEIASV	PEPLIST	0.00136	13.05	0.0225	14.845	39196.1				1	HLA-E*01:03	KLYQEVEIASV	KLYQEVESV	0	7	2	0	0	KLYQEVEIASV	PEPLIST	0.00136	13.05	0.0225	14.845	39196.1
	1	HLA-E*01:01	KMADIEYRL	KMADIEYRL	0	0	0	0	0	KMADIEYRL	PEPLIST	0.207264	0.07	0.135058	0.188	11596.8	<=	SB		1	HLA-E*01:03	KMADIEYRL	KMADIEYRL	0	0	0	0	0	KMADIEYRL	PEPLIST	0.207264	0.07	0.135058	0.188	11596.8	<=	SB
	1	HLA-E*01:01	KMAEPFTKA	KMAEPFTKA	0	0	0	0	0	KMAEPFTKA	PEPLIST	0.023496	1.836	0.054817	2.805	27630.4	<=	WB		1	HLA-E*01:03	KMAEPFTKA	KMAEPFTKA	0	0	0	0	0	KMAEPFTKA	PEPLIST	0.023496	1.836	0.054817	2.805	27630.4	<=	WB
	1	HLA-E*01:01	KMANSVTDL	KMANSVTDL	0	0	0	0	0	KMANSVTDL	PEPLIST	0.070078	0.525	0.125407	0.244	12873.2	<=	WB		1	HLA-E*01:03	KMANSVTDL	KMANSVTDL	0	0	0	0	0	KMANSVTDL	PEPLIST	0.070078	0.525	0.125407	0.244	12873.2	<=	WB
	1	HLA-E*01:01	KMDASLGNLFA	KMDASGNLF	0	5	1	0	0	KMDASLGNLF	PEPLIST	0.000377	21.868	0.029159	9.905	36471.4				1	HLA-E*01:03	KMDASLGNLFA	KMDASGNLF	0	5	1	0	0	KMDASLGNLF	PEPLIST	0.000377	21.868	0.029159	9.905	36471.4
	1	HLA-E*01:01	KMDPIISRV	KMDPIISRV	0	0	0	0	0	KMDPIISRV	PEPLIST	0.239771	0.055	0.142095	0.161	10746.6	<=	SB		1	HLA-E*01:03	KMDPIISRV	KMDPIISRV	0	0	0	0	0	KMDPIISRV	PEPLIST	0.239771	0.055	0.142095	0.161	10746.6	<=	SB
	1	HLA-E*01:01	KMFESFIESV	KMFESIESV	0	5	1	0	0	KMFESFIESV	PEPLIST	0.01217	3.358	0.066751	1.737	24283.4				1	HLA-E*01:03	KMFESFIESV	KMFESIESV	0	5	1	0	0	KMFESFIESV	PEPLIST	0.01217	3.358	0.066751	1.737	24283.4
	1	HLA-E*01:01	KMIEDLQNEL	KMIELQNEL	0	4	1	0	0	KMIEDLQNEL	PEPLIST	0.033803	1.279	0.07232	1.393	22863.4	<=	WB		1	HLA-E*01:03	KMIEDLQNEL	KMIELQNEL	0	4	1	0	0	KMIEDLQNEL	PEPLIST	0.033803	1.279	0.07232	1.393	22863.4	<=	WB
	1	HLA-E*01:01	KMISMDIEQV	KMISDIEQV	0	4	1	0	0	KMISMDIEQV	PEPLIST	0.002122	10.428	0.037447	6.286	33343.2				1	HLA-E*01:03	KMISMDIEQV	KMISDIEQV	0	4	1	0	0	KMISMDIEQV	PEPLIST	0.002122	10.428	0.037447	6.286	33343.2
	1	HLA-E*01:01	KMLDEILLQL	KMDEILLQL	0	2	1	0	0	KMLDEILLQL	PEPLIST	0.083058	0.402	0.099448	0.551	17047.7	<=	SB		1	HLA-E*01:03	KMLDEILLQL	KMDEILLQL	0	2	1	0	0	KMLDEILLQL	PEPLIST	0.083058	0.402	0.099448	0.551	17047.7	<=	SB
	1	HLA-E*01:01	KMLDFETFL	KMLDFETFL	0	0	0	0	0	KMLDFETFL	PEPLIST	0.163763	0.123	0.149528	0.135	9916.13	<=	SB		1	HLA-E*01:03	KMLDFETFL	KMLDFETFL	0	0	0	0	0	KMLDFETFL	PEPLIST	0.163763	0.123	0.149528	0.135	9916.13	<=	SB
	1	HLA-E*01:01	KMLEIDPQKV	KMLEIPQKV	0	5	1	0	0	KMLEIDPQKV	PEPLIST	0.009005	4.265	0.034695	7.268	34351				1	HLA-E*01:03	KMLEIDPQKV	KMLEIPQKV	0	5	1	0	0	KMLEIDPQKV	PEPLIST	0.009005	4.265	0.034695	7.268	34351
	1	HLA-E*01:01	KMVGDVTGA	KMVGDVTGA	0	0	0	0	0	KMVGDVTGA	PEPLIST	0.000277	24.281	0.016211	22.613	41956.1				1	HLA-E*01:03	KMVGDVTGA	KMVGDVTGA	0	0	0	0	0	KMVGDVTGA	PEPLIST	0.000277	24.281	0.016211	22.613	41956.1
	1	HLA-E*01:01	KMVGDVTGAQA	KMDVTGAQA	0	2	2	0	0	KMVGDVTGAQA	PEPLIST	0.000215	26.417	0.011432	32.651	44182.6				1	HLA-E*01:03	KMVGDVTGAQA	KMDVTGAQA	0	2	2	0	0	KMVGDVTGAQA	PEPLIST	0.000215	26.417	0.011432	32.651	44182.6
	1	HLA-E*01:01	KMVGTTSVV	KMVGTTSVV	0	0	0	0	0	KMVGTTSVV	PEPLIST	0.011237	3.573	0.070636	1.483	23283.8				1	HLA-E*01:03	KMVGTTSVV	KMVGTTSVV	0	0	0	0	0	KMVGTTSVV	PEPLIST	0.011237	3.573	0.070636	1.483	23283.8
	1	HLA-E*01:01	KMVTGVASA	KMVTGVASA	0	0	0	0	0	KMVTGVASA	PEPLIST	0.002431	9.692	0.027973	10.619	36942.4				1	HLA-E*01:03	KMVTGVASA	KMVTGVASA	0	0	0	0	0	KMVTGVASA	PEPLIST	0.002431	9.692	0.027973	10.619	36942.4
	1	HLA-E*01:01	KMYEEFLSKV	KMYEEFLSV	0	8	1	0	0	KMYEEFLSKV	PEPLIST	0.017425	2.457	0.072125	1.403	22911.7				1	HLA-E*01:03	KMYEEFLSKV	KMYEEFLSV	0	8	1	0	0	KMYEEFLSKV	PEPLIST	0.017425	2.457	0.072125	1.403	22911.7
	1	HLA-E*01:01	KQQASQVLV	KQQASQVLV	0	0	0	0	0	KQQASQVLV	PEPLIST	0.07176	0.509	0.102234	0.504	16541.5	<=	WB		1	HLA-E*01:03	KQQASQVLV	KQQASQVLV	0	0	0	0	0	KQQASQVLV	PEPLIST	0.07176	0.509	0.102234	0.504	16541.5	<=	WB
	1	HLA-E*01:01	KQYGNEVFL	KQYGNEVFL	0	0	0	0	0	KQYGNEVFL	PEPLIST	0.22529	0.06	0.148909	0.137	9982.77	<=	SB		1	HLA-E*01:03	KQYGNEVFL	KQYGNEVFL	0	0	0	0	0	KQYGNEVFL	PEPLIST	0.22529	0.06	0.148909	0.137	9982.77	<=	SB
	1	HLA-E*01:01	KTIETSPSL	KTIETSPSL	0	0	0	0	0	KTIETSPSL	PEPLIST	0.299495	0.029	0.167257	0.09	8185.29	<=	SB		1	HLA-E*01:03	KTIETSPSL	KTIETSPSL	0	0	0	0	0	KTIETSPSL	PEPLIST	0.299495	0.029	0.167257	0.09	8185.29	<=	SB
	1	HLA-E*01:01	KTLEGEFSV	KTLEGEFSV	0	0	0	0	0	KTLEGEFSV	PEPLIST	0.032652	1.323	0.051863	3.185	28527.7	<=	WB		1	HLA-E*01:03	KTLEGEFSV	KTLEGEFSV	0	0	0	0	0	KTLEGEFSV	PEPLIST	0.032652	1.323	0.051863	3.185	28527.7	<=	WB
	1	HLA-E*01:01	KVADALTNA	KVADALTNA	0	0	0	0	0	KVADALTNA	PEPLIST	0.001095	14.422	0.018713	19.126	40835.5				1	HLA-E*01:03	KVADALTNA	KVADALTNA	0	0	0	0	0	KVADALTNA	PEPLIST	0.001095	14.422	0.018713	19.126	40835.5
	1	HLA-E*01:01	KVAPAPAVV	KVAPAPAVV	0	0	0	0	0	KVAPAPAVV	PEPLIST	0.069399	0.532	0.098299	0.57	17261	<=	WB		1	HLA-E*01:03	KVAPAPAVV	KVAPAPAVV	0	0	0	0	0	KVAPAPAVV	PEPLIST	0.069399	0.532	0.098299	0.57	17261	<=	WB
	1	HLA-E*01:01	KVFDPVPVGV	KVFDPVPVV	0	8	1	0	0	KVFDPVPVGV	PEPLIST	0.014449	2.91	0.044251	4.472	30976.7				1	HLA-E*01:03	KVFDPVPVGV	KVFDPVPVV	0	8	1	0	0	KVFDPVPVGV	PEPLIST	0.014449	2.91	0.044251	4.472	30976.7
	1	HLA-E*01:01	KVIDEIYRV	KVIDEIYRV	0	0	0	0	0	KVIDEIYRV	PEPLIST	0.037149	1.148	0.051523	3.235	28632.9	<=	WB		1	HLA-E*01:03	KVIDEIYRV	KVIDEIYRV	0	0	0	0	0	KVIDEIYRV	PEPLIST	0.037149	1.148	0.051523	3.235	28632.9	<=	WB
	1	HLA-E*01:01	KVLDFEHFL	KVLDFEHFL	0	0	0	0	0	KVLDFEHFL	PEPLIST	0.099825	0.287	0.088738	0.801	19142.2	<=	SB		1	HLA-E*01:03	KVLDFEHFL	KVLDFEHFL	0	0	0	0	0	KVLDFEHFL	PEPLIST	0.099825	0.287	0.088738	0.801	19142.2	<=	SB
	1	HLA-E*01:01	KVLERVNAV	KVLERVNAV	0	0	0	0	0	KVLERVNAV	PEPLIST	0.059147	0.645	0.071247	1.45	23130.4	<=	WB		1	HLA-E*01:03	KVLERVNAV	KVLERVNAV	0	0	0	0	0	KVLERVNAV	PEPLIST	0.059147	0.645	0.071247	1.45	23130.4	<=	WB
	1	HLA-E*01:01	LAAGPGPSLG	LAAGPGPSL	0	0	0	0	0	LAAGPGPSL	PEPLIST	0.00014	30.267	0.014064	26.519	42942.1				1	HLA-E*01:03	LAAGPGPSLG	LAAGPGPSL	0	0	0	0	0	LAAGPGPSL	PEPLIST	0.00014	30.267	0.014064	26.519	42942.1
	1	HLA-E*01:01	LAAGPSAAA	LAAGPSAAA	0	0	0	0	0	LAAGPSAAA	PEPLIST	0.000377	21.868	0.02158	15.783	39588.2				1	HLA-E*01:03	LAAGPSAAA	LAAGPSAAA	0	0	0	0	0	LAAGPSAAA	PEPLIST	0.000377	21.868	0.02158	15.783	39588.2
	1	HLA-E*01:01	LADDSVRSL	LADDSVRSL	0	0	0	0	0	LADDSVRSL	PEPLIST	0.100799	0.283	0.068197	1.64	23906.4	<=	SB		1	HLA-E*01:03	LADDSVRSL	LADDSVRSL	0	0	0	0	0	LADDSVRSL	PEPLIST	0.100799	0.283	0.068197	1.64	23906.4	<=	SB
	1	HLA-E*01:01	LANGQTKVL	LANGQTKVL	0	0	0	0	0	LANGQTKVL	PEPLIST	0.010009	3.925	0.035684	6.9	33985.4				1	HLA-E*01:03	LANGQTKVL	LANGQTKVL	0	0	0	0	0	LANGQTKVL	PEPLIST	0.010009	3.925	0.035684	6.9	33985.4
	1	HLA-E*01:01	LAQLLSEV	LAQ-LLSEV	0	0	0	3	1	LAQLLSEV	PEPLIST	0.000227	25.931	0.01202	31.07	43902.4				1	HLA-E*01:03	LAQLLSEV	LAQ-LLSEV	0	0	0	3	1	LAQLLSEV	PEPLIST	0.000227	25.931	0.01202	31.07	43902.4
	1	HLA-E*01:01	LDTNADKQL	LDTNADKQL	0	0	0	0	0	LDTNADKQL	PEPLIST	0.000739	16.991	0.009376	39.052	45176.5				1	HLA-E*01:03	LDTNADKQL	LDTNADKQL	0	0	0	0	0	LDTNADKQL	PEPLIST	0.000739	16.991	0.009376	39.052	45176.5
	1	HLA-E*01:01	LIKALVENI	LIKALVENI	0	0	0	0	0	LIKALVENI	PEPLIST	0.004372	6.898	0.03557	6.94	34027.3				1	HLA-E*01:03	LIKALVENI	LIKALVENI	0	0	0	0	0	LIKALVENI	PEPLIST	0.004372	6.898	0.03557	6.94	34027.3
	1	HLA-E*01:01	LLAAARLAAA	LAAARLAAA	0	1	1	0	0	LLAAARLAAA	PEPLIST	2.5e-05	49.5	0.014386	25.859	42792.8				1	HLA-E*01:03	LLAAARLAAA	LAAARLAAA	0	1	1	0	0	LLAAARLAAA	PEPLIST	2.5e-05	49.5	0.014386	25.859	42792.8
	1	HLA-E*01:01	LLAEKVEQL	LLAEKVEQL	0	0	0	0	0	LLAEKVEQL	PEPLIST	0.205592	0.071	0.121428	0.276	13439.5	<=	SB		1	HLA-E*01:03	LLAEKVEQL	LLAEKVEQL	0	0	0	0	0	LLAEKVEQL	PEPLIST	0.205592	0.071	0.121428	0.276	13439.5	<=	SB
	1	HLA-E*01:01	LLAPPSRPA	LLAPPSRPA	0	0	0	0	0	LLAPPSRPA	PEPLIST	0.002403	9.75	0.034578	7.313	34394.5				1	HLA-E*01:03	LLAPPSRPA	LLAPPSRPA	0	0	0	0	0	LLAPPSRPA	PEPLIST	0.002403	9.75	0.034578	7.313	34394.5
	1	HLA-E*01:01	LLDEPTNHL	LLDEPTNHL	0	0	0	0	0	LLDEPTNHL	PEPLIST	0.260978	0.046	0.131985	0.199	11988.8	<=	SB		1	HLA-E*01:03	LLDEPTNHL	LLDEPTNHL	0	0	0	0	0	LLDEPTNHL	PEPLIST	0.260978	0.046	0.131985	0.199	11988.8	<=	SB
	1	HLA-E*01:01	LLDHPRAEV	LLDHPRAEV	0	0	0	0	0	LLDHPRAEV	PEPLIST	0.017577	2.44	0.065948	1.794	24495.3				1	HLA-E*01:03	LLDHPRAEV	LLDHPRAEV	0	0	0	0	0	LLDHPRAEV	PEPLIST	0.017577	2.44	0.065948	1.794	24495.3
	1	HLA-E*01:01	LLDPSVFHV	LLDPSVFHV	0	0	0	0	0	LLDPSVFHV	PEPLIST	0.11521	0.23	0.105871	0.45	15903.2	<=	SB		1	HLA-E*01:03	LLDPSVFHV	LLDPSVFHV	0	0	0	0	0	LLDPSVFHV	PEPLIST	0.11521	0.23	0.105871	0.45	15903.2	<=	SB
	1	HLA-E*01:01	LLDPTNVFI	LLDPTNVFI	0	0	0	0	0	LLDPTNVFI	PEPLIST	0.101418	0.281	0.145912	0.146	10311.8	<=	SB		1	HLA-E*01:03	LLDPTNVFI	LLDPTNVFI	0	0	0	0	0	LLDPTNVFI	PEPLIST	0.101418	0.281	0.145912	0.146	10311.8	<=	SB
	1	HLA-E*01:01	LLDRFLATV	LLDRFLATV	0	0	0	0	0	LLDRFLATV	PEPLIST	0.014506	2.901	0.068511	1.619	23825.3				1	HLA-E*01:03	LLDRFLATV	LLDRFLATV	0	0	0	0	0	LLDRFLATV	PEPLIST	0.014506	2.901	0.068511	1.619	23825.3
	1	HLA-E*01:01	LLDVTPLSL	LLDVTPLSL	0	0	0	0	0	LLDVTPLSL	PEPLIST	0.197405	0.077	0.151149	0.13	9743.73	<=	SB		1	HLA-E*01:03	LLDVTPLSL	LLDVTPLSL	0	0	0	0	0	LLDVTPLSL	PEPLIST	0.197405	0.077	0.151149	0.13	9743.73	<=	SB
	1	HLA-E*01:01	LLFEGEKITI	LLFEEKITI	0	4	1	0	0	LLFEGEKITI	PEPLIST	0.004875	6.468	0.042041	4.954	31726.4				1	HLA-E*01:03	LLFEGEKITI	LLFEEKITI	0	4	1	0	0	LLFEGEKITI	PEPLIST	0.004875	6.468	0.042041	4.954	31726.4
	1	HLA-E*01:01	LLGNVLVTV	LLGNVLVTV	0	0	0	0	0	LLGNVLVTV	PEPLIST	0.002575	9.396	0.027599	10.845	37092.2				1	HLA-E*01:03	LLGNVLVTV	LLGNVLVTV	0	0	0	0	0	LLGNVLVTV	PEPLIST	0.002575	9.396	0.027599	10.845	37092.2
	1	HLA-E*01:01	LLGPAGARA	LLGPAGARA	0	0	0	0	0	LLGPAGARA	PEPLIST	0.000328	22.933	0.021626	15.736	39568.6				1	HLA-E*01:03	LLGPAGARA	LLGPAGARA	0	0	0	0	0	LLGPAGARA	PEPLIST	0.000328	22.933	0.021626	15.736	39568.6
	1	HLA-E*01:01	LLGPRLVLA	LLGPRLVLA	0	0	0	0	0	LLGPRLVLA	PEPLIST	0.007471	4.871	0.035167	7.087	34176				1	HLA-E*01:03	LLGPRLVLA	LLGPRLVLA	0	0	0	0	0	LLGPRLVLA	PEPLIST	0.007471	4.871	0.035167	7.087	34176
	1	HLA-E*01:01	LLHSGVENMQV	LLHSGVEQV	0	7	2	0	0	LLHSGVENMQV	PEPLIST	0.000277	24.281	0.013265	28.151	43315				1	HLA-E*01:03	LLHSGVENMQV	LLHSGVEQV	0	7	2	0	0	LLHSGVENMQV	PEPLIST	0.000277	24.281	0.013265	28.151	43315
	1	HLA-E*01:01	LLIDDEYKV	LLIDDEYKV	0	0	0	0	0	LLIDDEYKV	PEPLIST	0.004138	7.131	0.021895	15.458	39453.6				1	HLA-E*01:03	LLIDDEYKV	LLIDDEYKV	0	0	0	0	0	LLIDDEYKV	PEPLIST	0.004138	7.131	0.021895	15.458	39453.6
	1	HLA-E*01:01	LLLDVPTAAV	LLDVPTAAV	0	1	1	0	0	LLLDVPTAAV	PEPLIST	0.000779	16.647	0.03015	9.341	36082.4				1	HLA-E*01:03	LLLDVPTAAV	LLDVPTAAV	0	1	1	0	0	LLLDVPTAAV	PEPLIST	0.000779	16.647	0.03015	9.341	36082.4
	1	HLA-E*01:01	LLLDVPTAAVQA	LLLDVPTAA	0	8	3	0	0	LLLDVPTAAVQA	PEPLIST	2.7e-05	48.5	0.008909	40.836	45405.3				1	HLA-E*01:03	LLLDVPTAAVQA	LLLDVPTAA	0	8	3	0	0	LLLDVPTAAVQA	PEPLIST	2.7e-05	48.5	0.008909	40.836	45405.3
	1	HLA-E*01:01	LLLNLAPAPLNA	LLAPAPLNA	0	1	3	0	0	LLLNLAPAPLNA	PEPLIST	1.9e-05	53.125	0.008766	41.412	45475.6				1	HLA-E*01:03	LLLNLAPAPLNA	LLAPAPLNA	0	1	3	0	0	LLLNLAPAPLNA	PEPLIST	1.9e-05	53.125	0.008766	41.412	45475.6
	1	HLA-E*01:01	LLLNLDDSFS	LLLNLDDSF	0	0	0	0	0	LLLNLDDSF	PEPLIST	1.9e-05	53.125	0.006178	55.417	46767				1	HLA-E*01:03	LLLNLDDSFS	LLLNLDDSF	0	0	0	0	0	LLLNLDDSF	PEPLIST	1.9e-05	53.125	0.006178	55.417	46767
	1	HLA-E*01:01	LLLPGPSAA	LLLPGPSAA	0	0	0	0	0	LLLPGPSAA	PEPLIST	0.000826	16.241	0.019927	17.63	40302.6				1	HLA-E*01:03	LLLPGPSAA	LLLPGPSAA	0	0	0	0	0	LLLPGPSAA	PEPLIST	0.000826	16.241	0.019927	17.63	40302.6
	1	HLA-E*01:01	LLLPLPVPA	LLLPLPVPA	0	0	0	0	0	LLLPLPVPA	PEPLIST	0.000692	17.451	0.021271	16.11	39720.8				1	HLA-E*01:03	LLLPLPVPA	LLLPLPVPA	0	0	0	0	0	LLLPLPVPA	PEPLIST	0.000692	17.451	0.021271	16.11	39720.8
	1	HLA-E*01:01	LLLPPPPCPA	LLPPPPCPA	0	1	1	0	0	LLLPPPPCPA	PEPLIST	0.000269	24.531	0.023195	14.175	38902.5				1	HLA-E*01:03	LLLPPPPCPA	LLPPPPCPA	0	1	1	0	0	LLLPPPPCPA	PEPLIST	0.000269	24.531	0.023195	14.175	38902.5
	1	HLA-E*01:01	LLLPPQPALA	LLPPQPALA	0	1	1	0	0	LLLPPQPALA	PEPLIST	0.001514	12.385	0.031059	8.869	35729.3				1	HLA-E*01:03	LLLPPQPALA	LLPPQPALA	0	1	1	0	0	LLLPPQPALA	PEPLIST	0.001514	12.385	0.031059	8.869	35729.3
	1	HLA-E*01:01	LLNSEVHML	LLNSEVHML	0	0	0	0	0	LLNSEVHML	PEPLIST	0.067622	0.549	0.087775	0.825	19342.7	<=	WB		1	HLA-E*01:03	LLNSEVHML	LLNSEVHML	0	0	0	0	0	LLNSEVHML	PEPLIST	0.067622	0.549	0.087775	0.825	19342.7	<=	WB
	1	HLA-E*01:01	LLPPQPALA	LLPPQPALA	0	0	0	0	0	LLPPQPALA	PEPLIST	0.022972	1.88	0.075793	1.23	22020.2	<=	WB		1	HLA-E*01:03	LLPPQPALA	LLPPQPALA	0	0	0	0	0	LLPPQPALA	PEPLIST	0.022972	1.88	0.075793	1.23	22020.2	<=	WB
	1	HLA-E*01:01	LLSENHSTV	LLSENHSTV	0	0	0	0	0	LLSENHSTV	PEPLIST	0.034851	1.238	0.093681	0.667	18145.4	<=	WB		1	HLA-E*01:03	LLSENHSTV	LLSENHSTV	0	0	0	0	0	LLSENHSTV	PEPLIST	0.034851	1.238	0.093681	0.667	18145.4	<=	WB
	1	HLA-E*01:01	LLYQEGAKMAV	LQEGAKMAV	0	1	2	0	0	LLYQEGAKMAV	PEPLIST	0.000361	22.2	0.018607	19.259	40882.4				1	HLA-E*01:03	LLYQEGAKMAV	LQEGAKMAV	0	1	2	0	0	LLYQEGAKMAV	PEPLIST	0.000361	22.2	0.018607	19.259	40882.4
	1	HLA-E*01:01	LMAEMGVHSV	LMAEGVHSV	0	4	1	0	0	LMAEMGVHSV	PEPLIST	0.001947	10.894	0.043753	4.578	31144.1				1	HLA-E*01:03	LMAEMGVHSV	LMAEGVHSV	0	4	1	0	0	LMAEMGVHSV	PEPLIST	0.001947	10.894	0.043753	4.578	31144.1
	1	HLA-E*01:01	LMDPNSPERV	LMDPNSPRV	0	7	1	0	0	LMDPNSPERV	PEPLIST	0.012713	3.244	0.068477	1.622	23834.1				1	HLA-E*01:03	LMDPNSPERV	LMDPNSPRV	0	7	1	0	0	LMDPNSPERV	PEPLIST	0.012713	3.244	0.068477	1.622	23834.1
	1	HLA-E*01:01	LMTKEISSV	LMTKEISSV	0	0	0	0	0	LMTKEISSV	PEPLIST	0.011738	3.448	0.051848	3.188	28532.4				1	HLA-E*01:03	LMTKEISSV	LMTKEISSV	0	0	0	0	0	LMTKEISSV	PEPLIST	0.011738	3.448	0.051848	3.188	28532.4
	1	HLA-E*01:01	LMVDHVTEV	LMVDHVTEV	0	0	0	0	0	LMVDHVTEV	PEPLIST	0.030888	1.39	0.074704	1.279	22281.2	<=	WB		1	HLA-E*01:03	LMVDHVTEV	LMVDHVTEV	0	0	0	0	0	LMVDHVTEV	PEPLIST	0.030888	1.39	0.074704	1.279	22281.2	<=	WB
	1	HLA-E*01:01	LNETGDEPFQYK	LGDEPFQYK	0	1	3	0	0	LNETGDEPFQYK	PEPLIST	1e-05	61.667	0.00524	62.609	47244.1				1	HLA-E*01:03	LNETGDEPFQYK	LGDEPFQYK	0	1	3	0	0	LNETGDEPFQYK	PEPLIST	1e-05	61.667	0.00524	62.609	47244.1
	1	HLA-E*01:01	LPMISFLIL	LPMISFLIL	0	0	0	0	0	LPMISFLIL	PEPLIST	0.003825	7.487	0.040797	5.281	32156.3				1	HLA-E*01:03	LPMISFLIL	LPMISFLIL	0	0	0	0	0	LPMISFLIL	PEPLIST	0.003825	7.487	0.040797	5.281	32156.3
	1	HLA-E*01:01	LQYSVEVQV	LQYSVEVQV	0	0	0	0	0	LQYSVEVQV	PEPLIST	0.031231	1.377	0.041734	5.026	31832	<=	WB		1	HLA-E*01:03	LQYSVEVQV	LQYSVEVQV	0	0	0	0	0	LQYSVEVQV	PEPLIST	0.031231	1.377	0.041734	5.026	31832	<=	WB
	1	HLA-E*01:01	LSDNIISGGL	LSDNIISGL	0	7	1	0	0	LSDNIISGGL	PEPLIST	0.001739	11.554	0.039283	5.704	32687.4				1	HLA-E*01:03	LSDNIISGGL	LSDNIISGL	0	7	1	0	0	LSDNIISGGL	PEPLIST	0.001739	11.554	0.039283	5.704	32687.4
	1	HLA-E*01:01	LSLTEASLQKL	LTEASLQKL	0	1	2	0	0	LSLTEASLQKL	PEPLIST	0.000805	16.422	0.023519	13.883	38766.4				1	HLA-E*01:03	LSLTEASLQKL	LTEASLQKL	0	1	2	0	0	LSLTEASLQKL	PEPLIST	0.000805	16.422	0.023519	13.883	38766.4
	1	HLA-E*01:01	LVMQGVSRA	LVMQGVSRA	0	0	0	0	0	LVMQGVSRA	PEPLIST	0.000368	22.044	0.013186	28.324	43352				1	HLA-E*01:03	LVMQGVSRA	LVMQGVSRA	0	0	0	0	0	LVMQGVSRA	PEPLIST	0.000368	22.044	0.013186	28.324	43352
	1	HLA-E*01:01	LWTALLFL	LWT-ALLFL	0	0	0	3	1	LWTALLFL	PEPLIST	0.00064	17.961	0.017858	20.225	41215				1	HLA-E*01:03	LWTALLFL	LWT-ALLFL	0	0	0	3	1	LWTALLFL	PEPLIST	0.00064	17.961	0.017858	20.225	41215
	1	HLA-E*01:01	MAPPAHKSI	MAPPAHKSI	0	0	0	0	0	MAPPAHKSI	PEPLIST	0.173385	0.108	0.152245	0.126	9628.87	<=	SB		1	HLA-E*01:03	MAPPAHKSI	MAPPAHKSI	0	0	0	0	0	MAPPAHKSI	PEPLIST	0.173385	0.108	0.152245	0.126	9628.87	<=	SB
	1	HLA-E*01:01	MDKAKASPL	MDKAKASPL	0	0	0	0	0	MDKAKASPL	PEPLIST	0.012781	3.23	0.049008	3.613	29422.7				1	HLA-E*01:03	MDKAKASPL	MDKAKASPL	0	0	0	0	0	MDKAKASPL	PEPLIST	0.012781	3.23	0.049008	3.613	29422.7
	1	HLA-E*01:01	MEGISNVIQN	MEISNVIQN	0	2	1	0	0	MEGISNVIQN	PEPLIST	2e-06	85	0.003864	75.814	47952.7				1	HLA-E*01:03	MEGISNVIQN	MEISNVIQN	0	2	1	0	0	MEGISNVIQN	PEPLIST	2e-06	85	0.003864	75.814	47952.7
	1	HLA-E*01:01	MEMSLKVLE	MEMSLKVLE	0	0	0	0	0	MEMSLKVLE	PEPLIST	4.1e-05	43.25	0.006724	51.861	46491.6				1	HLA-E*01:03	MEMSLKVLE	MEMSLKVLE	0	0	0	0	0	MEMSLKVLE	PEPLIST	4.1e-05	43.25	0.006724	51.861	46491.6
	1	HLA-E*01:01	MITLLLPIL	MITLLLPIL	0	0	0	0	0	MITLLLPIL	PEPLIST	0.005651	5.867	0.054824	2.804	27628.3				1	HLA-E*01:03	MITLLLPIL	MITLLLPIL	0	0	0	0	0	MITLLLPIL	PEPLIST	0.005651	5.867	0.054824	2.804	27628.3
	1	HLA-E*01:01	MLALLTQVA	MLALLTQVA	0	0	0	0	0	MLALLTQVA	PEPLIST	0.000721	17.167	0.022162	15.183	39339.7				1	HLA-E*01:03	MLALLTQVA	MLALLTQVA	0	0	0	0	0	MLALLTQVA	PEPLIST	0.000721	17.167	0.022162	15.183	39339.7
	1	HLA-E*01:01	MLIGEIFEL	MLIGEIFEL	0	0	0	0	0	MLIGEIFEL	PEPLIST	0.045144	0.903	0.083887	0.932	20173.8	<=	WB		1	HLA-E*01:03	MLIGEIFEL	MLIGEIFEL	0	0	0	0	0	MLIGEIFEL	PEPLIST	0.045144	0.903	0.083887	0.932	20173.8	<=	WB
	1	HLA-E*01:01	MLLSVPLLLG	MLLSVPLLL	0	0	0	0	0	MLLSVPLLL	PEPLIST	0.000138	30.4	0.018563	19.315	40901.9				1	HLA-E*01:03	MLLSVPLLLG	MLLSVPLLL	0	0	0	0	0	MLLSVPLLL	PEPLIST	0.000138	30.4	0.018563	19.315	40901.9
	1	HLA-E*01:01	MLTELEKAL	MLTELEKAL	0	0	0	0	0	MLTELEKAL	PEPLIST	0.016746	2.547	0.057358	2.51	26881.1				1	HLA-E*01:03	MLTELEKAL	MLTELEKAL	0	0	0	0	0	MLTELEKAL	PEPLIST	0.016746	2.547	0.057358	2.51	26881.1
	1	HLA-E*01:01	MLVLCASTEL	MLVLASTEL	0	4	1	0	0	MLVLCASTEL	PEPLIST	0.000514	19.556	0.047485	3.863	29911.6				1	HLA-E*01:03	MLVLCASTEL	MLVLASTEL	0	4	1	0	0	MLVLCASTEL	PEPLIST	0.000514	19.556	0.047485	3.863	29911.6
	1	HLA-E*01:01	MMLDDLLQL	MMLDDLLQL	0	0	0	0	0	MMLDDLLQL	PEPLIST	0.102406	0.277	0.109359	0.399	15314.2	<=	SB		1	HLA-E*01:03	MMLDDLLQL	MMLDDLLQL	0	0	0	0	0	MMLDDLLQL	PEPLIST	0.102406	0.277	0.109359	0.399	15314.2	<=	SB
	1	HLA-E*01:01	MNVAEVDKV	MNVAEVDKV	0	0	0	0	0	MNVAEVDKV	PEPLIST	0.000914	15.574	0.019093	18.648	40668				1	HLA-E*01:03	MNVAEVDKV	MNVAEVDKV	0	0	0	0	0	MNVAEVDKV	PEPLIST	0.000914	15.574	0.019093	18.648	40668
	1	HLA-E*01:01	MTSEIHNTV	MTSEIHNTV	0	0	0	0	0	MTSEIHNTV	PEPLIST	0.03487	1.237	0.097513	0.584	17408.4	<=	WB		1	HLA-E*01:03	MTSEIHNTV	MTSEIHNTV	0	0	0	0	0	MTSEIHNTV	PEPLIST	0.03487	1.237	0.097513	0.584	17408.4	<=	WB
	1	HLA-E*01:01	MVDGTLLLL	MVDGTLLLL	0	0	0	0	0	MVDGTLLLL	PEPLIST	0.096162	0.303	0.124982	0.247	12932.5	<=	SB		1	HLA-E*01:03	MVDGTLLLL	MVDGTLLLL	0	0	0	0	0	MVDGTLLLL	PEPLIST	0.096162	0.303	0.124982	0.247	12932.5	<=	SB
	1	HLA-E*01:01	NADPQAVTM	NADPQAVTM	0	0	0	0	0	NADPQAVTM	PEPLIST	0.058244	0.657	0.053711	2.934	27963	<=	WB		1	HLA-E*01:03	NADPQAVTM	NADPQAVTM	0	0	0	0	0	NADPQAVTM	PEPLIST	0.058244	0.657	0.053711	2.934	27963	<=	WB
	1	HLA-E*01:01	NIFPNPEATFV	NIFPNPTFV	0	6	2	0	0	NIFPNPEATFV	PEPLIST	0.001192	13.881	0.026141	11.847	37682				1	HLA-E*01:03	NIFPNPEATFV	NIFPNPTFV	0	6	2	0	0	NIFPNPEATFV	PEPLIST	0.001192	13.881	0.026141	11.847	37682
	1	HLA-E*01:01	NIVEKLREV	NIVEKLREV	0	0	0	0	0	NIVEKLREV	PEPLIST	0.013365	3.108	0.036012	6.787	33865				1	HLA-E*01:03	NIVEKLREV	NIVEKLREV	0	0	0	0	0	NIVEKLREV	PEPLIST	0.013365	3.108	0.036012	6.787	33865
	1	HLA-E*01:01	NLAEKLIGV	NLAEKLIGV	0	0	0	0	0	NLAEKLIGV	PEPLIST	0.021692	1.983	0.050032	3.451	29098.5	<=	WB		1	HLA-E*01:03	NLAEKLIGV	NLAEKLIGV	0	0	0	0	0	NLAEKLIGV	PEPLIST	0.021692	1.983	0.050032	3.451	29098.5	<=	WB
	1	HLA-E*01:01	NLAEKPKTV	NLAEKPKTV	0	0	0	0	0	NLAEKPKTV	PEPLIST	0.033082	1.307	0.037618	6.225	33281.6	<=	WB		1	HLA-E*01:03	NLAEKPKTV	NLAEKPKTV	0	0	0	0	0	NLAEKPKTV	PEPLIST	0.033082	1.307	0.037618	6.225	33281.6	<=	WB
	1	HLA-E*01:01	NLAENISRV	NLAENISRV	0	0	0	0	0	NLAENISRV	PEPLIST	0.012967	3.191	0.04042	5.384	32287.7				1	HLA-E*01:03	NLAENISRV	NLAENISRV	0	0	0	0	0	NLAENISRV	PEPLIST	0.012967	3.191	0.04042	5.384	32287.7
	1	HLA-E*01:01	NLAPAPLNA	NLAPAPLNA	0	0	0	0	0	NLAPAPLNA	PEPLIST	0.000996	14.994	0.022563	14.784	39169.4				1	HLA-E*01:03	NLAPAPLNA	NLAPAPLNA	0	0	0	0	0	NLAPAPLNA	PEPLIST	0.000996	14.994	0.022563	14.784	39169.4
	1	HLA-E*01:01	NLASFIEQV	NLASFIEQV	0	0	0	0	0	NLASFIEQV	PEPLIST	0.006401	5.395	0.036173	6.731	33806				1	HLA-E*01:03	NLASFIEQV	NLASFIEQV	0	0	0	0	0	NLASFIEQV	PEPLIST	0.006401	5.395	0.036173	6.731	33806
	1	HLA-E*01:01	NLDPAVHEV	NLDPAVHEV	0	0	0	0	0	NLDPAVHEV	PEPLIST	0.078937	0.441	0.071251	1.45	23129.4	<=	SB		1	HLA-E*01:03	NLDPAVHEV	NLDPAVHEV	0	0	0	0	0	NLDPAVHEV	PEPLIST	0.078937	0.441	0.071251	1.45	23129.4	<=	SB
	1	HLA-E*01:01	NLIDLDDLYV	NLIDLDLYV	0	5	1	0	0	NLIDLDDLYV	PEPLIST	0.000179	27.957	0.017299	21.006	41465.1				1	HLA-E*01:03	NLIDLDDLYV	NLIDLDLYV	0	5	1	0	0	NLIDLDDLYV	PEPLIST	0.000179	27.957	0.017299	21.006	41465.1
	1	HLA-E*01:01	NLLEQFILL	NLLEQFILL	0	0	0	0	0	NLLEQFILL	PEPLIST	0.054855	0.706	0.075044	1.264	22199.4	<=	WB		1	HLA-E*01:03	NLLEQFILL	NLLEQFILL	0	0	0	0	0	NLLEQFILL	PEPLIST	0.054855	0.706	0.075044	1.264	22199.4	<=	WB
	1	HLA-E*01:01	NLLKLIAEV	NLLKLIAEV	0	0	0	0	0	NLLKLIAEV	PEPLIST	0.003504	7.866	0.028295	10.424	36814				1	HLA-E*01:03	NLLKLIAEV	NLLKLIAEV	0	0	0	0	0	NLLKLIAEV	PEPLIST	0.003504	7.866	0.028295	10.424	36814
	1	HLA-E*01:01	NLMEQPIKV	NLMEQPIKV	0	0	0	0	0	NLMEQPIKV	PEPLIST	0.036917	1.157	0.047711	3.826	29838.5	<=	WB		1	HLA-E*01:03	NLMEQPIKV	NLMEQPIKV	0	0	0	0	0	NLMEQPIKV	PEPLIST	0.036917	1.157	0.047711	3.826	29838.5	<=	WB
	1	HLA-E*01:01	NLYPFVKTV	NLYPFVKTV	0	0	0	0	0	NLYPFVKTV	PEPLIST	0.045877	0.887	0.059552	2.31	26250.5	<=	WB		1	HLA-E*01:03	NLYPFVKTV	NLYPFVKTV	0	0	0	0	0	NLYPFVKTV	PEPLIST	0.045877	0.887	0.059552	2.31	26250.5	<=	WB
	1	HLA-E*01:01	NMFGTKFETV	NMFTKFETV	0	3	1	0	0	NMFGTKFETV	PEPLIST	0.002743	9.06	0.043731	4.583	31151.5				1	HLA-E*01:03	NMFGTKFETV	NMFTKFETV	0	3	1	0	0	NMFGTKFETV	PEPLIST	0.002743	9.06	0.043731	4.583	31151.5
	1	HLA-E*01:01	NMVAKVDEV	NMVAKVDEV	0	0	0	0	0	NMVAKVDEV	PEPLIST	0.009345	4.143	0.042794	4.789	31469				1	HLA-E*01:03	NMVAKVDEV	NMVAKVDEV	0	0	0	0	0	NMVAKVDEV	PEPLIST	0.009345	4.143	0.042794	4.789	31469
	1	HLA-E*01:01	NMVDIIHSV	NMVDIIHSV	0	0	0	0	0	NMVDIIHSV	PEPLIST	0.021944	1.963	0.044985	4.327	30731.7	<=	WB		1	HLA-E*01:03	NMVDIIHSV	NMVDIIHSV	0	0	0	0	0	NMVDIIHSV	PEPLIST	0.021944	1.963	0.044985	4.327	30731.7	<=	WB
	1	HLA-E*01:01	NMYGKVVTV	NMYGKVVTV	0	0	0	0	0	NMYGKVVTV	PEPLIST	0.135232	0.175	0.10793	0.419	15552.9	<=	SB		1	HLA-E*01:03	NMYGKVVTV	NMYGKVVTV	0	0	0	0	0	NMYGKVVTV	PEPLIST	0.135232	0.175	0.10793	0.419	15552.9	<=	SB
	1	HLA-E*01:01	NTIDPSHPM	NTIDPSHPM	0	0	0	0	0	NTIDPSHPM	PEPLIST	0.014207	2.948	0.042367	4.882	31614.7				1	HLA-E*01:03	NTIDPSHPM	NTIDPSHPM	0	0	0	0	0	NTIDPSHPM	PEPLIST	0.014207	2.948	0.042367	4.882	31614.7
	1	HLA-E*01:01	PHPPPPPPP	PHPPPPPPP	0	0	0	0	0	PHPPPPPPP	PEPLIST	0.000248	25.207	0.00926	39.487	45233.2				1	HLA-E*01:03	PHPPPPPPP	PHPPPPPPP	0	0	0	0	0	PHPPPPPPP	PEPLIST	0.000248	25.207	0.00926	39.487	45233.2
	1	HLA-E*01:01	PSIPRLAK	PSIPR-LAK	0	0	0	5	1	PSIPRLAK	PEPLIST	8e-06	65	0.004291	71.418	47731.7				1	HLA-E*01:03	PSIPRLAK	PSIPR-LAK	0	0	0	5	1	PSIPRLAK	PEPLIST	8e-06	65	0.004291	71.418	47731.7
	1	HLA-E*01:01	PSPPPPPPP	PSPPPPPPP	0	0	0	0	0	PSPPPPPPP	PEPLIST	0.00055	19.056	0.01113	33.479	44327.2				1	HLA-E*01:03	PSPPPPPPP	PSPPPPPPP	0	0	0	0	0	PSPPPPPPP	PEPLIST	0.00055	19.056	0.01113	33.479	44327.2
	1	HLA-E*01:01	QILPNGPILQ	QILPNGPIL	0	0	0	0	0	QILPNGPIL	PEPLIST	7.6e-05	36.429	0.009505	38.595	45113.5				1	HLA-E*01:03	QILPNGPILQ	QILPNGPIL	0	0	0	0	0	QILPNGPIL	PEPLIST	7.6e-05	36.429	0.009505	38.595	45113.5
	1	HLA-E*01:01	QLFSEIHNL	QLFSEIHNL	0	0	0	0	0	QLFSEIHNL	PEPLIST	0.104309	0.27	0.082903	0.965	20389.7	<=	SB		1	HLA-E*01:03	QLFSEIHNL	QLFSEIHNL	0	0	0	0	0	QLFSEIHNL	PEPLIST	0.104309	0.27	0.082903	0.965	20389.7	<=	SB
	1	HLA-E*01:01	QLYRGLGGQL	QLYRGGGQL	0	5	1	0	0	QLYRGLGGQL	PEPLIST	0.002237	10.122	0.036696	6.551	33615.3				1	HLA-E*01:03	QLYRGLGGQL	QLYRGGGQL	0	5	1	0	0	QLYRGLGGQL	PEPLIST	0.002237	10.122	0.036696	6.551	33615.3
	1	HLA-E*01:01	QMFEGPLAL	QMFEGPLAL	0	0	0	0	0	QMFEGPLAL	PEPLIST	0.339635	0.02	0.18675	0.057	6628.84	<=	SB		1	HLA-E*01:03	QMFEGPLAL	QMFEGPLAL	0	0	0	0	0	QMFEGPLAL	PEPLIST	0.339635	0.02	0.18675	0.057	6628.84	<=	SB
	1	HLA-E*01:01	QSPSANVL	QSP-SANVL	0	0	0	3	1	QSPSANVL	PEPLIST	0.028863	1.484	0.058392	2.414	26582	<=	WB		1	HLA-E*01:03	QSPSANVL	QSP-SANVL	0	0	0	3	1	QSPSANVL	PEPLIST	0.028863	1.484	0.058392	2.414	26582	<=	WB
	1	HLA-E*01:01	QVENGGVLG	QVENGGVLG	0	0	0	0	0	QVENGGVLG	PEPLIST	2.1e-05	51.875	0.005137	63.47	47296.8				1	HLA-E*01:03	QVENGGVLG	QVENGGVLG	0	0	0	0	0	QVENGGVLG	PEPLIST	2.1e-05	51.875	0.005137	63.47	47296.8
	1	HLA-E*01:01	RAVAPTMSL	RAVAPTMSL	0	0	0	0	0	RAVAPTMSL	PEPLIST	0.177738	0.102	0.148146	0.139	10065.5	<=	SB		1	HLA-E*01:03	RAVAPTMSL	RAVAPTMSL	0	0	0	0	0	RAVAPTMSL	PEPLIST	0.177738	0.102	0.148146	0.139	10065.5	<=	SB
	1	HLA-E*01:01	RFLLMMLSM	RFLLMMLSM	0	0	0	0	0	RFLLMMLSM	PEPLIST	0.009569	4.063	0.027984	10.612	36938.1				1	HLA-E*01:03	RFLLMMLSM	RFLLMMLSM	0	0	0	0	0	RFLLMMLSM	PEPLIST	0.009569	4.063	0.027984	10.612	36938.1
	1	HLA-E*01:01	RIADQFLGA	RIADQFLGA	0	0	0	0	0	RIADQFLGA	PEPLIST	0.001554	12.214	0.026581	11.537	37503.1				1	HLA-E*01:03	RIADQFLGA	RIADQFLGA	0	0	0	0	0	RIADQFLGA	PEPLIST	0.001554	12.214	0.026581	11.537	37503.1
	1	HLA-E*01:01	RIIDVVYNA	RIIDVVYNA	0	0	0	0	0	RIIDVVYNA	PEPLIST	0.003498	7.874	0.017123	21.26	41544.1				1	HLA-E*01:03	RIIDVVYNA	RIIDVVYNA	0	0	0	0	0	RIIDVVYNA	PEPLIST	0.003498	7.874	0.017123	21.26	41544.1
	1	HLA-E*01:01	RLAPSMAMV	RLAPSMAMV	0	0	0	0	0	RLAPSMAMV	PEPLIST	0.05268	0.749	0.12529	0.245	12889.5	<=	WB		1	HLA-E*01:03	RLAPSMAMV	RLAPSMAMV	0	0	0	0	0	RLAPSMAMV	PEPLIST	0.05268	0.749	0.12529	0.245	12889.5	<=	WB
	1	HLA-E*01:01	RLAQAMETA	RLAQAMETA	0	0	0	0	0	RLAQAMETA	PEPLIST	0.001465	12.594	0.028793	10.123	36616.2				1	HLA-E*01:03	RLAQAMETA	RLAQAMETA	0	0	0	0	0	RLAQAMETA	PEPLIST	0.001465	12.594	0.028793	10.123	36616.2
	1	HLA-E*01:01	RLDELGGVYL	RLDEGGVYL	0	4	1	0	0	RLDELGGVYL	PEPLIST	0.064346	0.581	0.113645	0.352	14620.3	<=	WB		1	HLA-E*01:03	RLDELGGVYL	RLDEGGVYL	0	4	1	0	0	RLDELGGVYL	PEPLIST	0.064346	0.581	0.113645	0.352	14620.3	<=	WB
	1	HLA-E*01:01	RLDSTGVNV	RLDSTGVNV	0	0	0	0	0	RLDSTGVNV	PEPLIST	0.04309	0.961	0.085619	0.88	19799.3	<=	WB		1	HLA-E*01:03	RLDSTGVNV	RLDSTGVNV	0	0	0	0	0	RLDSTGVNV	PEPLIST	0.04309	0.961	0.085619	0.88	19799.3	<=	WB
	1	HLA-E*01:01	RLFADILNDV	RLFADILNV	0	8	1	0	0	RLFADILNDV	PEPLIST	0.001253	13.579	0.029506	9.701	36334.7				1	HLA-E*01:03	RLFADILNDV	RLFADILNV	0	8	1	0	0	RLFADILNDV	PEPLIST	0.001253	13.579	0.029506	9.701	36334.7
	1	HLA-E*01:01	RLFNDPVAMV	RFNDPVAMV	0	1	1	0	0	RLFNDPVAMV	PEPLIST	0.012823	3.221	0.052839	3.044	28228.1				1	HLA-E*01:03	RLFNDPVAMV	RFNDPVAMV	0	1	1	0	0	RLFNDPVAMV	PEPLIST	0.012823	3.221	0.052839	3.044	28228.1
	1	HLA-E*01:01	RLIEEENML	RLIEEENML	0	0	0	0	0	RLIEEENML	PEPLIST	0.082561	0.407	0.090244	0.757	18832.9	<=	SB		1	HLA-E*01:03	RLIEEENML	RLIEEENML	0	0	0	0	0	RLIEEENML	PEPLIST	0.082561	0.407	0.090244	0.757	18832.9	<=	SB
	1	HLA-E*01:01	RLLENMTEV	RLLENMTEV	0	0	0	0	0	RLLENMTEV	PEPLIST	0.055286	0.698	0.086575	0.856	19595.5	<=	WB		1	HLA-E*01:03	RLLENMTEV	RLLENMTEV	0	0	0	0	0	RLLENMTEV	PEPLIST	0.055286	0.698	0.086575	0.856	19595.5	<=	WB
	1	HLA-E*01:01	RLMDPPSNEA	RMDPPSNEA	0	1	1	0	0	RLMDPPSNEA	PEPLIST	0.001983	10.798	0.024721	12.909	38265.4				1	HLA-E*01:03	RLMDPPSNEA	RMDPPSNEA	0	1	1	0	0	RLMDPPSNEA	PEPLIST	0.001983	10.798	0.024721	12.909	38265.4
	1	HLA-E*01:01	RLMDPPSNEAV	RLPPSNEAV	0	2	2	0	0	RLMDPPSNEAV	PEPLIST	0.019147	2.263	0.050171	3.431	29054.8				1	HLA-E*01:03	RLMDPPSNEAV	RLPPSNEAV	0	2	2	0	0	RLMDPPSNEAV	PEPLIST	0.019147	2.263	0.050171	3.431	29054.8
	1	HLA-E*01:01	RLMNDMTAV	RLMNDMTAV	0	0	0	0	0	RLMNDMTAV	PEPLIST	0.011038	3.63	0.063618	1.959	25120.7				1	HLA-E*01:03	RLMNDMTAV	RLMNDMTAV	0	0	0	0	0	RLMNDMTAV	PEPLIST	0.011038	3.63	0.063618	1.959	25120.7
	1	HLA-E*01:01	RLPDDDPTAV	RLPDDPTAV	0	3	1	0	0	RLPDDDPTAV	PEPLIST	0.011379	3.532	0.041938	4.977	31761.8				1	HLA-E*01:03	RLPDDDPTAV	RLPDDPTAV	0	3	1	0	0	RLPDDDPTAV	PEPLIST	0.011379	3.532	0.041938	4.977	31761.8
	1	HLA-E*01:01	RLPPDFFGV	RLPPDFFGV	0	0	0	0	0	RLPPDFFGV	PEPLIST	0.151712	0.143	0.176056	0.075	7441.97	<=	SB		1	HLA-E*01:03	RLPPDFFGV	RLPPDFFGV	0	0	0	0	0	RLPPDFFGV	PEPLIST	0.151712	0.143	0.176056	0.075	7441.97	<=	SB
	1	HLA-E*01:01	RLQDELVTL	RLQDELVTL	0	0	0	0	0	RLQDELVTL	PEPLIST	0.238053	0.056	0.1415	0.163	10816	<=	SB		1	HLA-E*01:03	RLQDELVTL	RLQDELVTL	0	0	0	0	0	RLQDELVTL	PEPLIST	0.238053	0.056	0.1415	0.163	10816	<=	SB
	1	HLA-E*01:01	RLQEELEKL	RLQEELEKL	0	0	0	0	0	RLQEELEKL	PEPLIST	0.095855	0.305	0.083143	0.957	20336.8	<=	SB		1	HLA-E*01:03	RLQEELEKL	RLQEELEKL	0	0	0	0	0	RLQEELEKL	PEPLIST	0.095855	0.305	0.083143	0.957	20336.8	<=	SB
	1	HLA-E*01:01	RLWGEPVNL	RLWGEPVNL	0	0	0	0	0	RLWGEPVNL	PEPLIST	0.125335	0.197	0.105902	0.449	15897.9	<=	SB		1	HLA-E*01:03	RLWGEPVNL	RLWGEPVNL	0	0	0	0	0	RLWGEPVNL	PEPLIST	0.125335	0.197	0.105902	0.449	15897.9	<=	SB
	1	HLA-E*01:01	RLWPKIQGL	RLWPKIQGL	0	0	0	0	0	RLWPKIQGL	PEPLIST	0.301583	0.028	0.154783	0.12	9368.05	<=	SB		1	HLA-E*01:03	RLWPKIQGL	RLWPKIQGL	0	0	0	0	0	RLWPKIQGL	PEPLIST	0.301583	0.028	0.154783	0.12	9368.05	<=	SB
	1	HLA-E*01:01	RLYDPASGTISL	RLYDPTISL	0	5	3	0	0	RLYDPASGTISL	PEPLIST	0.044092	0.933	0.073191	1.351	22648.9	<=	WB		1	HLA-E*01:03	RLYDPASGTISL	RLYDPTISL	0	5	3	0	0	RLYDPASGTISL	PEPLIST	0.044092	0.933	0.073191	1.351	22648.9	<=	WB
	1	HLA-E*01:01	RLYQGINQL	RLYQGINQL	0	0	0	0	0	RLYQGINQL	PEPLIST	0.260078	0.046	0.132458	0.197	11927.6	<=	SB		1	HLA-E*01:03	RLYQGINQL	RLYQGINQL	0	0	0	0	0	RLYQGINQL	PEPLIST	0.260078	0.046	0.132458	0.197	11927.6	<=	SB
	1	HLA-E*01:01	RMAPALSGA	RMAPALSGA	0	0	0	0	0	RMAPALSGA	PEPLIST	0.003721	7.61	0.048493	3.697	29587.1				1	HLA-E*01:03	RMAPALSGA	RMAPALSGA	0	0	0	0	0	RMAPALSGA	PEPLIST	0.003721	7.61	0.048493	3.697	29587.1
	1	HLA-E*01:01	RMAVLNEQV	RMAVLNEQV	0	0	0	0	0	RMAVLNEQV	PEPLIST	0.032483	1.33	0.080617	1.044	20900.3	<=	WB		1	HLA-E*01:03	RMAVLNEQV	RMAVLNEQV	0	0	0	0	0	RMAVLNEQV	PEPLIST	0.032483	1.33	0.080617	1.044	20900.3	<=	WB
	1	HLA-E*01:01	RMDGAVTSV	RMDGAVTSV	0	0	0	0	0	RMDGAVTSV	PEPLIST	0.085246	0.385	0.117968	0.305	13952.2	<=	SB		1	HLA-E*01:03	RMDGAVTSV	RMDGAVTSV	0	0	0	0	0	RMDGAVTSV	PEPLIST	0.085246	0.385	0.117968	0.305	13952.2	<=	SB
	1	HLA-E*01:01	RMWEDPMGA	RMWEDPMGA	0	0	0	0	0	RMWEDPMGA	PEPLIST	0.003838	7.473	0.036375	6.662	33732.2				1	HLA-E*01:03	RMWEDPMGA	RMWEDPMGA	0	0	0	0	0	RMWEDPMGA	PEPLIST	0.003838	7.473	0.036375	6.662	33732.2
	1	HLA-E*01:01	RTFDETVSTYV	RTFDETVYV	0	7	2	0	0	RTFDETVSTYV	PEPLIST	0.006666	5.258	0.034471	7.354	34434.3				1	HLA-E*01:03	RTFDETVSTYV	RTFDETVYV	0	7	2	0	0	RTFDETVSTYV	PEPLIST	0.006666	5.258	0.034471	7.354	34434.3
	1	HLA-E*01:01	RVIGTLEEV	RVIGTLEEV	0	0	0	0	0	RVIGTLEEV	PEPLIST	0.009342	4.144	0.046845	3.968	30119.4				1	HLA-E*01:03	RVIGTLEEV	RVIGTLEEV	0	0	0	0	0	RVIGTLEEV	PEPLIST	0.009342	4.144	0.046845	3.968	30119.4
	1	HLA-E*01:01	RVLPPSALQSV	RVLPPSQSV	0	6	2	0	0	RVLPPSALQSV	PEPLIST	0.014372	2.922	0.050763	3.345	28869.3				1	HLA-E*01:03	RVLPPSALQSV	RVLPPSQSV	0	6	2	0	0	RVLPPSALQSV	PEPLIST	0.014372	2.922	0.050763	3.345	28869.3
	1	HLA-E*01:01	RVMELFFTV	RVMELFFTV	0	0	0	0	0	RVMELFFTV	PEPLIST	0.054732	0.709	0.094981	0.636	17891.9	<=	WB		1	HLA-E*01:03	RVMELFFTV	RVMELFFTV	0	0	0	0	0	RVMELFFTV	PEPLIST	0.054732	0.709	0.094981	0.636	17891.9	<=	WB
	1	HLA-E*01:01	RVPPPPPIA	RVPPPPPIA	0	0	0	0	0	RVPPPPPIA	PEPLIST	0.084399	0.391	0.077435	1.162	21632.4	<=	SB		1	HLA-E*01:03	RVPPPPPIA	RVPPPPPIA	0	0	0	0	0	RVPPPPPIA	PEPLIST	0.084399	0.391	0.077435	1.162	21632.4	<=	SB
	1	HLA-E*01:01	RVPPPPQSV	RVPPPPQSV	0	0	0	0	0	RVPPPPQSV	PEPLIST	0.508076	0.01	0.164513	0.097	8431.96	<=	SB		1	HLA-E*01:03	RVPPPPQSV	RVPPPPQSV	0	0	0	0	0	RVPPPPQSV	PEPLIST	0.508076	0.01	0.164513	0.097	8431.96	<=	SB
	1	HLA-E*01:01	RVSDINFTL	RVSDINFTL	0	0	0	0	0	RVSDINFTL	PEPLIST	0.230065	0.058	0.147484	0.141	10137.9	<=	SB		1	HLA-E*01:03	RVSDINFTL	RVSDINFTL	0	0	0	0	0	RVSDINFTL	PEPLIST	0.230065	0.058	0.147484	0.141	10137.9	<=	SB
	1	HLA-E*01:01	SADDVIKM	SADDVI-KM	0	0	0	6	1	SADDVIKM	PEPLIST	0.008705	4.372	0.014198	26.241	42879.9				1	HLA-E*01:03	SADDVIKM	SADDVI-KM	0	0	0	6	1	SADDVIKM	PEPLIST	0.008705	4.372	0.014198	26.241	42879.9
	1	HLA-E*01:01	SADEPMTTF	SADEPMTTF	0	0	0	0	0	SADEPMTTF	PEPLIST	0.192086	0.082	0.084729	0.904	19990.8	<=	SB		1	HLA-E*01:03	SADEPMTTF	SADEPMTTF	0	0	0	0	0	SADEPMTTF	PEPLIST	0.192086	0.082	0.084729	0.904	19990.8	<=	SB
	1	HLA-E*01:01	SADFETVRM	SADFETVRM	0	0	0	0	0	SADFETVRM	PEPLIST	0.031295	1.375	0.053534	2.954	28016.6	<=	WB		1	HLA-E*01:03	SADFETVRM	SADFETVRM	0	0	0	0	0	SADFETVRM	PEPLIST	0.031295	1.375	0.053534	2.954	28016.6	<=	WB
	1	HLA-E*01:01	SADKPLSNM	SADKPLSNM	0	0	0	0	0	SADKPLSNM	PEPLIST	0.066797	0.557	0.060515	2.223	25978.4	<=	WB		1	HLA-E*01:03	SADKPLSNM	SADKPLSNM	0	0	0	0	0	SADKPLSNM	PEPLIST	0.066797	0.557	0.060515	2.223	25978.4	<=	WB
	1	HLA-E*01:01	SAIASTKVM	SAIASTKVM	0	0	0	0	0	SAIASTKVM	PEPLIST	0.021986	1.96	0.046446	4.04	30249.7	<=	WB		1	HLA-E*01:03	SAIASTKVM	SAIASTKVM	0	0	0	0	0	SAIASTKVM	PEPLIST	0.021986	1.96	0.046446	4.04	30249.7	<=	WB
	1	HLA-E*01:01	SAIDRIFTL	SAIDRIFTL	0	0	0	0	0	SAIDRIFTL	PEPLIST	0.388662	0.016	0.174929	0.078	7533.27	<=	SB		1	HLA-E*01:03	SAIDRIFTL	SAIDRIFTL	0	0	0	0	0	SAIDRIFTL	PEPLIST	0.388662	0.016	0.174929	0.078	7533.27	<=	SB
	1	HLA-E*01:01	SAQGKPLAL	SAQGKPLAL	0	0	0	0	0	SAQGKPLAL	PEPLIST	0.184292	0.092	0.09222	0.701	18434.5	<=	SB		1	HLA-E*01:03	SAQGKPLAL	SAQGKPLAL	0	0	0	0	0	SAQGKPLAL	PEPLIST	0.184292	0.092	0.09222	0.701	18434.5	<=	SB
	1	HLA-E*01:01	SATSLPQTV	SATSLPQTV	0	0	0	0	0	SATSLPQTV	PEPLIST	0.05323	0.738	0.052051	3.158	28469.8	<=	WB		1	HLA-E*01:03	SATSLPQTV	SATSLPQTV	0	0	0	0	0	SATSLPQTV	PEPLIST	0.05323	0.738	0.052051	3.158	28469.8	<=	WB
	1	HLA-E*01:01	SAYDNVNKV	SAYDNVNKV	0	0	0	0	0	SAYDNVNKV	PEPLIST	0.077212	0.457	0.06216	2.075	25520.1	<=	SB		1	HLA-E*01:03	SAYDNVNKV	SAYDNVNKV	0	0	0	0	0	SAYDNVNKV	PEPLIST	0.077212	0.457	0.06216	2.075	25520.1	<=	SB
	1	HLA-E*01:01	SFLVACVIL	SFLVACVIL	0	0	0	0	0	SFLVACVIL	PEPLIST	0.006799	5.19	0.033565	7.718	34773.6				1	HLA-E*01:03	SFLVACVIL	SFLVACVIL	0	0	0	0	0	SFLVACVIL	PEPLIST	0.006799	5.19	0.033565	7.718	34773.6
	1	HLA-E*01:01	SIADKIQQI	SIADKIQQI	0	0	0	0	0	SIADKIQQI	PEPLIST	0.131065	0.184	0.076744	1.189	21794.8	<=	SB		1	HLA-E*01:03	SIADKIQQI	SIADKIQQI	0	0	0	0	0	SIADKIQQI	PEPLIST	0.131065	0.184	0.076744	1.189	21794.8	<=	SB
	1	HLA-E*01:01	SIAEVVHQL	SIAEVVHQL	0	0	0	0	0	SIAEVVHQL	PEPLIST	0.271849	0.039	0.111018	0.381	15041.8	<=	SB		1	HLA-E*01:03	SIAEVVHQL	SIAEVVHQL	0	0	0	0	0	SIAEVVHQL	PEPLIST	0.271849	0.039	0.111018	0.381	15041.8	<=	SB
	1	HLA-E*01:01	SIAQIISSV	SIAQIISSV	0	0	0	0	0	SIAQIISSV	PEPLIST	0.014224	2.946	0.045623	4.202	30520.3				1	HLA-E*01:03	SIAQIISSV	SIAQIISSV	0	0	0	0	0	SIAQIISSV	PEPLIST	0.014224	2.946	0.045623	4.202	30520.3
	1	HLA-E*01:01	SIIGRLLEV	SIIGRLLEV	0	0	0	0	0	SIIGRLLEV	PEPLIST	0.069541	0.531	0.093322	0.675	18216	<=	WB		1	HLA-E*01:03	SIIGRLLEV	SIIGRLLEV	0	0	0	0	0	SIIGRLLEV	PEPLIST	0.069541	0.531	0.093322	0.675	18216	<=	WB
	1	HLA-E*01:01	SIIQRLLEV	SIIQRLLEV	0	0	0	0	0	SIIQRLLEV	PEPLIST	0.071719	0.509	0.089109	0.79	19065.6	<=	WB		1	HLA-E*01:03	SIIQRLLEV	SIIQRLLEV	0	0	0	0	0	SIIQRLLEV	PEPLIST	0.071719	0.509	0.089109	0.79	19065.6	<=	WB
	1	HLA-E*01:01	SILEDPPSI	SILEDPPSI	0	0	0	0	0	SILEDPPSI	PEPLIST	0.052699	0.748	0.052015	3.163	28480.9	<=	WB		1	HLA-E*01:03	SILEDPPSI	SILEDPPSI	0	0	0	0	0	SILEDPPSI	PEPLIST	0.052699	0.748	0.052015	3.163	28480.9	<=	WB
	1	HLA-E*01:01	SIMTFIKEL	SIMTFIKEL	0	0	0	0	0	SIMTFIKEL	PEPLIST	0.067343	0.552	0.082	0.996	20589.9	<=	WB		1	HLA-E*01:03	SIMTFIKEL	SIMTFIKEL	0	0	0	0	0	SIMTFIKEL	PEPLIST	0.067343	0.552	0.082	0.996	20589.9	<=	WB
	1	HLA-E*01:01	SIYNGDMEKI	SIYNGMEKI	0	5	1	0	0	SIYNGDMEKI	PEPLIST	0.001862	11.149	0.031569	8.613	35532.7				1	HLA-E*01:03	SIYNGDMEKI	SIYNGMEKI	0	5	1	0	0	SIYNGDMEKI	PEPLIST	0.001862	11.149	0.031569	8.613	35532.7
	1	HLA-E*01:01	SLADDSVLERL	SLADDSVLL	0	8	2	0	0	SLADDSVLERL	PEPLIST	0.00749	4.863	0.033903	7.578	34646.6				1	HLA-E*01:03	SLADDSVLERL	SLADDSVLL	0	8	2	0	0	SLADDSVLERL	PEPLIST	0.00749	4.863	0.033903	7.578	34646.6
	1	HLA-E*01:01	SLADFMQEV	SLADFMQEV	0	0	0	0	0	SLADFMQEV	PEPLIST	0.028637	1.495	0.07353	1.334	22566	<=	WB		1	HLA-E*01:03	SLADFMQEV	SLADFMQEV	0	0	0	0	0	SLADFMQEV	PEPLIST	0.028637	1.495	0.07353	1.334	22566	<=	WB
	1	HLA-E*01:01	SLAEFVQSL	SLAEFVQSL	0	0	0	0	0	SLAEFVQSL	PEPLIST	0.270577	0.039	0.161724	0.104	8690.28	<=	SB		1	HLA-E*01:03	SLAEFVQSL	SLAEFVQSL	0	0	0	0	0	SLAEFVQSL	PEPLIST	0.270577	0.039	0.161724	0.104	8690.28	<=	SB
	1	HLA-E*01:01	SLAEVLQQL	SLAEVLQQL	0	0	0	0	0	SLAEVLQQL	PEPLIST	0.221485	0.062	0.11528	0.335	14363.9	<=	SB		1	HLA-E*01:03	SLAEVLQQL	SLAEVLQQL	0	0	0	0	0	SLAEVLQQL	PEPLIST	0.221485	0.062	0.11528	0.335	14363.9	<=	SB
	1	HLA-E*01:01	SLAEYIDMI	SLAEYIDMI	0	0	0	0	0	SLAEYIDMI	PEPLIST	0.025385	1.68	0.086467	0.859	19618.4	<=	WB		1	HLA-E*01:03	SLAEYIDMI	SLAEYIDMI	0	0	0	0	0	SLAEYIDMI	PEPLIST	0.025385	1.68	0.086467	0.859	19618.4	<=	WB
	1	HLA-E*01:01	SLAKIYTEA	SLAKIYTEA	0	0	0	0	0	SLAKIYTEA	PEPLIST	0.004557	6.739	0.030048	9.395	36122.3				1	HLA-E*01:03	SLAKIYTEA	SLAKIYTEA	0	0	0	0	0	SLAKIYTEA	PEPLIST	0.004557	6.739	0.030048	9.395	36122.3
	1	HLA-E*01:01	SLAQMVSGL	SLAQMVSGL	0	0	0	0	0	SLAQMVSGL	PEPLIST	0.04571	0.89	0.083815	0.935	20189.5	<=	WB		1	HLA-E*01:03	SLAQMVSGL	SLAQMVSGL	0	0	0	0	0	SLAQMVSGL	PEPLIST	0.04571	0.89	0.083815	0.935	20189.5	<=	WB
	1	HLA-E*01:01	SLAQYLINA	SLAQYLINA	0	0	0	0	0	SLAQYLINA	PEPLIST	0.001271	13.49	0.021753	15.605	39514.2				1	HLA-E*01:03	SLAQYLINA	SLAQYLINA	0	0	0	0	0	SLAQYLINA	PEPLIST	0.001271	13.49	0.021753	15.605	39514.2
	1	HLA-E*01:01	SLAQYLINV	SLAQYLINV	0	0	0	0	0	SLAQYLINV	PEPLIST	0.016425	2.598	0.053482	2.96	28032.4				1	HLA-E*01:03	SLAQYLINV	SLAQYLINV	0	0	0	0	0	SLAQYLINV	PEPLIST	0.016425	2.598	0.053482	2.96	28032.4
	1	HLA-E*01:01	SLDALLSQV	SLDALLSQV	0	0	0	0	0	SLDALLSQV	PEPLIST	0.024706	1.732	0.059665	2.3	26218.4	<=	WB		1	HLA-E*01:03	SLDALLSQV	SLDALLSQV	0	0	0	0	0	SLDALLSQV	PEPLIST	0.024706	1.732	0.059665	2.3	26218.4	<=	WB
	1	HLA-E*01:01	SLDKFLASV	SLDKFLASV	0	0	0	0	0	SLDKFLASV	PEPLIST	0.045954	0.885	0.085416	0.885	19842.8	<=	WB		1	HLA-E*01:03	SLDKFLASV	SLDKFLASV	0	0	0	0	0	SLDKFLASV	PEPLIST	0.045954	0.885	0.085416	0.885	19842.8	<=	WB
	1	HLA-E*01:01	SLDKTSPEM	SLDKTSPEM	0	0	0	0	0	SLDKTSPEM	PEPLIST	0.130516	0.185	0.109008	0.403	15372.5	<=	SB		1	HLA-E*01:03	SLDKTSPEM	SLDKTSPEM	0	0	0	0	0	SLDKTSPEM	PEPLIST	0.130516	0.185	0.109008	0.403	15372.5	<=	SB
	1	HLA-E*01:01	SLDQPTQTV	SLDQPTQTV	0	0	0	0	0	SLDQPTQTV	PEPLIST	0.119334	0.216	0.089527	0.778	18979.5	<=	SB		1	HLA-E*01:03	SLDQPTQTV	SLDQPTQTV	0	0	0	0	0	SLDQPTQTV	PEPLIST	0.119334	0.216	0.089527	0.778	18979.5	<=	SB
	1	HLA-E*01:01	SLEELLHYV	SLEELLHYV	0	0	0	0	0	SLEELLHYV	PEPLIST	0.029465	1.455	0.059865	2.282	26161.7	<=	WB		1	HLA-E*01:03	SLEELLHYV	SLEELLHYV	0	0	0	0	0	SLEELLHYV	PEPLIST	0.029465	1.455	0.059865	2.282	26161.7	<=	WB
	1	HLA-E*01:01	SLFAGGMLRV	SLFGGMLRV	0	3	1	0	0	SLFAGGMLRV	PEPLIST	0.002784	8.982	0.037116	6.403	33462.9				1	HLA-E*01:03	SLFAGGMLRV	SLFGGMLRV	0	3	1	0	0	SLFAGGMLRV	PEPLIST	0.002784	8.982	0.037116	6.403	33462.9
	1	HLA-E*01:01	SLFDIISKI	SLFDIISKI	0	0	0	0	0	SLFDIISKI	PEPLIST	0.080346	0.428	0.060629	2.213	25946.3	<=	SB		1	HLA-E*01:03	SLFDIISKI	SLFDIISKI	0	0	0	0	0	SLFDIISKI	PEPLIST	0.080346	0.428	0.060629	2.213	25946.3	<=	SB
	1	HLA-E*01:01	SLFERLVVL	SLFERLVVL	0	0	0	0	0	SLFERLVVL	PEPLIST	0.362737	0.018	0.203008	0.045	5559.57	<=	SB		1	HLA-E*01:03	SLFERLVVL	SLFERLVVL	0	0	0	0	0	SLFERLVVL	PEPLIST	0.362737	0.018	0.203008	0.045	5559.57	<=	SB
	1	HLA-E*01:01	SLFPGQVVI	SLFPGQVVI	0	0	0	0	0	SLFPGQVVI	PEPLIST	0.181155	0.097	0.132994	0.195	11858.6	<=	SB		1	HLA-E*01:03	SLFPGQVVI	SLFPGQVVI	0	0	0	0	0	SLFPGQVVI	PEPLIST	0.181155	0.097	0.132994	0.195	11858.6	<=	SB
	1	HLA-E*01:01	SLHDMKTVV	SLHDMKTVV	0	0	0	0	0	SLHDMKTVV	PEPLIST	0.023944	1.799	0.058522	2.403	26544.7	<=	WB		1	HLA-E*01:03	SLHDMKTVV	SLHDMKTVV	0	0	0	0	0	SLHDMKTVV	PEPLIST	0.023944	1.799	0.058522	2.403	26544.7	<=	WB
	1	HLA-E*01:01	SLIEDLILL	SLIEDLILL	0	0	0	0	0	SLIEDLILL	PEPLIST	0.103868	0.271	0.099143	0.556	17104.1	<=	SB		1	HLA-E*01:03	SLIEDLILL	SLIEDLILL	0	0	0	0	0	SLIEDLILL	PEPLIST	0.103868	0.271	0.099143	0.556	17104.1	<=	SB
	1	HLA-E*01:01	SLINVGLISV	SLINGLISV	0	4	1	0	0	SLINVGLISV	PEPLIST	0.001153	14.087	0.026193	11.81	37660.8				1	HLA-E*01:03	SLINVGLISV	SLINGLISV	0	4	1	0	0	SLINVGLISV	PEPLIST	0.001153	14.087	0.026193	11.81	37660.8
	1	HLA-E*01:01	SLITRLLEV	SLITRLLEV	0	0	0	0	0	SLITRLLEV	PEPLIST	0.088455	0.361	0.104659	0.468	16113.1	<=	SB		1	HLA-E*01:03	SLITRLLEV	SLITRLLEV	0	0	0	0	0	SLITRLLEV	PEPLIST	0.088455	0.361	0.104659	0.468	16113.1	<=	SB
	1	HLA-E*01:01	SLLDEFYKL	SLLDEFYKL	0	0	0	0	0	SLLDEFYKL	PEPLIST	0.120889	0.211	0.086301	0.863	19653.7	<=	SB		1	HLA-E*01:03	SLLDEFYKL	SLLDEFYKL	0	0	0	0	0	SLLDEFYKL	PEPLIST	0.120889	0.211	0.086301	0.863	19653.7	<=	SB
	1	HLA-E*01:01	SLLDIIEKV	SLLDIIEKV	0	0	0	0	0	SLLDIIEKV	PEPLIST	0.03574	1.202	0.03767	6.207	33262.9	<=	WB		1	HLA-E*01:03	SLLDIIEKV	SLLDIIEKV	0	0	0	0	0	SLLDIIEKV	PEPLIST	0.03574	1.202	0.03767	6.207	33262.9	<=	WB
	1	HLA-E*01:01	SLLDKIIGA	SLLDKIIGA	0	0	0	0	0	SLLDKIIGA	PEPLIST	0.004711	6.607	0.026063	11.902	37713.8				1	HLA-E*01:03	SLLDKIIGA	SLLDKIIGA	0	0	0	0	0	SLLDKIIGA	PEPLIST	0.004711	6.607	0.026063	11.902	37713.8
	1	HLA-E*01:01	SLLDLEQKL	SLLDLEQKL	0	0	0	0	0	SLLDLEQKL	PEPLIST	0.071848	0.508	0.051103	3.296	28763.3	<=	WB		1	HLA-E*01:03	SLLDLEQKL	SLLDLEQKL	0	0	0	0	0	SLLDLEQKL	PEPLIST	0.071848	0.508	0.051103	3.296	28763.3	<=	WB
	1	HLA-E*01:01	SLLDLPLSL	SLLDLPLSL	0	0	0	0	0	SLLDLPLSL	PEPLIST	0.255707	0.05	0.121449	0.276	13436.5	<=	SB		1	HLA-E*01:03	SLLDLPLSL	SLLDLPLSL	0	0	0	0	0	SLLDLPLSL	PEPLIST	0.255707	0.05	0.121449	0.276	13436.5	<=	SB
	1	HLA-E*01:01	SLLDRFLATV	SLLDRFLTV	0	7	1	0	0	SLLDRFLATV	PEPLIST	0.008106	4.602	0.058362	2.417	26590.6				1	HLA-E*01:03	SLLDRFLATV	SLLDRFLTV	0	7	1	0	0	SLLDRFLATV	PEPLIST	0.008106	4.602	0.058362	2.417	26590.6
	1	HLA-E*01:01	SLLEKSLGL	SLLEKSLGL	0	0	0	0	0	SLLEKSLGL	PEPLIST	0.204305	0.072	0.146194	0.145	10280.4	<=	SB		1	HLA-E*01:03	SLLEKSLGL	SLLEKSLGL	0	0	0	0	0	SLLEKSLGL	PEPLIST	0.204305	0.072	0.146194	0.145	10280.4	<=	SB
	1	HLA-E*01:01	SLLENLEKI	SLLENLEKI	0	0	0	0	0	SLLENLEKI	PEPLIST	0.065544	0.569	0.078236	1.131	21445.8	<=	WB		1	HLA-E*01:03	SLLENLEKI	SLLENLEKI	0	0	0	0	0	SLLENLEKI	PEPLIST	0.065544	0.569	0.078236	1.131	21445.8	<=	WB
	1	HLA-E*01:01	SLLHLGALYGI	SLLHLGALI	0	8	2	0	0	SLLHLGALYGI	PEPLIST	0.000245	25.31	0.023417	13.967	38809.2				1	HLA-E*01:03	SLLHLGALYGI	SLLHLGALI	0	8	2	0	0	SLLHLGALYGI	PEPLIST	0.000245	25.31	0.023417	13.967	38809.2
	1	HLA-E*01:01	SLLPFLKAV	SLLPFLKAV	0	0	0	0	0	SLLPFLKAV	PEPLIST	0.018211	2.369	0.049051	3.606	29409				1	HLA-E*01:03	SLLPFLKAV	SLLPFLKAV	0	0	0	0	0	SLLPFLKAV	PEPLIST	0.018211	2.369	0.049051	3.606	29409
	1	HLA-E*01:01	SLLPPDALVGL	SLPDALVGL	0	2	2	0	0	SLLPPDALVGL	PEPLIST	0.032802	1.318	0.063508	1.966	25150.6	<=	WB		1	HLA-E*01:03	SLLPPDALVGL	SLPDALVGL	0	2	2	0	0	SLLPPDALVGL	PEPLIST	0.032802	1.318	0.063508	1.966	25150.6	<=	WB
	1	HLA-E*01:01	SLLQHLIGL	SLLQHLIGL	0	0	0	0	0	SLLQHLIGL	PEPLIST	0.076732	0.462	0.090807	0.741	18718.5	<=	SB		1	HLA-E*01:03	SLLQHLIGL	SLLQHLIGL	0	0	0	0	0	SLLQHLIGL	PEPLIST	0.076732	0.462	0.090807	0.741	18718.5	<=	SB
	1	HLA-E*01:01	SLLSHVEQL	SLLSHVEQL	0	0	0	0	0	SLLSHVEQL	PEPLIST	0.21855	0.063	0.123186	0.261	13186.3	<=	SB		1	HLA-E*01:03	SLLSHVEQL	SLLSHVEQL	0	0	0	0	0	SLLSHVEQL	PEPLIST	0.21855	0.063	0.123186	0.261	13186.3	<=	SB
	1	HLA-E*01:01	SLMDPDTKL	SLMDPDTKL	0	0	0	0	0	SLMDPDTKL	PEPLIST	0.158639	0.131	0.082427	0.981	20495	<=	SB		1	HLA-E*01:03	SLMDPDTKL	SLMDPDTKL	0	0	0	0	0	SLMDPDTKL	PEPLIST	0.158639	0.131	0.082427	0.981	20495	<=	SB
	1	HLA-E*01:01	SLMTKEISSV	SLMTKISSV	0	5	1	0	0	SLMTKEISSV	PEPLIST	0.004119	7.153	0.041139	5.188	32037.5				1	HLA-E*01:03	SLMTKEISSV	SLMTKISSV	0	5	1	0	0	SLMTKEISSV	PEPLIST	0.004119	7.153	0.041139	5.188	32037.5
	1	HLA-E*01:01	SLNGRIINV	SLNGRIINV	0	0	0	0	0	SLNGRIINV	PEPLIST	0.059679	0.637	0.076124	1.216	21941.5	<=	WB		1	HLA-E*01:03	SLNGRIINV	SLNGRIINV	0	0	0	0	0	SLNGRIINV	PEPLIST	0.059679	0.637	0.076124	1.216	21941.5	<=	WB
	1	HLA-E*01:01	SLQDMASRV	SLQDMASRV	0	0	0	0	0	SLQDMASRV	PEPLIST	0.007778	4.741	0.042788	4.79	31471				1	HLA-E*01:03	SLQDMASRV	SLQDMASRV	0	0	0	0	0	SLQDMASRV	PEPLIST	0.007778	4.741	0.042788	4.79	31471
	1	HLA-E*01:01	SLQEEIAFL	SLQEEIAFL	0	0	0	0	0	SLQEEIAFL	PEPLIST	0.110705	0.245	0.12989	0.213	12263.7	<=	SB		1	HLA-E*01:03	SLQEEIAFL	SLQEEIAFL	0	0	0	0	0	SLQEEIAFL	PEPLIST	0.110705	0.245	0.12989	0.213	12263.7	<=	SB
	1	HLA-E*01:01	SLQSTILGV	SLQSTILGV	0	0	0	0	0	SLQSTILGV	PEPLIST	0.008227	4.55	0.044233	4.475	30982.8				1	HLA-E*01:03	SLQSTILGV	SLQSTILGV	0	0	0	0	0	SLQSTILGV	PEPLIST	0.008227	4.55	0.044233	4.475	30982.8
	1	HLA-E*01:01	SLSEKTVLL	SLSEKTVLL	0	0	0	0	0	SLSEKTVLL	PEPLIST	0.484609	0.01	0.259521	0.019	3016.4	<=	SB		1	HLA-E*01:03	SLSEKTVLL	SLSEKTVLL	0	0	0	0	0	SLSEKTVLL	PEPLIST	0.484609	0.01	0.259521	0.019	3016.4	<=	SB
	1	HLA-E*01:01	SLTGHISTV	SLTGHISTV	0	0	0	0	0	SLTGHISTV	PEPLIST	0.038468	1.097	0.069091	1.581	23676.3	<=	WB		1	HLA-E*01:03	SLTGHISTV	SLTGHISTV	0	0	0	0	0	SLTGHISTV	PEPLIST	0.038468	1.097	0.069091	1.581	23676.3	<=	WB
	1	HLA-E*01:01	SLTGRLDEV	SLTGRLDEV	0	0	0	0	0	SLTGRLDEV	PEPLIST	0.006955	5.11	0.042876	4.771	31441				1	HLA-E*01:03	SLTGRLDEV	SLTGRLDEV	0	0	0	0	0	SLTGRLDEV	PEPLIST	0.006955	5.11	0.042876	4.771	31441
	1	HLA-E*01:01	SLYEMVSRV	SLYEMVSRV	0	0	0	0	0	SLYEMVSRV	PEPLIST	0.044152	0.931	0.063425	1.972	25173.2	<=	WB		1	HLA-E*01:03	SLYEMVSRV	SLYEMVSRV	0	0	0	0	0	SLYEMVSRV	PEPLIST	0.044152	0.931	0.063425	1.972	25173.2	<=	WB
	1	HLA-E*01:01	SMADIPLGFGV	SMADIPLGV	0	7	2	0	0	SMADIPLGFGV	PEPLIST	0.001704	11.67	0.028594	10.244	36695.1				1	HLA-E*01:03	SMADIPLGFGV	SMADIPLGV	0	7	2	0	0	SMADIPLGFGV	PEPLIST	0.001704	11.67	0.028594	10.244	36695.1
	1	HLA-E*01:01	SMAEVDAAMAA	SMAEVDAAA	0	7	2	0	0	SMAEVDAAMAA	PEPLIST	0.000179	27.957	0.013336	27.996	43281.7				1	HLA-E*01:03	SMAEVDAAMAA	SMAEVDAAA	0	7	2	0	0	SMAEVDAAMAA	PEPLIST	0.000179	27.957	0.013336	27.996	43281.7
	1	HLA-E*01:01	SMAKAITGV	SMAKAITGV	0	0	0	0	0	SMAKAITGV	PEPLIST	0.03144	1.369	0.082703	0.972	20433.9	<=	WB		1	HLA-E*01:03	SMAKAITGV	SMAKAITGV	0	0	0	0	0	SMAKAITGV	PEPLIST	0.03144	1.369	0.082703	0.972	20433.9	<=	WB
	1	HLA-E*01:01	SMFGKLIDL	SMFGKLIDL	0	0	0	0	0	SMFGKLIDL	PEPLIST	0.172941	0.109	0.163335	0.1	8540.12	<=	SB		1	HLA-E*01:03	SMFGKLIDL	SMFGKLIDL	0	0	0	0	0	SMFGKLIDL	PEPLIST	0.172941	0.109	0.163335	0.1	8540.12	<=	SB
	1	HLA-E*01:01	SMLEDVQRA	SMLEDVQRA	0	0	0	0	0	SMLEDVQRA	PEPLIST	0.00644	5.374	0.021446	15.922	39645.7				1	HLA-E*01:03	SMLEDVQRA	SMLEDVQRA	0	0	0	0	0	SMLEDVQRA	PEPLIST	0.00644	5.374	0.021446	15.922	39645.7
	1	HLA-E*01:01	SMLPTLREA	SMLPTLREA	0	0	0	0	0	SMLPTLREA	PEPLIST	0.01337	3.107	0.035928	6.816	33895.8				1	HLA-E*01:03	SMLPTLREA	SMLPTLREA	0	0	0	0	0	SMLPTLREA	PEPLIST	0.01337	3.107	0.035928	6.816	33895.8
	1	HLA-E*01:01	SMMDPNHFL	SMMDPNHFL	0	0	0	0	0	SMMDPNHFL	PEPLIST	0.398822	0.015	0.266653	0.017	2792.39	<=	SB		1	HLA-E*01:03	SMMDPNHFL	SMMDPNHFL	0	0	0	0	0	SMMDPNHFL	PEPLIST	0.398822	0.015	0.266653	0.017	2792.39	<=	SB
	1	HLA-E*01:01	SMMDVDHQI	SMMDVDHQI	0	0	0	0	0	SMMDVDHQI	PEPLIST	0.133806	0.178	0.108007	0.418	15539.9	<=	SB		1	HLA-E*01:03	SMMDVDHQI	SMMDVDHQI	0	0	0	0	0	SMMDVDHQI	PEPLIST	0.133806	0.178	0.108007	0.418	15539.9	<=	SB
	1	HLA-E*01:01	SMTNFISGL	SMTNFISGL	0	0	0	0	0	SMTNFISGL	PEPLIST	0.051736	0.767	0.117173	0.314	14072.7	<=	WB		1	HLA-E*01:03	SMTNFISGL	SMTNFISGL	0	0	0	0	0	SMTNFISGL	PEPLIST	0.051736	0.767	0.117173	0.314	14072.7	<=	WB
	1	HLA-E*01:01	SMVDVVMLL	SMVDVVMLL	0	0	0	0	0	SMVDVVMLL	PEPLIST	0.167507	0.117	0.140565	0.167	10926	<=	SB		1	HLA-E*01:03	SMVDVVMLL	SMVDVVMLL	0	0	0	0	0	SMVDVVMLL	PEPLIST	0.167507	0.117	0.140565	0.167	10926	<=	SB
	1	HLA-E*01:01	SMYGVDLHHA	SMYGDLHHA	0	4	1	0	0	SMYGVDLHHA	PEPLIST	0.001988	10.785	0.020958	16.458	39855.6				1	HLA-E*01:03	SMYGVDLHHA	SMYGDLHHA	0	4	1	0	0	SMYGVDLHHA	PEPLIST	0.001988	10.785	0.020958	16.458	39855.6
	1	HLA-E*01:01	SMYGVDLHKA	SMYGDLHKA	0	4	1	0	0	SMYGVDLHKA	PEPLIST	0.001777	11.429	0.018462	19.442	40946.6				1	HLA-E*01:03	SMYGVDLHKA	SMYGDLHKA	0	4	1	0	0	SMYGVDLHKA	PEPLIST	0.001777	11.429	0.018462	19.442	40946.6
	1	HLA-E*01:01	SPPPPPPPP	SPPPPPPPP	0	0	0	0	0	SPPPPPPPP	PEPLIST	0.004756	6.569	0.01579	23.295	42147.7				1	HLA-E*01:03	SPPPPPPPP	SPPPPPPPP	0	0	0	0	0	SPPPPPPPP	PEPLIST	0.004756	6.569	0.01579	23.295	42147.7
	1	HLA-E*01:01	SQDPTMIGV	SQDPTMIGV	0	0	0	0	0	SQDPTMIGV	PEPLIST	0.082823	0.404	0.077339	1.166	21654.9	<=	SB		1	HLA-E*01:03	SQDPTMIGV	SQDPTMIGV	0	0	0	0	0	SQDPTMIGV	PEPLIST	0.082823	0.404	0.077339	1.166	21654.9	<=	SB
	1	HLA-E*01:01	SQYPEIIFL	SQYPEIIFL	0	0	0	0	0	SQYPEIIFL	PEPLIST	0.44651	0.012	0.190243	0.055	6382.98	<=	SB		1	HLA-E*01:03	SQYPEIIFL	SQYPEIIFL	0	0	0	0	0	SQYPEIIFL	PEPLIST	0.44651	0.012	0.190243	0.055	6382.98	<=	SB
	1	HLA-E*01:01	SVDSKPPVI	SVDSKPPVI	0	0	0	0	0	SVDSKPPVI	PEPLIST	0.204319	0.072	0.10526	0.459	16008.7	<=	SB		1	HLA-E*01:03	SVDSKPPVI	SVDSKPPVI	0	0	0	0	0	SVDSKPPVI	PEPLIST	0.204319	0.072	0.10526	0.459	16008.7	<=	SB
	1	HLA-E*01:01	SVHPSIPASVHA	SSIPASVHA	0	1	3	0	0	SVHPSIPASVHA	PEPLIST	0.00013	30.933	0.014442	25.749	42766.9				1	HLA-E*01:03	SVHPSIPASVHA	SSIPASVHA	0	1	3	0	0	SVHPSIPASVHA	PEPLIST	0.00013	30.933	0.014442	25.749	42766.9
	1	HLA-E*01:01	SVIEQLFFV	SVIEQLFFV	0	0	0	0	0	SVIEQLFFV	PEPLIST	0.019628	2.209	0.067739	1.67	24025.2				1	HLA-E*01:03	SVIEQLFFV	SVIEQLFFV	0	0	0	0	0	SVIEQLFFV	PEPLIST	0.019628	2.209	0.067739	1.67	24025.2
	1	HLA-E*01:01	SVLGKVNEI	SVLGKVNEI	0	0	0	0	0	SVLGKVNEI	PEPLIST	0.069776	0.528	0.072703	1.375	22768.8	<=	WB		1	HLA-E*01:03	SVLGKVNEI	SVLGKVNEI	0	0	0	0	0	SVLGKVNEI	PEPLIST	0.069776	0.528	0.072703	1.375	22768.8	<=	WB
	1	HLA-E*01:01	SVLKSIQEV	SVLKSIQEV	0	0	0	0	0	SVLKSIQEV	PEPLIST	0.029471	1.455	0.047312	3.891	29967.6	<=	WB		1	HLA-E*01:03	SVLKSIQEV	SVLKSIQEV	0	0	0	0	0	SVLKSIQEV	PEPLIST	0.029471	1.455	0.047312	3.891	29967.6	<=	WB
	1	HLA-E*01:01	TIDPNTRTL	TIDPNTRTL	0	0	0	0	0	TIDPNTRTL	PEPLIST	0.295856	0.03	0.126724	0.235	12691	<=	SB		1	HLA-E*01:03	TIDPNTRTL	TIDPNTRTL	0	0	0	0	0	TIDPNTRTL	PEPLIST	0.295856	0.03	0.126724	0.235	12691	<=	SB
	1	HLA-E*01:01	TIIDKSKSV	TIIDKSKSV	0	0	0	0	0	TIIDKSKSV	PEPLIST	0.017779	2.417	0.032751	8.062	35081.2				1	HLA-E*01:03	TIIDKSKSV	TIIDKSKSV	0	0	0	0	0	TIIDKSKSV	PEPLIST	0.017779	2.417	0.032751	8.062	35081.2
	1	HLA-E*01:01	TLADIIARL	TLADIIARL	0	0	0	0	0	TLADIIARL	PEPLIST	0.095905	0.305	0.087557	0.831	19388.4	<=	SB		1	HLA-E*01:03	TLADIIARL	TLADIIARL	0	0	0	0	0	TLADIIARL	PEPLIST	0.095905	0.305	0.087557	0.831	19388.4	<=	SB
	1	HLA-E*01:01	TLADVLYHV	TLADVLYHV	0	0	0	0	0	TLADVLYHV	PEPLIST	0.015878	2.684	0.04396	4.532	31074.5				1	HLA-E*01:03	TLADVLYHV	TLADVLYHV	0	0	0	0	0	TLADVLYHV	PEPLIST	0.015878	2.684	0.04396	4.532	31074.5
	1	HLA-E*01:01	TLAETLVNL	TLAETLVNL	0	0	0	0	0	TLAETLVNL	PEPLIST	0.106133	0.263	0.109429	0.398	15302.6	<=	SB		1	HLA-E*01:03	TLAETLVNL	TLAETLVNL	0	0	0	0	0	TLAETLVNL	PEPLIST	0.106133	0.263	0.109429	0.398	15302.6	<=	SB
	1	HLA-E*01:01	TLAGVIDLA	TLAGVIDLA	0	0	0	0	0	TLAGVIDLA	PEPLIST	0.00051	19.611	0.014321	25.986	42822.9				1	HLA-E*01:03	TLAGVIDLA	TLAGVIDLA	0	0	0	0	0	TLAGVIDLA	PEPLIST	0.00051	19.611	0.014321	25.986	42822.9
	1	HLA-E*01:01	TLAKYLMEL	TLAKYLMEL	0	0	0	0	0	TLAKYLMEL	PEPLIST	0.097571	0.296	0.116709	0.319	14143.5	<=	SB		1	HLA-E*01:03	TLAKYLMEL	TLAKYLMEL	0	0	0	0	0	TLAKYLMEL	PEPLIST	0.097571	0.296	0.116709	0.319	14143.5	<=	SB
	1	HLA-E*01:01	TLAQRVKEV	TLAQRVKEV	0	0	0	0	0	TLAQRVKEV	PEPLIST	0.030859	1.391	0.048053	3.77	29728.3	<=	WB		1	HLA-E*01:03	TLAQRVKEV	TLAQRVKEV	0	0	0	0	0	TLAQRVKEV	PEPLIST	0.030859	1.391	0.048053	3.77	29728.3	<=	WB
	1	HLA-E*01:01	TLDEKIEKV	TLDEKIEKV	0	0	0	0	0	TLDEKIEKV	PEPLIST	0.078209	0.448	0.053799	2.923	27936.4	<=	SB		1	HLA-E*01:03	TLDEKIEKV	TLDEKIEKV	0	0	0	0	0	TLDEKIEKV	PEPLIST	0.078209	0.448	0.053799	2.923	27936.4	<=	SB
	1	HLA-E*01:01	TLIDLPGITKV	TLIDLPTKV	0	6	2	0	0	TLIDLPGITKV	PEPLIST	0.001735	11.568	0.013686	27.293	43118.1				1	HLA-E*01:03	TLIDLPGITKV	TLIDLPTKV	0	6	2	0	0	TLIDLPGITKV	PEPLIST	0.001735	11.568	0.013686	27.293	43118.1
	1	HLA-E*01:01	TLISELVQA	TLISELVQA	0	0	0	0	0	TLISELVQA	PEPLIST	0.001475	12.551	0.016386	22.345	41876.7				1	HLA-E*01:03	TLISELVQA	TLISELVQA	0	0	0	0	0	TLISELVQA	PEPLIST	0.001475	12.551	0.016386	22.345	41876.7
	1	HLA-E*01:01	TLITDGMRSV	TLIDGMRSV	0	3	1	0	0	TLITDGMRSV	PEPLIST	0.001	14.971	0.02376	13.686	38665.4				1	HLA-E*01:03	TLITDGMRSV	TLIDGMRSV	0	3	1	0	0	TLITDGMRSV	PEPLIST	0.001	14.971	0.02376	13.686	38665.4
	1	HLA-E*01:01	TLLEDGTFKV	TLLEGTFKV	0	4	1	0	0	TLLEDGTFKV	PEPLIST	0.000597	18.476	0.019357	18.316	40552				1	HLA-E*01:03	TLLEDGTFKV	TLLEGTFKV	0	4	1	0	0	TLLEDGTFKV	PEPLIST	0.000597	18.476	0.019357	18.316	40552
	1	HLA-E*01:01	TLLHAGGLARA	TLAGGLARA	0	2	2	0	0	TLLHAGGLARA	PEPLIST	4.5e-05	42	0.007361	48.072	46172.2				1	HLA-E*01:03	TLLHAGGLARA	TLAGGLARA	0	2	2	0	0	TLLHAGGLARA	PEPLIST	4.5e-05	42	0.007361	48.072	46172.2
	1	HLA-E*01:01	TLNDIMTRV	TLNDIMTRV	0	0	0	0	0	TLNDIMTRV	PEPLIST	0.01184	3.427	0.034336	7.406	34484.7				1	HLA-E*01:03	TLNDIMTRV	TLNDIMTRV	0	0	0	0	0	TLNDIMTRV	PEPLIST	0.01184	3.427	0.034336	7.406	34484.7
	1	HLA-E*01:01	TLPPESTQV	TLPPESTQV	0	0	0	0	0	TLPPESTQV	PEPLIST	0.17967	0.099	0.112904	0.36	14738	<=	SB		1	HLA-E*01:03	TLPPESTQV	TLPPESTQV	0	0	0	0	0	TLPPESTQV	PEPLIST	0.17967	0.099	0.112904	0.36	14738	<=	SB
	1	HLA-E*01:01	TLQEFLERI	TLQEFLERI	0	0	0	0	0	TLQEFLERI	PEPLIST	0.025175	1.694	0.062135	2.077	25527	<=	WB		1	HLA-E*01:03	TLQEFLERI	TLQEFLERI	0	0	0	0	0	TLQEFLERI	PEPLIST	0.025175	1.694	0.062135	2.077	25527	<=	WB
	1	HLA-E*01:01	TLSDIMVSL	TLSDIMVSL	0	0	0	0	0	TLSDIMVSL	PEPLIST	0.105881	0.264	0.089781	0.771	18927.4	<=	SB		1	HLA-E*01:03	TLSDIMVSL	TLSDIMVSL	0	0	0	0	0	TLSDIMVSL	PEPLIST	0.105881	0.264	0.089781	0.771	18927.4	<=	SB
	1	HLA-E*01:01	TLTEEGVIKV	TLEEGVIKV	0	2	1	0	0	TLTEEGVIKV	PEPLIST	0.000674	17.627	0.015811	23.259	42138.1				1	HLA-E*01:03	TLTEEGVIKV	TLEEGVIKV	0	2	1	0	0	TLTEEGVIKV	PEPLIST	0.000674	17.627	0.015811	23.259	42138.1
	1	HLA-E*01:01	TLVDEVFRI	TLVDEVFRI	0	0	0	0	0	TLVDEVFRI	PEPLIST	0.01607	2.654	0.04908	3.601	29399.8				1	HLA-E*01:03	TLVDEVFRI	TLVDEVFRI	0	0	0	0	0	TLVDEVFRI	PEPLIST	0.01607	2.654	0.04908	3.601	29399.8
	1	HLA-E*01:01	TLVDFPLHL	TLVDFPLHL	0	0	0	0	0	TLVDFPLHL	PEPLIST	0.199993	0.075	0.114747	0.34	14447	<=	SB		1	HLA-E*01:03	TLVDFPLHL	TLVDFPLHL	0	0	0	0	0	TLVDFPLHL	PEPLIST	0.199993	0.075	0.114747	0.34	14447	<=	SB
	1	HLA-E*01:01	TLVDNISTMAL	TLVDNISTL	0	8	2	0	0	TLVDNISTMAL	PEPLIST	0.004562	6.735	0.030155	9.339	36080.5				1	HLA-E*01:03	TLVDNISTMAL	TLVDNISTL	0	8	2	0	0	TLVDNISTMAL	PEPLIST	0.004562	6.735	0.030155	9.339	36080.5
	1	HLA-E*01:01	TLVQSTLTLQL	TQSTLTLQL	0	1	2	0	0	TLVQSTLTLQL	PEPLIST	0.006644	5.27	0.032934	7.98	35011.8				1	HLA-E*01:03	TLVQSTLTLQL	TQSTLTLQL	0	1	2	0	0	TLVQSTLTLQL	PEPLIST	0.006644	5.27	0.032934	7.98	35011.8
	1	HLA-E*01:01	TLVYHVVGV	TLVYHVVGV	0	0	0	0	0	TLVYHVVGV	PEPLIST	0.007908	4.686	0.035487	6.968	34057.9				1	HLA-E*01:03	TLVYHVVGV	TLVYHVVGV	0	0	0	0	0	TLVYHVVGV	PEPLIST	0.007908	4.686	0.035487	6.968	34057.9
	1	HLA-E*01:01	TLYEAVREV	TLYEAVREV	0	0	0	0	0	TLYEAVREV	PEPLIST	0.060274	0.629	0.075115	1.26	22182.3	<=	WB		1	HLA-E*01:03	TLYEAVREV	TLYEAVREV	0	0	0	0	0	TLYEAVREV	PEPLIST	0.060274	0.629	0.075115	1.26	22182.3	<=	WB
	1	HLA-E*01:01	TMAKESSIIGV	TMAKSIIGV	0	4	2	0	0	TMAKESSIIGV	PEPLIST	0.000391	21.604	0.020415	17.064	40090.4				1	HLA-E*01:03	TMAKESSIIGV	TMAKSIIGV	0	4	2	0	0	TMAKESSIIGV	PEPLIST	0.000391	21.604	0.020415	17.064	40090.4
	1	HLA-E*01:01	TMIDFPQMV	TMIDFPQMV	0	0	0	0	0	TMIDFPQMV	PEPLIST	0.075692	0.472	0.09066	0.745	18748.3	<=	SB		1	HLA-E*01:03	TMIDFPQMV	TMIDFPQMV	0	0	0	0	0	TMIDFPQMV	PEPLIST	0.075692	0.472	0.09066	0.745	18748.3	<=	SB
	1	HLA-E*01:01	TQPAEKDTV	TQPAEKDTV	0	0	0	0	0	TQPAEKDTV	PEPLIST	0.022867	1.888	0.048622	3.676	29545.9	<=	WB		1	HLA-E*01:03	TQPAEKDTV	TQPAEKDTV	0	0	0	0	0	TQPAEKDTV	PEPLIST	0.022867	1.888	0.048622	3.676	29545.9	<=	WB
	1	HLA-E*01:01	TSDMPGTTL	TSDMPGTTL	0	0	0	0	0	TSDMPGTTL	PEPLIST	0.17816	0.101	0.125258	0.245	12894	<=	SB		1	HLA-E*01:03	TSDMPGTTL	TSDMPGTTL	0	0	0	0	0	TSDMPGTTL	PEPLIST	0.17816	0.101	0.125258	0.245	12894	<=	SB
	1	HLA-E*01:01	TVMDSKIVQV	TMDSKIVQV	0	1	1	0	0	TVMDSKIVQV	PEPLIST	0.014269	2.939	0.042857	4.775	31447.5				1	HLA-E*01:03	TVMDSKIVQV	TMDSKIVQV	0	1	1	0	0	TVMDSKIVQV	PEPLIST	0.014269	2.939	0.042857	4.775	31447.5
	1	HLA-E*01:01	TVMGKIFAV	TVMGKIFAV	0	0	0	0	0	TVMGKIFAV	PEPLIST	0.040941	1.023	0.072935	1.363	22711.8	<=	WB		1	HLA-E*01:03	TVMGKIFAV	TVMGKIFAV	0	0	0	0	0	TVMGKIFAV	PEPLIST	0.040941	1.023	0.072935	1.363	22711.8	<=	WB
	1	HLA-E*01:01	TVSTVGISII	TVSTVGISI	0	8	1	0	0	TVSTVGISII	PEPLIST	0.000225	26	0.021755	15.603	39513.4				1	HLA-E*01:03	TVSTVGISII	TVSTVGISI	0	8	1	0	0	TVSTVGISII	PEPLIST	0.000225	26	0.021755	15.603	39513.4
	1	HLA-E*01:01	VADPETRTV	VADPETRTV	0	0	0	0	0	VADPETRTV	PEPLIST	0.08159	0.416	0.064491	1.902	24884.5	<=	SB		1	HLA-E*01:03	VADPETRTV	VADPETRTV	0	0	0	0	0	VADPETRTV	PEPLIST	0.08159	0.416	0.064491	1.902	24884.5	<=	SB
	1	HLA-E*01:01	VAEENTRVL	VAEENTRVL	0	0	0	0	0	VAEENTRVL	PEPLIST	0.095921	0.305	0.088042	0.818	19286.9	<=	SB		1	HLA-E*01:03	VAEENTRVL	VAEENTRVL	0	0	0	0	0	VAEENTRVL	PEPLIST	0.095921	0.305	0.088042	0.818	19286.9	<=	SB
	1	HLA-E*01:01	VAIDAGHESFL	VAIDAGHEL	0	8	2	0	0	VAIDAGHESFL	PEPLIST	0.007752	4.752	0.037715	6.191	33246.7				1	HLA-E*01:03	VAIDAGHESFL	VAIDAGHEL	0	8	2	0	0	VAIDAGHESFL	PEPLIST	0.007752	4.752	0.037715	6.191	33246.7
	1	HLA-E*01:01	VASEKESVM	VASEKESVM	0	0	0	0	0	VASEKESVM	PEPLIST	0.024328	1.765	0.052318	3.119	28387.7	<=	WB		1	HLA-E*01:03	VASEKESVM	VASEKESVM	0	0	0	0	0	VASEKESVM	PEPLIST	0.024328	1.765	0.052318	3.119	28387.7	<=	WB
	1	HLA-E*01:01	VEDAAALKA	VEDAAALKA	0	0	0	0	0	VEDAAALKA	PEPLIST	0.000684	17.529	0.012301	30.378	43769.1				1	HLA-E*01:03	VEDAAALKA	VEDAAALKA	0	0	0	0	0	VEDAAALKA	PEPLIST	0.000684	17.529	0.012301	30.378	43769.1
	1	HLA-E*01:01	VGDPGQRTL	VGDPGQRTL	0	0	0	0	0	VGDPGQRTL	PEPLIST	0.232396	0.058	0.101316	0.52	16706.7	<=	SB		1	HLA-E*01:03	VGDPGQRTL	VGDPGQRTL	0	0	0	0	0	VGDPGQRTL	PEPLIST	0.232396	0.058	0.101316	0.52	16706.7	<=	SB
	1	HLA-E*01:01	VGDPSVHLL	VGDPSVHLL	0	0	0	0	0	VGDPSVHLL	PEPLIST	0.447632	0.012	0.214877	0.036	4889.56	<=	SB		1	HLA-E*01:03	VGDPSVHLL	VGDPSVHLL	0	0	0	0	0	VGDPSVHLL	PEPLIST	0.447632	0.012	0.214877	0.036	4889.56	<=	SB
	1	HLA-E*01:01	VGSAVGHVM	VGSAVGHVM	0	0	0	0	0	VGSAVGHVM	PEPLIST	0.036008	1.192	0.087259	0.838	19451	<=	WB		1	HLA-E*01:03	VGSAVGHVM	VGSAVGHVM	0	0	0	0	0	VGSAVGHVM	PEPLIST	0.036008	1.192	0.087259	0.838	19451	<=	WB
	1	HLA-E*01:01	VIAEILRGV	VIAEILRGV	0	0	0	0	0	VIAEILRGV	PEPLIST	0.00684	5.169	0.043088	4.724	31369				1	HLA-E*01:03	VIAEILRGV	VIAEILRGV	0	0	0	0	0	VIAEILRGV	PEPLIST	0.00684	5.169	0.043088	4.724	31369
	1	HLA-E*01:01	VIANEIEKV	VIANEIEKV	0	0	0	0	0	VIANEIEKV	PEPLIST	0.005243	6.17	0.031708	8.544	35479.3				1	HLA-E*01:03	VIANEIEKV	VIANEIEKV	0	0	0	0	0	VIANEIEKV	PEPLIST	0.005243	6.17	0.031708	8.544	35479.3
	1	HLA-E*01:01	VLDDKLVFV	VLDDKLVFV	0	0	0	0	0	VLDDKLVFV	PEPLIST	0.130155	0.186	0.11693	0.317	14109.8	<=	SB		1	HLA-E*01:03	VLDDKLVFV	VLDDKLVFV	0	0	0	0	0	VLDDKLVFV	PEPLIST	0.130155	0.186	0.11693	0.317	14109.8	<=	SB
	1	HLA-E*01:01	VLESSNPKM	VLESSNPKM	0	0	0	0	0	VLESSNPKM	PEPLIST	0.027996	1.528	0.07095	1.466	23204.8	<=	WB		1	HLA-E*01:03	VLESSNPKM	VLESSNPKM	0	0	0	0	0	VLESSNPKM	PEPLIST	0.027996	1.528	0.07095	1.466	23204.8	<=	WB
	1	HLA-E*01:01	VLFENTDSVHL	VLFENTVHL	0	6	2	0	0	VLFENTDSVHL	PEPLIST	0.030437	1.409	0.053071	3.01	28157.3	<=	WB		1	HLA-E*01:03	VLFENTDSVHL	VLFENTVHL	0	6	2	0	0	VLFENTDSVHL	PEPLIST	0.030437	1.409	0.053071	3.01	28157.3	<=	WB
	1	HLA-E*01:01	VLFSSPPVILL	VLSPPVILL	0	2	2	0	0	VLFSSPPVILL	PEPLIST	0.08957	0.352	0.105141	0.461	16029.3	<=	SB		1	HLA-E*01:03	VLFSSPPVILL	VLSPPVILL	0	2	2	0	0	VLFSSPPVILL	PEPLIST	0.08957	0.352	0.105141	0.461	16029.3	<=	SB
	1	HLA-E*01:01	VLGKVNEI	VLG-KVNEI	0	0	0	3	1	VLGKVNEI	PEPLIST	0.003748	7.578	0.030589	9.11	35911.5				1	HLA-E*01:03	VLGKVNEI	VLG-KVNEI	0	0	0	3	1	VLGKVNEI	PEPLIST	0.003748	7.578	0.030589	9.11	35911.5
	1	HLA-E*01:01	VLIDDLTTL	VLIDDLTTL	0	0	0	0	0	VLIDDLTTL	PEPLIST	0.142782	0.16	0.110099	0.391	15192.1	<=	SB		1	HLA-E*01:03	VLIDDLTTL	VLIDDLTTL	0	0	0	0	0	VLIDDLTTL	PEPLIST	0.142782	0.16	0.110099	0.391	15192.1	<=	SB
	1	HLA-E*01:01	VLIDYQRNV	VLIDYQRNV	0	0	0	0	0	VLIDYQRNV	PEPLIST	0.043652	0.945	0.077367	1.165	21648.3	<=	WB		1	HLA-E*01:03	VLIDYQRNV	VLIDYQRNV	0	0	0	0	0	VLIDYQRNV	PEPLIST	0.043652	0.945	0.077367	1.165	21648.3	<=	WB
	1	HLA-E*01:01	VLIGEFLEKV	VLIGEFLKV	0	7	1	0	0	VLIGEFLEKV	PEPLIST	0.000696	17.412	0.026966	11.266	37347.2				1	HLA-E*01:03	VLIGEFLEKV	VLIGEFLKV	0	7	1	0	0	VLIGEFLEKV	PEPLIST	0.000696	17.412	0.026966	11.266	37347.2
	1	HLA-E*01:01	VLIPKLPQL	VLIPKLPQL	0	0	0	0	0	VLIPKLPQL	PEPLIST	0.577395	0.008	0.247227	0.023	3445.54	<=	SB		1	HLA-E*01:03	VLIPKLPQL	VLIPKLPQL	0	0	0	0	0	VLIPKLPQL	PEPLIST	0.577395	0.008	0.247227	0.023	3445.54	<=	SB
	1	HLA-E*01:01	VLLAAGPSAA	VLAAGPSAA	0	1	1	0	0	VLLAAGPSAA	PEPLIST	5e-05	41	0.012942	28.858	43466.6				1	HLA-E*01:03	VLLAAGPSAA	VLAAGPSAA	0	1	1	0	0	VLLAAGPSAA	PEPLIST	5e-05	41	0.012942	28.858	43466.6
	1	HLA-E*01:01	VLLPKVVNT	VLLPKVVNT	0	0	0	0	0	VLLPKVVNT	PEPLIST	0.007048	5.062	0.027293	11.035	37215.2				1	HLA-E*01:03	VLLPKVVNT	VLLPKVVNT	0	0	0	0	0	VLLPKVVNT	PEPLIST	0.007048	5.062	0.027293	11.035	37215.2
	1	HLA-E*01:01	VLLQVVPSSA	VLLQVPSSA	0	4	1	0	0	VLLQVVPSSA	PEPLIST	0.00019	27.478	0.009846	37.399	44947.3				1	HLA-E*01:03	VLLQVVPSSA	VLLQVPSSA	0	4	1	0	0	VLLQVVPSSA	PEPLIST	0.00019	27.478	0.009846	37.399	44947.3
	1	HLA-E*01:01	VLMKDVQEI	VLMKDVQEI	0	0	0	0	0	VLMKDVQEI	PEPLIST	0.058071	0.66	0.090534	0.749	18773.9	<=	WB		1	HLA-E*01:03	VLMKDVQEI	VLMKDVQEI	0	0	0	0	0	VLMKDVQEI	PEPLIST	0.058071	0.66	0.090534	0.749	18773.9	<=	WB
	1	HLA-E*01:01	VLMTEDIKL	VLMTEDIKL	0	0	0	0	0	VLMTEDIKL	PEPLIST	0.071753	0.509	0.089719	0.772	18940.1	<=	WB		1	HLA-E*01:03	VLMTEDIKL	VLMTEDIKL	0	0	0	0	0	VLMTEDIKL	PEPLIST	0.071753	0.509	0.089719	0.772	18940.1	<=	WB
	1	HLA-E*01:01	VLSDIIQNL	VLSDIIQNL	0	0	0	0	0	VLSDIIQNL	PEPLIST	0.226264	0.06	0.12933	0.217	12338.2	<=	SB		1	HLA-E*01:03	VLSDIIQNL	VLSDIIQNL	0	0	0	0	0	VLSDIIQNL	PEPLIST	0.226264	0.06	0.12933	0.217	12338.2	<=	SB
	1	HLA-E*01:01	VLVNDFFLV	VLVNDFFLV	0	0	0	0	0	VLVNDFFLV	PEPLIST	0.003506	7.864	0.049598	3.516	29235.5				1	HLA-E*01:03	VLVNDFFLV	VLVNDFFLV	0	0	0	0	0	VLVNDFFLV	PEPLIST	0.003506	7.864	0.049598	3.516	29235.5
	1	HLA-E*01:01	VLWDRTFSL	VLWDRTFSL	0	0	0	0	0	VLWDRTFSL	PEPLIST	0.280996	0.035	0.194413	0.053	6101.39	<=	SB		1	HLA-E*01:03	VLWDRTFSL	VLWDRTFSL	0	0	0	0	0	VLWDRTFSL	PEPLIST	0.280996	0.035	0.194413	0.053	6101.39	<=	SB
	1	HLA-E*01:01	VMDPKQMNV	VMDPKQMNV	0	0	0	0	0	VMDPKQMNV	PEPLIST	0.363635	0.018	0.216377	0.035	4810.84	<=	SB		1	HLA-E*01:03	VMDPKQMNV	VMDPKQMNV	0	0	0	0	0	VMDPKQMNV	PEPLIST	0.363635	0.018	0.216377	0.035	4810.84	<=	SB
	1	HLA-E*01:01	VMDSKIVQV	VMDSKIVQV	0	0	0	0	0	VMDSKIVQV	PEPLIST	0.299241	0.029	0.160157	0.108	8838.88	<=	SB		1	HLA-E*01:03	VMDSKIVQV	VMDSKIVQV	0	0	0	0	0	VMDSKIVQV	PEPLIST	0.299241	0.029	0.160157	0.108	8838.88	<=	SB
	1	HLA-E*01:01	VMFKEPVEV	VMFKEPVEV	0	0	0	0	0	VMFKEPVEV	PEPLIST	0.16725	0.117	0.134104	0.191	11717.1	<=	SB		1	HLA-E*01:03	VMFKEPVEV	VMFKEPVEV	0	0	0	0	0	VMFKEPVEV	PEPLIST	0.16725	0.117	0.134104	0.191	11717.1	<=	SB
	1	HLA-E*01:01	VMKALFDL	VMK-ALFDL	0	0	0	3	1	VMKALFDL	PEPLIST	0.002769	9.008	0.044034	4.516	31049.6				1	HLA-E*01:03	VMKALFDL	VMK-ALFDL	0	0	0	3	1	VMKALFDL	PEPLIST	0.002769	9.008	0.044034	4.516	31049.6
	1	HLA-E*01:01	VMLEYVERA	VMLEYVERA	0	0	0	0	0	VMLEYVERA	PEPLIST	0.004719	6.6	0.03323	7.857	34899.8				1	HLA-E*01:03	VMLEYVERA	VMLEYVERA	0	0	0	0	0	VMLEYVERA	PEPLIST	0.004719	6.6	0.03323	7.857	34899.8
	1	HLA-E*01:01	VMQETIRNL	VMQETIRNL	0	0	0	0	0	VMQETIRNL	PEPLIST	0.28993	0.032	0.187045	0.057	6607.71	<=	SB		1	HLA-E*01:03	VMQETIRNL	VMQETIRNL	0	0	0	0	0	VMQETIRNL	PEPLIST	0.28993	0.032	0.187045	0.057	6607.71	<=	SB
	1	HLA-E*01:01	VMQGVSRAEM	VMQGVSAEM	0	6	1	0	0	VMQGVSRAEM	PEPLIST	0.004679	6.635	0.056442	2.616	27148.8				1	HLA-E*01:03	VMQGVSRAEM	VMQGVSAEM	0	6	1	0	0	VMQGVSRAEM	PEPLIST	0.004679	6.635	0.056442	2.616	27148.8
	1	HLA-E*01:01	VNLGGSKSISIS	VNLSKSISI	0	3	2	0	0	VNLGGSKSISI	PEPLIST	4e-06	75	0.005594	59.693	47063.5				1	HLA-E*01:03	VNLGGSKSISIS	VNLSKSISI	0	3	2	0	0	VNLGGSKSISI	PEPLIST	4e-06	75	0.005594	59.693	47063.5
	1	HLA-E*01:01	VQGLAAAA	VQ-GLAAAA	0	0	0	2	1	VQGLAAAA	PEPLIST	0.000149	29.688	0.010571	35.065	44596.1				1	HLA-E*01:03	VQGLAAAA	VQ-GLAAAA	0	0	0	2	1	VQGLAAAA	PEPLIST	0.000149	29.688	0.010571	35.065	44596.1
	1	HLA-E*01:01	VQIEEVRQV	VQIEEVRQV	0	0	0	0	0	VQIEEVRQV	PEPLIST	0.107528	0.257	0.061486	2.136	25706.9	<=	SB		1	HLA-E*01:03	VQIEEVRQV	VQIEEVRQV	0	0	0	0	0	VQIEEVRQV	PEPLIST	0.107528	0.257	0.061486	2.136	25706.9	<=	SB
	1	HLA-E*01:01	VRIASLEVE	VRIASLEVE	0	0	0	0	0	VRIASLEVE	PEPLIST	4.5e-05	42	0.005707	58.865	47005.9				1	HLA-E*01:03	VRIASLEVE	VRIASLEVE	0	0	0	0	0	VRIASLEVE	PEPLIST	4.5e-05	42	0.005707	58.865	47005.9
	1	HLA-E*01:01	VSDDGTLHM	VSDDGTLHM	0	0	0	0	0	VSDDGTLHM	PEPLIST	0.100723	0.284	0.079436	1.086	21169.1	<=	SB		1	HLA-E*01:03	VSDDGTLHM	VSDDGTLHM	0	0	0	0	0	VSDDGTLHM	PEPLIST	0.100723	0.284	0.079436	1.086	21169.1	<=	SB
	1	HLA-E*01:01	VSQVGKEL	VSQV-GKEL	0	0	0	4	1	VSQVGKEL	PEPLIST	0.005512	5.96	0.027287	11.039	37217.7				1	HLA-E*01:03	VSQVGKEL	VSQV-GKEL	0	0	0	4	1	VSQVGKEL	PEPLIST	0.005512	5.96	0.027287	11.039	37217.7
	1	HLA-E*01:01	VTVPPGPSL	VTVPPGPSL	0	0	0	0	0	VTVPPGPSL	PEPLIST	0.323814	0.023	0.175086	0.077	7520.49	<=	SB		1	HLA-E*01:03	VTVPPGPSL	VTVPPGPSL	0	0	0	0	0	VTVPPGPSL	PEPLIST	0.323814	0.023	0.175086	0.077	7520.49	<=	SB
	1	HLA-E*01:01	WLIEDGKVVTV	WEDGKVVTV	0	1	2	0	0	WLIEDGKVVTV	PEPLIST	0.002311	9.942	0.020255	17.249	40159.9				1	HLA-E*01:03	WLIEDGKVVTV	WEDGKVVTV	0	1	2	0	0	WLIEDGKVVTV	PEPLIST	0.002311	9.942	0.020255	17.249	40159.9
	1	HLA-E*01:01	YAEMGTRTF	YAEMGTRTF	0	0	0	0	0	YAEMGTRTF	PEPLIST	0.027568	1.551	0.051328	3.263	28693.3	<=	WB		1	HLA-E*01:03	YAEMGTRTF	YAEMGTRTF	0	0	0	0	0	YAEMGTRTF	PEPLIST	0.027568	1.551	0.051328	3.263	28693.3	<=	WB
	1	HLA-E*01:01	YAYDGKDYI	YAYDGKDYI	0	0	0	0	0	YAYDGKDYI	PEPLIST	0.039435	1.068	0.082142	0.991	20558.3	<=	WB		1	HLA-E*01:03	YAYDGKDYI	YAYDGKDYI	0	0	0	0	0	YAYDGKDYI	PEPLIST	0.039435	1.068	0.082142	0.991	20558.3	<=	WB
	1	HLA-E*01:01	YAYDGKDYIA	YAYDGKYIA	0	6	1	0	0	YAYDGKDYIA	PEPLIST	0.000232	25.759	0.015753	23.36	42164.5				1	HLA-E*01:03	YAYDGKDYIA	YAYDGKYIA	0	6	1	0	0	YAYDGKDYIA	PEPLIST	0.000232	25.759	0.015753	23.36	42164.5
	1	HLA-E*01:01	YIKDGITRV	YIKDGITRV	0	0	0	0	0	YIKDGITRV	PEPLIST	0.022827	1.892	0.032073	8.373	35339.4	<=	WB		1	HLA-E*01:03	YIKDGITRV	YIKDGITRV	0	0	0	0	0	YIKDGITRV	PEPLIST	0.022827	1.892	0.032073	8.373	35339.4	<=	WB
	1	HLA-E*01:01	YLADIFTKL	YLADIFTKL	0	0	0	0	0	YLADIFTKL	PEPLIST	0.184603	0.092	0.108471	0.411	15462.1	<=	SB		1	HLA-E*01:03	YLADIFTKL	YLADIFTKL	0	0	0	0	0	YLADIFTKL	PEPLIST	0.184603	0.092	0.108471	0.411	15462.1	<=	SB
	1	HLA-E*01:01	YLANGQTKV	YLANGQTKV	0	0	0	0	0	YLANGQTKV	PEPLIST	0.012869	3.212	0.041508	5.088	31909.9				1	HLA-E*01:03	YLANGQTKV	YLANGQTKV	0	0	0	0	0	YLANGQTKV	PEPLIST	0.012869	3.212	0.041508	5.088	31909.9
	1	HLA-E*01:01	YLDEYIARM	YLDEYIARM	0	0	0	0	0	YLDEYIARM	PEPLIST	0.125429	0.197	0.121183	0.278	13475.2	<=	SB		1	HLA-E*01:03	YLDEYIARM	YLDEYIARM	0	0	0	0	0	YLDEYIARM	PEPLIST	0.125429	0.197	0.121183	0.278	13475.2	<=	SB
	1	HLA-E*01:01	YLDPAQQNL	YLDPAQQNL	0	0	0	0	0	YLDPAQQNL	PEPLIST	0.375296	0.017	0.16829	0.089	8094.32	<=	SB		1	HLA-E*01:03	YLDPAQQNL	YLDPAQQNL	0	0	0	0	0	YLDPAQQNL	PEPLIST	0.375296	0.017	0.16829	0.089	8094.32	<=	SB
	1	HLA-E*01:01	YLDPAQRGV	YLDPAQRGV	0	0	0	0	0	YLDPAQRGV	PEPLIST	0.050617	0.789	0.070598	1.485	23293.4	<=	WB		1	HLA-E*01:03	YLDPAQRGV	YLDPAQRGV	0	0	0	0	0	YLDPAQRGV	PEPLIST	0.050617	0.789	0.070598	1.485	23293.4	<=	WB
	1	HLA-E*01:01	YLDPNQRDL	YLDPNQRDL	0	0	0	0	0	YLDPNQRDL	PEPLIST	0.167067	0.118	0.114811	0.34	14437	<=	SB		1	HLA-E*01:03	YLDPNQRDL	YLDPNQRDL	0	0	0	0	0	YLDPNQRDL	PEPLIST	0.167067	0.118	0.114811	0.34	14437	<=	SB
	1	HLA-E*01:01	YLGQVAIL	YL-GQVAIL	0	0	0	2	1	YLGQVAIL	PEPLIST	0.004508	6.781	0.029455	9.731	36354.8				1	HLA-E*01:03	YLGQVAIL	YL-GQVAIL	0	0	0	2	1	YLGQVAIL	PEPLIST	0.004508	6.781	0.029455	9.731	36354.8
	1	HLA-E*01:01	YLLPAIVHI	YLLPAIVHI	0	0	0	0	0	YLLPAIVHI	PEPLIST	0.116268	0.227	0.084509	0.911	20038.5	<=	SB		1	HLA-E*01:03	YLLPAIVHI	YLLPAIVHI	0	0	0	0	0	YLLPAIVHI	PEPLIST	0.116268	0.227	0.084509	0.911	20038.5	<=	SB
	1	HLA-E*01:01	YLVSEIFKA	YLVSEIFKA	0	0	0	0	0	YLVSEIFKA	PEPLIST	0.000482	20	0.012859	29.043	43505.7				1	HLA-E*01:03	YLVSEIFKA	YLVSEIFKA	0	0	0	0	0	YLVSEIFKA	PEPLIST	0.000482	20	0.012859	29.043	43505.7
	1	HLA-E*01:01	YLYPDITRL	YLYPDITRL	0	0	0	0	0	YLYPDITRL	PEPLIST	0.281264	0.035	0.132051	0.199	11980.3	<=	SB		1	HLA-E*01:03	YLYPDITRL	YLYPDITRL	0	0	0	0	0	YLYPDITRL	PEPLIST	0.281264	0.035	0.132051	0.199	11980.3	<=	SB
	1	HLA-E*01:01	YMAELIERL	YMAELIERL	0	0	0	0	0	YMAELIERL	PEPLIST	0.195575	0.079	0.140281	0.168	10959.6	<=	SB		1	HLA-E*01:03	YMAELIERL	YMAELIERL	0	0	0	0	0	YMAELIERL	PEPLIST	0.195575	0.079	0.140281	0.168	10959.6	<=	SB
	1	HLA-E*01:01	YMDQWVPVI	YMDQWVPVI	0	0	0	0	0	YMDQWVPVI	PEPLIST	0.119	0.218	0.153614	0.123	9487.3	<=	SB		1	HLA-E*01:03	YMDQWVPVI	YMDQWVPVI	0	0	0	0	0	YMDQWVPVI	PEPLIST	0.119	0.218	0.153614	0.123	9487.3	<=	SB
	1	HLA-E*01:01	YMIAHITGL	YMIAHITGL	0	0	0	0	0	YMIAHITGL	PEPLIST	0.143198	0.159	0.147575	0.141	10127.9	<=	SB		1	HLA-E*01:03	YMIAHITGL	YMIAHITGL	0	0	0	0	0	YMIAHITGL	PEPLIST	0.143198	0.159	0.147575	0.141	10127.9	<=	SB
	1	HLA-E*01:01	YQIPRTFTL	YQIPRTFTL	0	0	0	0	0	YQIPRTFTL	PEPLIST	0.617353	0.007	0.278688	0.014	2451.45	<=	SB		1	HLA-E*01:03	YQIPRTFTL	YQIPRTFTL	0	0	0	0	0	YQIPRTFTL	PEPLIST	0.617353	0.007	0.278688	0.014	2451.45	<=	SB
	1	HLA-E*01:01	YSDDIPHAL	YSDDIPHAL	0	0	0	0	0	YSDDIPHAL	PEPLIST	0.392112	0.016	0.135459	0.186	11546.5	<=	SB		1	HLA-E*01:03	YSDDIPHAL	YSDDIPHAL	0	0	0	0	0	YSDDIPHAL	PEPLIST	0.392112	0.016	0.135459	0.186	11546.5	<=	SB
	1	HLA-E*01:01	YSLDHISSL	YSLDHISSL	0	0	0	0	0	YSLDHISSL	PEPLIST	0.237893	0.056	0.143994	0.153	10528	<=	SB		1	HLA-E*01:03	YSLDHISSL	YSLDHISSL	0	0	0	0	0	YSLDHISSL	PEPLIST	0.237893	0.056	0.143994	0.153	10528	<=	SB
	1	HLA-E*01:01	YSVSAQSSM	YSVSAQSSM	0	0	0	0	0	YSVSAQSSM	PEPLIST	0.014872	2.843	0.057105	2.539	26954.8				1	HLA-E*01:03	YSVSAQSSM	YSVSAQSSM	0	0	0	0	0	YSVSAQSSM	PEPLIST	0.014872	2.843	0.057105	2.539	26954.8
	1	HLA-E*01:01	VMAPRTLV	VMAPRT-LV	0	0	0	6	1	VMAPRTLV	PEPLIST	0.030286	1.416	0.088476	0.807	19196.6	<=	WB		1	HLA-E*01:03	VMAPRTLV	VMAPRT-LV	0	0	0	6	1	VMAPRTLV	PEPLIST	0.030286	1.416	0.088476	0.807	19196.6	<=	WB
	1	HLA-E*01:01	MAPRTLVL	MAP-RTLVL	0	0	0	3	1	MAPRTLVL	PEPLIST	0.077411	0.455	0.118218	0.303	13914.5	<=	SB		1	HLA-E*01:03	MAPRTLVL	MAP-RTLVL	0	0	0	3	1	MAPRTLVL	PEPLIST	0.077411	0.455	0.118218	0.303	13914.5	<=	SB
	1	HLA-E*01:01	MAVMAPRTLVL	MMAPRTLVL	0	1	2	0	0	MAVMAPRTLVL	PEPLIST	0.04638	0.876	0.146342	0.145	10263.9	<=	WB		1	HLA-E*01:03	MAVMAPRTLVL	MMAPRTLVL	0	1	2	0	0	MAVMAPRTLVL	PEPLIST	0.04638	0.876	0.146342	0.145	10263.9	<=	WB
	1	HLA-E*01:01	VMAPRTLVLLL	VMAPRTLLL	0	6	2	0	0	VMAPRTLVLLL	PEPLIST	0.1285	0.19	0.218018	0.035	4726.18	<=	SB		1	HLA-E*01:03	VMAPRTLVLLL	VMAPRTLLL	0	6	2	0	0	VMAPRTLVLLL	PEPLIST	0.1285	0.19	0.218018	0.035	4726.18	<=	SB
	1	HLA-E*01:01	RVTAPRTLLL	RVAPRTLLL	0	2	1	0	0	RVTAPRTLLL	PEPLIST	0.120775	0.212	0.158914	0.111	8958.56	<=	SB		1	HLA-E*01:03	RVTAPRTLLL	RVAPRTLLL	0	2	1	0	0	RVTAPRTLLL	PEPLIST	0.120775	0.212	0.158914	0.111	8958.56	<=	SB
	1	HLA-E*01:01	VMAPRTLI	VMAPRT-LI	0	0	0	6	1	VMAPRTLI	PEPLIST	0.05423	0.718	0.125216	0.246	12899.8	<=	WB		1	HLA-E*01:03	VMAPRTLI	VMAPRT-LI	0	0	0	6	1	VMAPRTLI	PEPLIST	0.05423	0.718	0.125216	0.246	12899.8	<=	WB
	1	HLA-E*01:01	RVMAPRTLIL	RMAPRTLIL	0	1	1	0	0	RVMAPRTLIL	PEPLIST	0.152144	0.142	0.223119	0.032	4472.4	<=	SB		1	HLA-E*01:03	RVMAPRTLIL	RMAPRTLIL	0	1	1	0	0	RVMAPRTLIL	PEPLIST	0.152144	0.142	0.223119	0.032	4472.4	<=	SB
	1	HLA-E*01:01	MAPRTLIL	MAP-RTLIL	0	0	0	3	1	MAPRTLIL	PEPLIST	0.060397	0.627	0.11035	0.388	15150.9	<=	WB		1	HLA-E*01:03	MAPRTLIL	MAP-RTLIL	0	0	0	3	1	MAPRTLIL	PEPLIST	0.060397	0.627	0.11035	0.388	15150.9	<=	WB

## Sheet: Length Distribution
	Seq Length	Non-MS	Non-MS%	MS-based	MS-based%
	7	0	0	3	0.475436
	8	0	0	27	4.27892
	9	87	98.8636	424	67.1949
	10	1	1.13636	91	14.4216
	11	0	0	39	6.18067
	12	0	0	14	2.2187
	13	0	0	6	0.950872
	14	0	0	6	0.950872
	15	0	0	14	2.2187
	16	0	0	7	1.10935
